# Supplementary material for: Fast response methods for aero-elastic floating wind turbine design
Source: Copernicus journal article supplement (doi:10.5194/wes-2025-259), 2025-12-11
Supplement: Supplementary file [file wes-2025-259-AC2-supplement.pdf]

## *Wind Energy Science*

*Authors' response to the review comments*

Paper entitled: Fast response methods for aero-elastic floating wind turbine design

Manuscript number: wes-2025-259

Authors: Bogdan Pamfil, Henrik Bredmose, Taeseong Kim, Wei Yu

---

We would like to express our sincere appreciation to the reviewers for their thoughtful feedback and constructive suggestions and to the editor for expertly managing the review process. We are confident that these comments have helped us to improve the quality of the paper significantly. In response to your feedback, we have made several revisions to the original manuscript. In this document, we aim to address all points raised by the reviewers. All changes made to the paper are indicated in blue font, while the replies to the reviewers' comments are shown in olive font. An additional LaTeX diff document has been attached to our response, highlighting all the changes made to the paper.

### ***Reviewer 1's comments:***

The article builds on earlier work on fast frequency-domain methods for analysis of floating wind turbines dynamics and adds details to the rotor blade aerodynamics by new methods to overcome the challenges with time-variant azimuthal dependencies in the system matrices. In my opinion, this is a significant step forward to supplement time-consuming time-domain methods with fast methods giving enough detail to support optimization studies during early-stage design.

The main scientific significance lies in the application of established and well documented mathematical methods to address fundamental challenges of rotor aerodynamics. So far, the focus of fast frequency-domain engineering methods for floating wind turbines have focused on the floater, and lumped the rotor loads to overall thrust and torque vectors. This article opens the path for comprehensive and fast floating wind turbine models with details of both rotor and floater.

The scientific quality is excellent and convincing. The derivations are detailed enough for other teams to reproduce and further build on the work. The step-by-step comparisons of the different models, converging towards identical results as more details are included, is a good indication of the quality of the work.

I enjoyed reading the article also due to the good presentation quality. Despite the large scope of the article, it is relatively easy to get an overview of the work and the main outcomes.

I think the article will have a large impact on future development of fast engineering models for floating wind turbines and should inspire other teams to include some of these ideas into their modeling efforts.

In my opinion, this article is ready for publication after adding a section on future work, and addressing some minor questions, clarifications and edits.

We sincerely thank Reviewer 1 for the thoughtful review and positive evaluation of our

manuscript. We have revised the text in accordance with their suggestions, which we believe have strengthened the paper.

1. As far as I can tell, hydrodynamic damping is not taken into account in this model. I understand that the focus here is on fast methods and rotor aerodynamics, but I nevertheless suggest some comments on how to incorporate more details of the floater in this modeling framework. Due to the simple structure of the structural damping matrix described in line 140, the pitch damping given by  $C_s(1,1)$  can be scaled separately to take hydrodynamic damping into account. For large-volume floaters, results from Linear- Potential-Theory (LPT) models such as WAMIT provide frequency-domain results for excitation, damping and added mass that can be incorporated as more floater degree-of-freedom (DOFs) are added. Comments like this belongs perhaps under “future work”.

We understand the intention behind this comment regarding the absence of radiation hydrodynamic damping in the present floating wind turbine model and the potential avenues for extending the floater representation. For this reason, we now provide further clarification on how future model extensions could incorporate a frequency-based radiation damping, and added mass. We also clarify how hydrodynamic damping is appropriately scaled within the present framework.

Within the paper’s revised manuscript, Lines 193–212 elaborate on this point in the corrections document (diff tex) and Lines 183-202 in the updated manuscript:

The logarithmic decrement  $\delta_k$  quantifies damping for each degree of freedom (DOF) and is valid for small damping ratios, as assumed here. In floating wind turbines, the platform pitch DOF ( $\xi_5$ ) represents the dominant hydrodynamic damping, modeled via torsional structural damping. For the TetraSpar concept, a 3% damping ratio corresponds to  $\delta_{\xi_5} = 0.20$  and a damping factor of  $\mu_{\xi_5} = 0.30$ , capturing combined structural and hydrodynamic effects through an equivalent stiffness-proportional term (Borg et al., 2024). Although Linear Potential Theory tools (e.g., WAMIT) can model frequency-dependent hydrodynamic effects, these are neglected in favor of a simplified lumped damping approach. For blade DOFs, a much smaller damping ratio (0.5%) is used ( $\delta_{a_l} = 0.03$ , damping factor  $\mu_{a_l} = 0.0024$ ), indicating that blade damping (Bak et al., 2013) is negligible compared to platform hydrodynamic damping.

Within the paper’s Conclusions Section, Lines 951–957 address the same topic related to future work in the corrections document (diff tex) and Lines 922-929 in the updated manuscript:

In the Conclusions Section we add that these potential improvements in floater hydrodynamics include incorporating frequency-dependent radiation damping (drag terms), added-mass effects, and a more detailed representation of hydrostatic stiffness. We emphasize afterwards that these effects can be captured using Linear Potential Theory (LPT) solvers such as WAMIT, which provide frequency-domain descriptions of excitation, damping, and added mass. Then, it is mentioned that the current floating wind

turbine model can readily accommodate additional floater degrees of freedom, particularly for large-volume designs. Future work may also include the effect of reactive forces from mooring lines to further enhance model accuracy.

2. Line 170 (L170): The way I read this section, Cl is evaluated only at 0.7R. I agree that for a well designed rotor, operating at optimum tip-speed ratio, this gives a good idea about the angle-of-attack and Cl for a large part of the outer part of the blade, and thereby the total thrust and torque. Please include (if I did not overlook it) a description on how the overall rotor loads are computed from the aerodynamics evaluation at 0.7R.

We acknowledge that it is worth briefly clarifying why the aerodynamic terms in the lift force expression, including the lift coefficient  $C_L$ , are evaluated at  $0.7R$ . In short, we consider it important to explain how come this radial position is regarded as representative for modeling the rotor loads, as it captures the characteristic inflow and aerodynamic conditions over a substantial portion of the outer blade where most of the thrust and torque are generated.

Lines 254–261 clarify this point in the corrections document (diff tex) and Lines 242–248 in the updated manuscript:

Aerodynamic lift forces are indeed evaluated at the representative blade section located at  $r = 0.7L_b$ . This approach is justified because the mid-to-outer blade region ( $\approx 0.6L_b$ – $0.85L_b$ ) contributes most significantly to both torque and thrust. Conditions at this blade location are considered representative of overall blade behavior, and it was chosen without performing detailed spanwise load calculations. Instead of integrating loads along the full span, rotor loads are approximated by scaling the sectional loads at this point. This simplification captures the dominant aerodynamic dynamics while keeping the model computationally efficient. More details can be found in the corresponding Section 2.3 of the corrected paper.

3. L420: “. . . and  $\mathbf{F}_{B,L}(t_i)$  is assumed to be constant during that time interval.” Is that an ad-hoc decision or are there numerical arguments for this choice? Some staggered methods for time stepping use the forcing at the midpoint of the step to achieve second-order accuracy in time. Has this been considered, is it relevant here?

We think that it is important to add that the staggered approach would in practice increase the accuracy, but since the time step is sufficiently small, this is not the main contributor to the differences between the linear model (LM) and time-domain model (TDM) results.

Lines 534–541 discuss this point in the corrections document (diff tex) and Lines 514–520 in the updated manuscript:

Although midpoint evaluation of the forcing vector,  $\mathbf{F}_{B,L}(t_{i-1} + \frac{dt}{2})$ , is commonly used in staggered time-stepping schemes to achieve second-order accuracy in the time response  $\mathbf{q}(t)$ , its benefit is expected to be limited in the present context. Given the sufficiently small time step  $dt$ , the main discrepancies between the linear and

time-domain models arise from modeling and linearization assumptions rather than time integration errors. Moreover, a midpoint evaluation would require additional model evaluations at intermediate time instants, increasing computational cost since the forcing vector is already computed at each discrete time step  $t_{i-1}$ . For these reasons, a first-order treatment of the forcing vector is adopted for simplicity and computational efficiency.

4. L477: “. . . a turbulence intensity (TI) of 5.77%.” Would higher, but still realistic (say up to 15%) TI challenge modeling assumptions such as the linearizations?

We agree that addressing this detail about TI is important for understanding the accuracy of the fast-response method. It highlights the role of the zeroth-harmonic forcing, and we note that higher TI levels are not expected to challenge the underlying modeling assumptions, such as linearizations.

We examine this matter within Lines 604–609 address in the corrections document (diff tex) and Lines 582-587 in the updated manuscript:

Higher turbulence intensity values, reaching up to 10% or 15%, would still satisfy the underlying modeling assumptions. This is supported by the results for load cases C and E, which include stochastic wind inflow effects and are presented in Sections 6.3 and 6.5, respectively. These results indicate that the influence of turbulence intensity on the system response is adequately captured even by a zeroth-order harmonic approximation, as increasing turbulence intensity further reinforces the dominance of the zeroth-order harmonic contribution in the response.

5. Conclusions: I miss a section on future work. Is it of interest to increase the level of detail, or will the linearizations nevertheless be the main source of error? What would be the next steps? Some examples, are they straight forward?

We concur that adding a section on future work in the Conclusions, incorporating the aforementioned details, enhances the clarity and overall comprehension of the paper. Accordingly, we have added a paragraph in the Conclusions Section that addresses the points that were raised.

Please see Lines 943-962 for details in the corrections document (diff tex) and Lines 915–933 in the updated manuscript:

The floating wind turbine model achieves its main objectives and provides a computationally efficient and flexible framework for analyzing floating wind turbine dynamics, though it relies on simplified aero-hydro representations suitable for preliminary studies. Future improvements could include higher-fidelity blade and tower dynamics, finer blade discretization to better capture spanwise turbulence variations, and incorporation of more detailed floater hydrodynamics using frequency-dependent effects via Linear Potential Theory (LPT) tools. Additional extensions such as rotor control, varying rotational speed, and mooring-line reactions could further enhance model accuracy while remaining consistent with the fast-response methodology. Given that the present results demonstrate the feasibility of the novel fast response methods, a key

direction for future work is the application of these methods within full aero-elastic models for floating wind turbines.

1) Evaluate aerodynamics at several radial stations.

We endorse this observation that evaluating the aerodynamics (such as the lift coefficient) at multiple blade sections would evidently improve the load characterization across the entire rotor. Thus, it is worth stating that this approach would provide a more representative description of the rotor loads.

Refer to Lines 945 and 948–949 for details in the corrections document (diff tex) and Lines 917 and 920-921 in the updated manuscript:

Increasing the number of blade sections used in the rotor load evaluation would enhance the spatial resolution of the aerodynamic load distribution along the blade. This allows for a more accurate representation of spanwise variations in the incoming turbulent wind field, leading to a more refined prediction of the aerodynamic loads.

2) More blade modes

It is also worth mentioning that including additional blade modes is beneficial for the accuracy of the floating wind turbine model, as it allows for a more realistic representation of blade deflection.

We address this concern within Lines 945–948 in the corrections document (diff tex) and Lines 917-920 in the updated manuscript:

To enhance the accuracy of the floating wind turbine model, the blade modal representation could be extended to include edgewise, torsional, and higher-order modes, as well as tower modes, which are currently neglected due to the rigid-tower assumption.

3) Turbulence with variation across the rotor plane

We consider it also important to state that accounting for turbulence variations across the rotor plane for different blade sections would substantially improve the accuracy of the floating wind turbine model.

For additional explanations you may refer to Lines 948–950 in the corrections document (diff tex) and Lines 920-921 in the updated manuscript:

It is evident that increasing the number of blade sections in the rotor load evaluation would improve the resolution of the aerodynamic load distribution by better capturing spanwise variations in the incoming turbulence field, such as those generated by a Mann box. This would allow a more realistic representation of how turbulence intensity and coherence vary along the blade span, leading to improved modeling of the resulting aerodynamic excitation.

4) More detailed hydrodynamics (LPT) of the floater, such as in QuLAF, and linearized floater drag terms.

We find it worthwhile to explain how and why more detailed hydrodynamics of the floater, as well as linearized floater drag terms, can improve the accuracy of the hydrodynamic loading.

Therefore, for a detailed analysis of this matter, please consult Lines 951–955 in the corrections document (diff tex) and Lines 922-926 in the updated manuscript:

Potential improvements in floater hydrodynamics include the addition of frequency-dependent radiation damping (drag terms), added-mass effects, and a more refined representation of hydrostatic stiffness. Such frequency-dependent contributions can be modeled using Linear Potential Theory (LPT) solvers such as WAMIT, which provide frequency-domain estimates of excitation forces, damping, and added mass. The current floating wind turbine formulation can readily incorporate additional floater degrees of freedom (DOFs), which is particularly relevant for large-volume floater designs. As noted earlier in the paper, these considerations are discussed here in the future work subsection of the Conclusions Section but also in Section 2.2: Floater pitch moment excitation. In addition, we emphasize here that accounting for reactive mooring-line forces acting on the floater is expected to further improve model fidelity.

## 6. Appendix A.

A1:  $C_l(\alpha)$ ?

We see how this notation may not have been clear, and this issue has now been resolved by adding an explanation.

That being said, we explain this matter in Lines 984-986 in the corrections document (diff tex) and Lines 954–956 in the revised manuscript:

In summary,  $\phi_l$  is the inflow angle and  $C_{L,l}(\alpha)$  is the lift coefficient as a function of the angle of attack. These aerodynamic properties are evaluated for the airfoil at  $r = d$ .

We clarify the formulation of the integrated normal force  $F_{l,\text{aero}}$  acting on the  $l$ -th blade, which is expressed as  $F_{l,\text{aero}} = L_l \cos \phi_l = \frac{1}{2} \rho c C_{L,l}(\alpha) V_{\text{rel},l}^2 \cos \phi_l L_b$ . We indicate now more clearly at what blade section the inflow angle is evaluated and state that  $C_{L,l}(\alpha)$  is the lift coefficient as a function of the airfoil angle of attack.

It is shown in appendix A how the fully nonlinear force (A1)(which can be used directly in a time-domain model) is linearized and split into steady, forcing terms, damping terms and neglected higher order terms. But it is not totally clear to me what is used in the time-domain model. I suggest stating this explicitly here, even if it is mentioned earlier.

We comprehend that it may not be entirely clear how the wind speed components shown in Fig. A1 are computed differently in the time-domain model (TDM) and the linear model (LM). Therefore, we now remind the reader that, for the TDM, the aerodynamic parameters are computed nonlinearly, whereas the LM relies instead on gradients or partial derivatives of these quantities.

We have reported this revision in Lines 996–1001 and 1010-1019 in the corrections document (diff tex) and Lines 965-970 and 979-987 in the updated manuscript:

In Eq. (A1), for linearization purposes,  $F_l = L_l \cos \phi_l$  represents the aerodynamic load contribution governing the floating wind turbine dynamics. For the development of the LM, the dynamic lift coefficient  $C_{L,l}(\alpha)$ , the squared relative wind speed  $V_{\text{rel},l}^2 = V_{\hat{n},l}^2 + V_{\hat{t},l}^2$ , and the inflow angle term  $\cos \phi_l$  are linearized about the operating point. In contrast, the TDM retains these quantities in their fully nonlinear, time-varying form, thereby preserving nonlinear effects in the computation of  $V_{\text{rel},l}^2$  and the overall aerodynamic forcing. Unlike the LM, the TDM is assembled without the linearization with respect to the time derived structural DOFs vector  $\dot{\mathbf{x}}$ , the dynamic stall separation-function DOFs  $f_{s,l}$ , or the inflow velocity fluctuation  $\Delta V_{0,l}$ .

L790 “. . . assuming additionally the same inflow angle  $\phi_l$  for the entire blade..” The inflow angle usually vary significantly over the blade span, therefore structural twist optimization is important. The angle-of-attack varies to a lesser degree for a well-designed blade operating at optimum tip-speed ratio. Please clarify. This is possibly connected to the comment on using one radial position to evaluate the forces for the complete rotor.

We concur that further clarification would be beneficial to explain why the angle of attack exhibits only a small variation for a well-designed blade operating at its optimal tip-speed ratio. This point relates to the evaluation of aerodynamic loads at a reference radial position to represent the full rotor loads, and we have also provided a justification for this choice earlier in the revised manuscript.

We have addressed this in Lines 988–994 in the corrections document (diff tex) and Lines 957-963 in the updated manuscript:

The aerodynamic properties are evaluated at the representative airfoil section  $r = d = 0.7L_b$ , corresponding to 70% of the blade length. Although the inflow angle varies significantly along the blade span, it is evaluated at that particular radial reference position  $r = d$  and used to represent the aerodynamic forcing over the entire blade. This introduces an approximation in the rotor load estimation, since both the inflow angle and the angle of attack are assumed uniform along the span. It assumes uniform inflow conditions and angle of attack along the span, which can affect rotor load accuracy. Moreover, we have also now provided an earlier explanation in the manuscript justifying the evaluation of the forces over the complete rotor. However, this modeling choice is justified by the objective of developing a reduced-order floating wind turbine model with fewer DOFs and by the dominant contribution of aerodynamic loads in the mid-to-outer blade region which is the selected blade region.

## 7. Minor edits for consideration:

1) L15: It is stated that the rotor loads are pre-computed. I think it would be clarifying to already here mention that aerodynamic damping due to the relative motion between structure and air is taken care of in the damping matrix. Distinguish between pre-computed aerodynamic excitation and aerodynamic damping computed during the simulation.

To avoid any ambiguity on this matter, we must add indeed that aerodynamic damping arises from the relative air motion between the airflow and the floating wind turbine blades. On the other hand, we should have also specified that aerodynamic excitations are in fact pre-computed and accounted for within the system's forcing.

This issue is addressed in Lines 38–45 in the corrections document (diff tex) and Lines 38-44 in the updated manuscript:

We now mention in the revised manuscript that aerodynamic damping originates in the floating wind turbine from the relative motion between the structure and the airflow and contributes directly to the system damping matrix. We also note that aerodynamic excitations induced by inflow velocity fluctuations, which form part of the system forcing, are pre-computed and applied separately. We specify that aerodynamic rotor loads are typically pre-computed assuming a fixed nacelle and parameterized aerodynamic damping. Within this decomposition, rotor loads arise from turbulent inflow variations, whereas aerodynamic damping originates from the relative motion between the structure and the airflow. In full aeroelastic models, these effects are inherently captured, allowing the extraction of linearized forcing and damping through linearization. However, due to the azimuthal dependence of blade positions, the resulting system matrix becomes time-varying, preventing a straightforward transformation to the frequency domain and solution via FFT.

2) L18: I assume the damping is an outcome of the simulation, but this can also be read as the damping is pre-computed.

We are thankful for this comment and intended to specify that the hydrodynamic damping is pre-computed, as it arises from radiation effects.

This matter is now rectified in Lines 19–20 in the corrections document (diff tex) and Lines 19-20 in the updated manuscript:

We now state that “an example of a frequency-domain solver that leverages pre-computed rotor loads and pre-computed radiation hydrodynamic damping is the QuLAF (Quick Load Analysis of Floating Wind Turbines) model”. It is thus more clear what exactly is pre-computed for the QuLAF model.

3) L66: The term “validated” has usually been used for comparison of model and experimental results or full-scale data. But lately I have seen it used also for comparison of models. Since this work is focused on mathematical methods, “validated” may be OK, but nevertheless consider if “verified” is more appropriate.

We acknowledge that “model validation” is not the appropriate term in the context of

this paper, and we have therefore replaced it with “model verification,” as suggested. Thank you for this notification. The paper has been updated accordingly by taking into account your advice to change the model’s validation to its verification instead. This issue has been corrected notably in Lines 72 and 82 in the correction document (diff tex) and Lines 70 and 79 in the updated manuscript.

4) L84/85. Example of clarification: “In this paper, we expand the floating wind turbine model with wind loads for the blade elements of mass  $m(r)$ , wave loads applied to the floater base, and gravity loads for the blade elements and hub and nacelle of cumulative mass  $M$ .”

We also agree with your rephrasing of this sentence, as it provides a clearer description of the floating wind turbine model parameters.

Hence, we rectify this issue in Lines 122–124 in the corrections document (diff tex) and Lines 118–120 in the updated manuscript:

The sentence has been modified in the following way: “In this paper, we extend the floating wind turbine model to include wind loads acting on blade elements of mass  $m(r)$ , wave loads applied at the floater base, and gravitational loads exerted on the blade elements as well as on the hub and nacelle of cumulative mass  $M$ ”.

5) L94: “...that describes the rotational stiffness (component of the water plane stiffness matrix)”

We agree that this modification sheds light on the hydrostatic stiffness component of the stiffness matrix. Therefore, we are in favor of your added revision.

This modification can be seen in Lines 131–133 in the corrections document (diff tex) and Lines 127–129 in the updated manuscript:

The sentence has been modified as such: “The floater pitching moment coefficient  $K_{\xi_5}$  describes the component of the water plane stiffness matrix due to hydrostatic effects.”

L109: The term “rotating coordinate system” is often used for coordinate systems rotating with the rotor. Would “pitching coordinate system” be better?

We support this change in wording to explicitly refer to the pitching coordinate system.

This revision is addressed everywhere including in Line 152 in the corrections document (diff tex) and Line 147 in the updated manuscript.

In other words, we agree with this better choice of terminology for the moving coordinate system, as it follows the pitching motion of the floater and, consequently, of the floating wind turbine.

6) L133: Although  $a_1$  has been defined earlier, it would be good to also here to state that  $a_1$ ,  $a_2$  and  $a_3$  are the blade deflection amplitudes for blade 1, 2 and 3.

This remark is useful to remind the reader about the degrees of freedom, and this has been revised accordingly.

We resolve this matter in Lines 183–184 in the corrections document (diff tex) and Lines 174-175 in the updated manuscript:

We point out now that “In this EOM, the vector of structural DOFs is defined as  $\mathbf{x} = [\xi_5, a_1, a_2, a_3]^T$ , where  $\xi_5$  denotes the floater pitch angle and  $a_1$ ,  $a_2$ , and  $a_3$  represent the blade deflection amplitudes of blades 1, 2, and 3, respectively”.

7) L136: “The structural mass and damping matrices, as defined in Eqs. (11) and (13) of (Pamfil et al., 2025). . .”

We also think that it is necessary to reference the previous publication where the equations are also detailed.

Therefore, we attend to this issue in Lines 185–190 in the corrections document (diff tex) and Lines 176-180 in the updated manuscript:

The two Equations (now Eqs. (5) and (6)) have been added. The sentence has been updated accordingly while also including the reference to the previous stability analysis paper.

8) L157: “The hydrodynamic force is (pre-?) calculated with no spar motion consideration. Hydrodynamic damping is therefore not considered here, but can to some degree be taken into account by scaling the component (1,1) in the structural damping matrix  $\mathbf{C}_S$ .”

We agree with this statement, and this point has been updated accordingly.

Explanations are provided in Lines 232–236 in the corrections document (diff tex) and Lines 222-226 in the updated manuscript:

That text has been edited in the following manner: “The hydrodynamic force,  $F_{\text{hydro}}$ , is pre-calculated with no spar motion consideration. In this case, there is only a wave velocity and acceleration,  $u_0 = u_{\text{wave}}$  and  $\dot{u}_0 = \dot{u}_{\text{wave}}$ , that are perceived by the spar-buoy. Due to the assumption of no spar motion, hydrodynamic damping is not explicitly modeled through the Morison force formulation. Instead, its effect is implicitly accounted for through scaling of the pitch–pitch component (1,1), namely the hydrodynamic damping term  $\mu_{\xi_5} K_{\xi_5}$ , in the damping matrix  $\mathbf{C}_S$ , as discussed earlier.”

9) L223-227: The EOM of the TDM is combined with the original dynamic stall first-order ODE, and the LM’s EOM is combined with the fully linearized dynamic stall model, right?

We understand that there may be some ambiguity on this point, and it has been clarified in the revised manuscript. Indeed, as you mentioned, the TDM equations of motion are coupled with the first-order dynamic stall ODE, whereas the LM equations of motion are instead coupled with the linearized dynamic stall model.

This issue is addressed in Lines 321-323 in the corrections document (diff tex) and Lines 305-308 in the updated manuscript:

We clarify that by adding the following sentence: “In other words, first we couple the EOM of the TDM with the original dynamic stall first-order ODE, and then we couple separately the LM EOM with the fully linearized dynamic stall model.”

10) L344: Check eq. 21:  $q_n(t)$ ,  $q_0(t)$ ?

We believe that  $q_n(t)$  and  $q_0(t)$  are correctly described in the equation, which implies that the formulation is valid.

These terms in Equation (now Eq. (27)) are consistent with those in the previous Equation (now Eq. (26)).

11) L363:” As we supported with a more. . . “ This sentence is heavy, consider rewriting

This observation is helpful, and this has been revised accordingly.

The corrections can be seen in Lines 472–475 in the corrections document (diff tex) and Lines 453-455 in the updated manuscript:

We correct this lengthy sentence by splitting it in two. We first explain that “for some load cases, the zeroth order response,  $\tilde{q}_0$ , is insufficient to account for the total response  $q$  when the latter is highly periodic”. Then it is stated that “this observation has also been noted in the results generated using a more simplified floating wind turbine model; see Fig. 19 of the prior investigation (Pamfil et al., 2024)”.

12) L 761: “The numerical methods that we elaborated are based on several assumptions and possess few limitations”. Few limitations or a few limitations?

We believe that the numerical methods have relatively few limitations, and it is therefore worthwhile to clarify the intended meaning of this statement.

This issue is addressed in Line 933 in the corrections document (diff tex) and Line 905 in the updated manuscript. It was meant that there are few, not a few limitations, because the limitations are limited in quantity.

13) Check the nomenclature list for completeness. I did not check systematically but saw that  $N_s$  is missing.

This issue has been fixed.

There are now several added terms in the nomenclature. It has been noticed that they were missing after rereading the paper multiple times.

***Reviewer 2’s comments:***

This work presents various approaches to incorporate aero-elastic effects in low fidelity models of floating wind turbines. Three methods are presented that account for the azimuthal variation of the system dynamics. The work builds on a previous publication and provides a step forward towards improving fast low fidelity models of floating wind turbines.

The methods and results are presented clearly, although, I personally prefer the paper to be more self-contained. So, if possible, I would recommend trying to include the formulae used in this work instead of referring to equation numbers in a previous publication (not derivations, of course, just the final expressions).

Further detailed comments are provided in the attached PDF. In addition, I have one remaining question: could the authors offer guidance on when the use of the proposed models is especially important compared to frequency-domain approaches that neglect aero-elastic effects? Since this distinction forms part of the motivation for the study, elaborating on this point would strengthen the practical relevance of this work.

We would also like to thank Reviewer 2 for their time and for the evaluation of our manuscript. In response to their comments, we have revised the text accordingly and believe these modifications have strengthened the overall quality of the paper.

We admit that several equations referenced in our previous publication were missing, which may have hindered the readability, and these have now been added to improve the comprehension of the manuscript.

Therefore, as suggested, the few formulae related to the EOM matrices and dynamic stall equations, previously referenced in our stability analysis publication, are now explicitly included in the paper to improve substantially clarity.

We also support the claim that it would be interesting to provide more details on when the use of the proposed fast response methods is especially important compared to frequency-domain approaches that neglect aero-elastic effects.

That being said, we elaborate now with regards to the frequency-domain approaches from prior works that neglect aero-elastic effects. Moreover, we clarify this matter in Lines 63–72 and 910–914 in the corrections document (diff tex) and Lines 61–69 and 882–886 in the updated manuscript.

In the Introduction Section, we specify that the developed fast-response methods are particularly relevant for linearized models in which the Coleman transformation does not yield time-invariant system matrices and where accurate rotor load resolution is required. The transformation removes only the 1P periodicity associated with rotor rotation and does not eliminate higher-order harmonic contributions (Pamfil, 2025). This limitation appears, for example, in two-bladed turbines, where a constant mass matrix is not obtained, and in three-bladed turbines operating under strong shear, where significant higher-harmonic content remains in the system. We also clarify that consequently, residual time periodicity persists even in the transformed system, and the proposed fast-response methods enable

efficient evaluation of rotor loads under such conditions. For time-response analysis, a Coleman-transformed non-rotating frame is therefore not advantageous.

Afterwards, in the Conclusions Section we clarify again that conventional frequency-domain approaches are limited in accuracy, as they cannot directly capture nonlinear effects or the strong periodic rotor-load variations induced by blade rotation and higher-order harmonics. Then we add once more that the present model introduces a more detailed formulation by explicitly accounting for blade-specific rotor loads in both the frequency and Laplace domains, rather than reducing them to hub-level thrust and torque. Finally it is remarked that compared to previous frequency-domain studies that typically use state-space representations without resolving azimuthal loading effects, the proposed formulation includes these contributions explicitly. This is essential not only for accurately capturing aero-elastic interactions in floating wind turbines, but also for the informed design of the floater, rotor, and control system.

1. Seems a bit redundant. May be "linearized models" is enough?

We agree with this observation and acknowledge that slight revision here is warranted to reduce redundancy and, more importantly, to improve clarity.

This matter is dealt with in Lines 15-17 in the corrections document (diff tex) and Line 15-16 in the updated manuscript:

The sentence is now corrected as such: "During the concept development and optimization phase of floating wind turbine design, methods based on linearized models are useful to quickly calculate aerodynamic and hydrodynamic responses from pre-computed rotor loads."

2. Can you elaborate a little on the effect of these assumptions on the applicability of the presented methods to realistic conditions? And, if possible, comment on how they can be relaxed (possibly in a future work?). I think this is relevant given that you state that one of the suggested applications for the presented methods is controller design as stated in the Conclusions section.

We share this view and support the idea that it would be pertinent to present the main modeling assumptions of this study within the Introduction section.

Hence, we discuss this matter further in details in Lines 84–95 in the corrections document (diff tex) and Lines 81-92 in the updated manuscript:

Some modeling assumptions relate to hydrodynamic loading on the floater, dynamic stall, and the level of blade discretization and modal representation used in the rotor load calculations. The simplified four-DOF model is chosen to enable efficient validation while retaining the dominant coupled aero-hydro-elastic effects. These assumptions introduce limitations compared to a full-scale floating wind turbine representation. In particular, neglecting tower flexibility removes low-frequency structural modes that may interact with platform motion, while assuming constant rotor speed and omitting pitch control disregards important control-induced coupling and load

mitigation effects. While tower flexibility can readily be incorporated into the floating wind turbine model without difficulty by following the same approach as in the QuLAF model, the inclusion of varying rotor speed and control constitutes a natural extension of both the stability method of Pamfil et al. (2025) and the present fast-response methodology. However, the retained dynamics capture the key nonlinearities required to demonstrate the proposed fast-response methods. We emphasize that the model is therefore intended as a proof of concept rather than a fully predictive tool. Future work will extend the framework to include variable rotor speed, pitch control, and higher-fidelity structural and aero-hydro-servo dynamics to enable realistic controller design applications. Building on the demonstrated feasibility of the novel fast response methods, an important direction for future work is to apply them within full aero-elastic models for floating wind turbines.

3. Why didn't you consider surge?

We also believe it is important to explain why floater surge was not included in the floating wind turbine model. Accordingly, the text has been updated to include explanations supporting this modeling choice.

A comprehensive review of this matter is given in Lines 106–115 of the corrections document (diff tex) and Lines 103–112 of the updated manuscript:

Floater surge motion is not included in order to reduce model complexity and to focus on the dominant coupled pitch–blade dynamics relevant to the proposed fast-response methods. The model therefore provides a minimal representation of the coupled floater–blade response. Including surge would introduce additional coupling effects and wake–platform interactions, requiring a dynamic wake model with time-varying induction in both the normal and tangential directions of the rotor plane, which is beyond the scope of the present work. However, among the floater DOFs, pitch remains the most dynamically significant for floating wind turbines, as it typically exhibits higher-frequency dynamics and is more prone to control-induced instabilities under above-rated wind speed conditions (Larsen and Hanson, 2007). Finally, the present formulation is intended as a basis that could be extended in future work to include coupled surge motion and dynamic inflow effects.

4. Just to be precise, maybe state that this is under small angle approximation. Also, shouldn't the right hand side of these two equations be  $y$  and  $x$  (not  $y'$  and  $x'$ )?

Actually, we intended to explain that the floater pitch small-angle approximation is not relevant here, as the expressions remain valid for large angles as well.

This matter is discussed in Lines 154–155 in the corrections document (diff tex) and Lines 149–150 in the updated manuscript:

The two relations between the pitching coordinates  $\hat{x}'$  and  $\hat{y}'$  remain valid irrespective

of the amplitude of the floater pitch angle  $\xi_5$ . See the following expressions for details:

$$\hat{x}' = \cos(\xi_5) \hat{x} + \sin(\xi_5) \hat{y}, \quad \hat{y}' = -\sin(\xi_5) \hat{x} + \cos(\xi_5) \hat{y}.$$

This allows us to deduce the corresponding time derivatives:

$$\dot{\hat{x}}' = \dot{\xi}_5 \hat{y}', \quad \dot{\hat{y}}' = -\dot{\xi}_5 \hat{x}'.$$

5. Again, shouldn't this be z not z'? (which is also consistent with your previous publication)

We agree with this correction, and this has been rectified.

This issue is addressed in Line 158 in the corrections document (diff tex) and Lines 153 in the updated manuscript:

Thank you for pointing this out so that it can be revised.

6. What loads were considered in this simulation (first order, second order, viscous drag ... etc.).

We see the added value of clarifying how the hydrodynamic loads were computed, and this has therefore been amended in the revised version of the manuscript.

For a detailed analysis of this matter, please refer to Lines 220–225 in the corrections document (diff tex) and Lines 210–215 in the updated manuscript:

The simulations consider the implementation of the Morison equation to model hydrodynamic forces acting on a slender body, capturing the dominant wave-frequency loads. The Morison formulation represents first-order effects through an inertia term (including added mass) and a nonlinear viscous drag term proportional to the square of the relative velocity. It does not account for second-order diffraction effects arising from wave–structure interaction and wave scattering. These missing contributions include mean-drift forces (steady low-frequency offsets), slow-drift forces (difference-frequency excitations), and sum-frequency forces (higher-frequency responses). These limitations arise from the fact that Morison's equation relies on local undisturbed wave kinematics and is therefore primarily valid for slender structures where diffraction effects are negligible.

7. Can you please clarify what the symbol  $\text{del}(\cdot)$  in the denominator means?

As you suggested, we explain now what is intended when using that symbol.

This issue is addressed in Lines 300–301 (Eq. (13) now) in the corrections document and Line 287–288 (same Eq. (13) now) in the updated manuscript:

We now indicate that in Eq. (13), the numerator is partially derived with respect to a variable of interest (e.g. a time-derived degree of freedom) appearing in the denominator, as indicated by the  $\cdot$  symbol.

8. Shouldn't  $F$ , be a scalar quantity, not be bold here, for consistency? (also the same in Eq. 15)

We agree with this observation and both equations have been fixed accordingly. This issue is revised in Lines 338–340 in the corrections document (diff tex) and Lines 323-325 in the updated manuscript:

The corrections have been made in both current Eqs. (20) and (21).

9. Doesn't this depend on whether the linearized matrix (and excitation) are being used or not?

As you pointed out, performing a fast-response calculation in the frequency domain or Laplace s-domain depends on the use of the linearized system matrices (and corresponding excitation), since this approach is only applicable to linear systems.

This matter is clarified in Lines 349–352 in the corrections document (diff tex) and Lines 332-336 in the updated manuscript:

We explain now more clearly that to develop a fast-response calculation in the frequency domain or in the Laplace s-domain, the state-space formulation in Eq. (17) must be written for the linear system. That entails that system is described using the LM system matrix  $\mathbf{A}_L$  and the corresponding linearized forcing vector  $\mathbf{F}_{B,L}$ . The system matrix  $\mathbf{A}_L$  is periodic and can be represented as a sum of constant harmonic matrices through a double-sided Fourier series, which allows the system to be reformulated as an LTI representation.

10. It is a little confusing to overload bold letters by using them to indicate vectors and Fourier transforms. I understand that it is implied by the dependence on omega, however, I think it would be clearer if you used a different symbol for a Fourier transform of a variable.

We recognize that our previous notation may have caused a minor confusion, and it has therefore been modified as proposed.

This issue is resolved in Lines 369 in the corrections document (diff tex) and Line 353 in the updated manuscript:

Now we adopt instead the following new notation to denote the Fast Fourier Transform (FFT) of a given variable:  $\mathbf{F}_{B,L}(\omega) = FFT\{\mathbf{F}_{B,L}(t)W(t)\}$ . The same notation is used for the inverse Fast Fourier Transform (iFFT).

11. Can you check the use of the term "hyper-matrix"? Correct me if I am wrong, but my understanding is that it refers to an array with higher than two dimensions, which doesn't seem to apply here (same goes for the term "hyper-vector" in the following page).

We understand the need you raised to justify and clarify why we refer to the matrix  $\hat{\mathbf{A}}$  as a hyper-matrix and to the corresponding vector as a hyper-vector.

This issue is addressed in Lines 413–417 in the corrections document (diff tex) and Lines 395-399 in the updated manuscript:

$\hat{\mathbf{A}}$  is referred to as a hyper-matrix because it represents an infinite-dimensional block matrix that couples multiple harmonic components of the state vector. Each entry is itself a matrix acting on the states, resulting in a higher-order structure that can be interpreted as a tensor (or matrix of matrices) indexed by both harmonic components and states. More generally, a hyper-matrix can be viewed as an extension of a conventional matrix to a multidimensional array.

12. Does this mean that it is better to use the LM if the transient responses are of interest?

We believe this point is worth clarifying, as it helps explain why the LM is particularly advantageous for longer transient-response computations, whereas the efficiency of the Laplace method is comparatively lower for shorter simulations.

This point is discussed in Lines 564–566 in the corrections document (diff tex) and Lines 541-543 in the updated manuscript:

For transient response analyses involving longer simulations, the LM approach may be more efficient than the single-perturbation Laplace transform method. This underlines the importance of systematic benchmarking, since both computational cost and accuracy need to be evaluated when selecting an appropriate method. That is why we benchmark CPU time and accuracy in the following sections.

13. I think this needs to be rephrased. It seems to imply that you are using 11.4 m/s in the simulations.

We think as well that it is important to clarify that 11.4 m/s refers to the rated wind speed rather than the wind speed used in the simulations. We have corrected the sentence to remove this ambiguity.

This issue is rectified in Lines 571–574 in the corrections document (diff tex) and Lines 548-550 in the updated manuscript:

In other words, we clarify now that we select an arbitrary operating point below the rated wind speed, being  $V_r = 11.4 \text{ m s}^{-1}$ , as defined for the DTU 10 MW reference

wind turbine (Bak et al., 2013). Thus, the rated velocity is represented now as  $V_r$  instead of  $V_0$ , since it is not equivalent to the operational wind speed  $V_0$ .

14. Can you elaborate a little here? I am not sure I understand why the fast response models are not capturing these effects.

As raised by the reviewer, we recognize the importance of justifying why the fast-response methods do not capture these higher-order coupling effects.

This aspect is thoroughly discussed in Lines 636–641 in the corrections document (diff tex) and Lines 613-617 in the updated manuscript:

The PSD responses of all methods for load case B show dominant peaks at frequencies associated with both  $\Omega$  and  $\Omega_M$ , including  $\Omega_M + \Omega$ . However, only the TDM additionally captures the higher harmonics at  $2\Omega$  and  $3\Omega$ . This indicates that the TDM system matrix  $\mathbf{A}_T(t)$  includes higher-order coupling effects that become apparent at elevated harmonic frequencies, most notably in the  $f_{s,1}$  channel.

15. How long was the simulation time? And how many realizations were used?

We see the value in providing further explanations on the simulation details you raised, and we have accordingly expanded the explanation.

This issue is addressed notably in Lines 647–650 and 675-677 in the corrections document (diff tex), as well as Lines 623-626 and 650-652 in the updated manuscript:

Load case C, like all stochastic load cases (C–E), is based on a single seed realization (with  $TI = 5.77\%$ ) used for the presentation of the time series, frequency response, and logarithmic exceedance probability plots. However, for the Standard Deviation Relative Error analysis discussed in Section 6.7, additional simulations with different turbulence intensities were performed (Fig. C1). Further, we now report that the simulation duration is identical for all load cases (A–E), with  $T_{\text{sim}} = 3071.2$  s.

We also note that, similarly for load case D, the results presented in Fig. 7 are based on a single realization in which the floater pitch moment is stochastic. Furthermore, again for the Standard Deviation Relative Error analysis discussed in Section 6.7, multiple simulations were performed for load case D using different stochastic seeds for the hydrodynamic moment (Fig. C2).

16. I think it'd be better to expand the time window to show at least one cycle of the lowest frequency.

We admit that expanding the time window would be an improvement in this case.

Therefore, this issue is taken care of in Fig. 5.

17. I think a better phrasing is "the absolute value of the relative difference ...". "absolute relative" sounds a bit strange to me :).

We acknowledge that this phrasing can be revised as suggested.

This matter is resolved in Lines 659–662 in the corrections document (diff tex) and Lines 635–637 in the updated manuscript:

The sentence has been updated correctly as such: “In this paper, for exceedance probability plots, the absolute value of the relative difference is evaluated at positive peaks corresponding to the same exceedance probability with respect to a reference quantity, typically the LM value.”

18. I am curious as to why the zero-order method is only showing large deviations in load cases A and C (the cases with constant wind). Can you comment on this?

As you have pointed out, we also recognize the importance of clarifying this point regarding load cases A and D.

A detailed discussion of this matter is provided in Section 6.6 in Lines 716–723 in the corrections document (diff tex) and Lines 690–697 in the updated manuscript:

The zeroth-order method exhibits large deviations in load cases A and D (i.e. constant wind conditions). Turbulent inflow—particularly at higher turbulence intensity—strengthens the dominance of the zeroth-order response through its contribution to the state-space forcing vector  $\mathbf{F}_{B,L}(t)$ . In contrast, under constant wind conditions, the zeroth-order response is less pronounced since  $\mathbf{F}_{B,L}(t)$  is in that case not affected by inflow velocity fluctuations  $\Delta V_{0,l}$  for blade index  $l$ . As a result, the blade response and dynamic stall DOFs are primarily excited through floater pitch motion, which becomes the main source of aerodynamic forcing. In the present model, this coupling is driven by the mass matrix, which is assumed constant at zeroth order, thereby limiting the representation of periodic effects.

19. I am not sure what you mean by “high periodicity”. Can you please explain this term?

We also believe that an explanation of the meaning of periodicity in this context would be helpful, and the necessary adjustments have been made to expand on this point.

This issue is treated in Lines 713–715 in the corrections document (diff tex) and Lines 687–689 in the updated manuscript:

A highly periodic load is characterized by a frequency spectrum dominated by integer harmonics of  $\Omega$  (P harmonics), leading to pronounced spectral peaks at these harmonic frequencies. Also, the system matrix periodicity refers to its time dependency due to different integer harmonics of  $\Omega$ .

20. Why not include the zero-order as well? It seems to be performing well in some load cases

We agree that the zeroth harmonic performs well in certain load cases; however, the

purpose of this table is to present results at the highest achievable accuracy rather than focusing on the majority of load cases.

We further clarify this point in Lines 732–734 in the corrections document (diff tex) and Lines 706-708 in the updated manuscript:

To reduce the size of Table 2, only the higher-order results are presented, as these correspond to the highest accuracy for each perturbation-based method. Although the zeroth-order results appear to perform well for the stochastic load cases C (Figs. 5 and 6) and E (Figs. 9 and 10), they are not included here.

21. The error in load case E of the zeroth harmonic method seems a bit too large when looking at the time series in Figure 9. Please check these values.

We observe that the error associated with the zeroth-order response approximation appears somewhat larger compared to higher-order results; however, it is not large in absolute terms, as the zeroth-order responses are observed to deviate only slightly from the more accurate higher-order solutions. Further, the results for load case E have been checked and they seem to be correct.

For a detailed review of this matter, please consult Lines 759–763 in the corrections document (diff tex) and Lines 732-736 in the updated manuscript:

For load case E, the difference in SDRE values (Fig. 11) between the zeroth-order and higher-order methods is somewhat larger than expected based on the time series, PSD, and logarithmic exceedance probability results (Figs. 9 and 10). However, one must take into account that the SDRE values from Fig. 11 for the zeroth-order channels actually remain below 6%. We now explain that this discrepancy can be attributed to small deviations of the zeroth-order response in the blade channels  $a_1$  and  $f_{s,1}$ , as observed especially in the time series and PSD plots in Fig. 9.

22. This section is only relevant for time domain simulations not if the methods (the ones based on Fourier transform) are implemented in a frequency-domain model. Is this correct? and if so, I think it's worth mentioning.

We partially agree that this section is relevant for time-domain simulations; however, computational efficiency is enhanced for frequency-domain models. Therefore, it remains important whether the methods are Fourier-based or not, and we have implemented corrections to clarify this point and provide additional details.

A detailed explanation of this matter is provided in Lines 829–833 in the corrections document (diff tex) and Lines 802-806 in the updated manuscript:

We now clarify that Section 7 considers the computational cost of time-domain simulations using either the TDM or LM, as well as alternative formulations in the frequency domain (Fourier-based) and the Laplace domain (s-domain). It is explained

afterwards that the proposed fast-response methods are primarily intended for time-domain simulations, where fatigue assessment via rainflow counting and exceedance probability analysis can be performed. Finally, we put put emphasis on the fact that the frequency-domain formulation is introduced solely as a means to improve numerical efficiency.

# Fast response methods for aero-elastic floating wind turbine design

Bogdan Pamfil<sup>1</sup>, Henrik Bredmose<sup>1</sup>, Taeseong Kim<sup>1</sup>, and Wei Yu<sup>2</sup>

<sup>1</sup>DTU Wind and Energy Systems, Koppels Allé, Building 403, DK-2800 Kgs. Lyngby, Denmark

<sup>2</sup>Delft University of Technology, Wind energy section, Faculty of Aerospace Engineering, Kluyverweg 1, 2629 HS Delft, Netherlands

**Correspondence:** Bogdan Pamfil (bopa@dtu.dk)

**Abstract.** Fast response calculations in the frequency domain are valuable during the initial design of floating wind turbines, where many design variants must be evaluated. A direct frequency-domain treatment of ~~aeroelastic~~aero-elastic rotor loads is typically infeasible due to the azimuthal time dependence of the system matrices. To overcome this limitation, we introduce a perturbation-based formulation inspired by Hill’s method, which reformulates the response equations into separate orders  
5 involving constant system matrices derived via Fourier decomposition. This enables accurate and efficient response computation using the Fast Fourier Transform (FFT). For comparison, a Laplace-based perturbation method is also developed using the Laplace transform instead of the Fourier transform. To evaluate the novel fast response methods, we develop an azimuthally periodic and fully linearized model of a floating wind turbine. The response to various load cases is computed under different inflow and floater motion conditions. The proposed Fourier-based fast response method achieves high accuracy, with peak  
10 and standard deviation errors of 2% and 3.5%, respectively, while reducing computation time to 2.5 s for a 4096 s simulation—significantly faster than linear (45 s) and time-domain (90 s) models. ~~The~~Through detailed comparison, we find that one of our approaches, the so-called single perturbation method, offers an effective trade-off between accuracy and speed, making it suitable for design and optimization studies.

## 1 Introduction

15 During the concept development and optimization phase of floating wind turbine design, ~~linearized-models-based-methods~~methods based on linearized models are useful to quickly calculate aerodynamic and hydrodynamic response from pre-computed rotor loads. ~~Because~~Since a wide range of aerodynamic and hydrodynamic load cases are necessary to be tested, the development of a frequency-domain solver is a solution in providing computationally fast responses.

An example of a frequency-domain solver that leverages pre-computed rotor loads and a pre-computed radiation hydrodynamic  
20 damping is the QuLAF (Quick Load Analysis of Floating wind turbines) model. The QuLAF model was introduced by Pegalajar-Jurado et al. (2018) and its performance was further studied by Madsen et al. (2019). It was designed to solve the Equations of Motion (EOMs) in the frequency domain to increase the simulation speed and to facilitate the consideration of frequency-dependent effects, such as added hydrodynamic mass or radiation damping. Its efficiency relies on the Fast Fourier Transform (FFT) solution of a four Degrees of Freedom (DOFs) model that accounts for the floater surge, heave, and  
25 pitch and the first tower mode’s modal amplitude. It considers the aerodynamic rotor loads to be concentrated as a thrust and

moment located at the rotor hub height position and includes the surge, heave, and pitch forcing at the floater basis. QuLAF's features have been proven to be useful notably for the geometric optimization of a TetraSpar floater (Pollini et al., 2023) for a 15 ~~AW~~-MW wind turbine. Similarly, NREL's Response Amplitudes of Floating Turbines (RAFT) model (Hall et al., 2022) was developed to solve the dynamic response in the frequency domain using the EOMs (Hall et al., 2023), and has also been applied for control, optimization, and mooring analysis purposes (Hall et al., 2022; Zalkind and Bortolotti, 2024; Lozon et al., 2024). Another related fast solver is the Simplified Low-Order Wind turbine (SLOW) model (Schlipf et al., 2013), which was initially developed for nonlinear model predictive control in floating wind energy applications, and has since been extended for control and optimization purposes (Lemmer et al., 2017, 2020a, b, 2021). Recent efforts from NTNU have also focused on applying frequency-domain solvers for floater and mooring designs (Abdelmoteleb and Bachynski-Polić, 2024, 2025).

These fast response solvers are beneficial in the preliminary design phase of floating wind turbines because FFT-based linearized models substantially reduce computational cost compared to a time-domain model (TDM) or linear model (LM). ~~However, current frequency-domain approaches are limited in accuracy—they cannot directly correct for nonlinear effects or capture the strong periodicity of rotor loads associated with blade rotation and higher-order harmonics~~ In terms of hydrodynamic loads, these typically include wave-induced forces, added mass, hydrostatic effects, and radiation damping, which can be accounted for in the system matrices. As mentioned, the aerodynamic rotor loads, however, are usually pre-calculated with a non-moving nacelle and parameterized aerodynamic damping. In this decomposition, the rotor loads are due to the turbulent inflow variation, while the aerodynamic damping arises from the relative motion between the structure and the airflow. Since these effects are naturally embedded in full aero-elastic models, extraction of linearized forcing and damping is possible through linearization. Due to the azimuthal dependence of blade positions, however, the resulting system matrix is not constant in time, and transformation to the frequency domain and solution by FFT are not directly possible.

To address this limitation, the present study introduces novel fast response methods for a ~~blade-resolved~~ LM that are executed with the FFT algorithm as in the QuLAF code. For comparison with Fourier-based methods, we implement a technique that uses the inverse Laplace transform to convert the solution from the  $s$ -domain to the time domain. The novelty of this study lies in the development of fast response methods based on the separation of time varying elements of the system matrices and corrections within a state-space formulation, which can be expressed in either the frequency or Laplace domain.

Building on this foundation, the present work extends frequency- and Laplace-domain methodologies to floating wind energy with a focus on blade aerodynamic loads rather than floater hydrodynamic and mooring loads. In our model, ~~the novelty lies in explicitly accounting~~ we explicitly account for blade-dependent rotor loads in both the frequency- and Laplace-domain, rather than reducing them to thrust and moment at the rotor hub, as done in existing models such as QuLAF, RAFT, and SLOW. While previous studies modeled the EOM in state-space form without considering azimuthal blade load effects, our formulation includes these effects directly. Linearizing motion-coupled aerodynamic forces remains challenging because of the blades' passage through a disturbed inflow, leading to time-variant azimuthal dependencies in the system matrices. To enable the assembly of a constant system transfer function, one needs to get around the azimuthal dependence of the system matrix.

The proposed fast response methods draw inspiration from Hill's method (Hill, 1886), which employs harmonic decomposition to convert a periodic system into a linear time-invariant one (LTI)—a process also related to Floquet's theory (Floquet,

1883). Our previous work (Pamfil et al., 2025) has shown that Hill’s method produces stability analysis results consistent with Floquet’s [theory](#) and Coleman’s (Coleman et al., 1957) ~~transformation~~[transformation](#), while avoiding the latter’s limitations for two-bladed rotors or cases with wind shear and gravity effects. ~~Hill’s method~~[The fast-response methods that we developed are particularly relevant for linearized models in which the Coleman transform does not yield time-invariant system matrices, and where accurate resolution of rotor loads is required. The transformation is designed to eliminate only the first-harmonic \(1P\) periodicity related to the rotational speed and does not remove higher-order harmonic contributions \(Pamfil, 2025\). This occurs, for instance, in two-bladed turbines, for which the transformation does not produce an azimuthally time-invariant \(constant\) mass matrix, as well as in three-bladed turbines operating under strong shear conditions, where significant higher-harmonic content persists in the system. Consequently, our fast-response methods enable efficient evaluation of rotor loads in situations where residual periodicity remains in a Coleman transformed system. For such periodic systems, eigenmode analysis can be conducted by Hill’s method which uses a truncated Fourier series to decompose the system matrix into a harmonic summation of constant terms, and the](#). The reliability and accuracy of this decomposition have been further ~~validated~~[verified](#) also by Hansen (2016) and Skjoldan (2009). Consequently, we exploit this harmonic decomposition to enable fast response calculations based on the FFT algorithm (Cooley and Tukey, 1965) and to develop a Laplace-based method relying on the inverse of the Laplace transform.

The FFT algorithm (Cooley and Tukey, 1965) ensures computational efficiency in the frequency domain while the Laplace transform provides a pathway for response analysis through transfer functions represented in the  $s$ -domain. Although Laplace-domain computations require the inverse transformation to obtain time-domain results—often a computational bottleneck—various numerical inversion algorithms, such as Talbot’s method (Talbot, 1979), Stehfest’s algorithm (Stehfest, 1970), and the de Hoog continued fraction method (de Hoog et al., 1982), offer accurate solutions. In this study, MATLAB’s symbolic inverse Laplace function (`ilaplace`) is used for convenience.

The fast response methods in this paper are ~~validated~~[verified](#) using a simplified four-DOF floating wind turbine model, incorporating floater pitch motion and blade flapwise deflection (first mode only), as well as dynamic stall and gravity effects. The rotor speed is assumed constant, and pitch control and tower deflection are neglected to reduce complexity. [Other modeling assumptions relate to hydrodynamic loading on the floater, dynamic stall and the number of blade sections and modes used in rotor load computations. This simplified four-DOF model was chosen to enable efficient validation while retaining the dominant coupled aero-hydro-elastic effects. These assumptions do introduce certain limitations with respect to the behavior of a full-scale floating wind turbine. In particular, neglecting tower flexibility removes the dynamics associated with tower bending and its coupling to the platform motion, while assuming constant rotor speed and omitting blade pitch control disregards control-induced coupling effects and load mitigation mechanisms. Yet, the tower flexibility can readily be incorporated by following the same approach as in the QuLAF model \(Pegalajar-Jurado et al., 2018\). Moreover, the inclusion of varying rotor speed and control is a natural extension of both the stability method of Pamfil et al. \(Pamfil et al., 2025\) and has been described in Pamfil \(2025\). However, the included dynamics capture the key degrees of freedom relevant to demonstrating the proposed fast response methods. Therefore, despite its simplicity, the model remains suitable for demonstrating the effectiveness of the fast response methods that we developed and for identifying trends that are expected to persist in more complete models.](#)

Multiple load cases are simulated, including steady, sheared, and turbulent inflow, and harmonic or stochastic floater pitch excitation. The accuracy for the fast response calculation variants is analyzed for a given duration against benchmark results of the original LM. Metrics include the exceedance probability results and the Standard Deviation Relative Error (SDRE) with respect to the LM and CPU time. Results demonstrate that fast response methods achieve a good trade-off between speed and accuracy. With limited loss of accuracy, they can potentially accelerate the state-of-the-art TDMs such as HAWC2, OpenFAST, SIMA, and Bladed, making them promising tools for early-stage design and optimization of Floating Offshore Wind Turbines (FOWTs).

## 2 Model description

As illustrated in Fig. 1, the floating wind turbine model considered operates at a constant rotational speed  $\Omega$  and has four structural DOFs, being the flapwise deflection of the three blades, denoted by  $a_l$ , and the floater's pitch angular motion, represented by  $\xi_5$ . Floater surge motion was not included in order to reduce the model's complexity and to focus on the dominant coupled pitch-blade dynamics relevant to the proposed fast response methods. In other words, the model is intended to provide a minimal representation of the coupled floater-blade response. Including the floater surge would introduce additional coupling effects and wake-platform interactions. This would require consideration of a dynamic wake model with time-varying induction factors in the directions normal and tangential to the rotor plane, which is beyond the scope of the current model. The paper aims to develop an analytical model that could combine platform surge motion with dynamic inflow effects in future extensions, while the present work focuses on establishing and validating the core formulation. Nonetheless, among the floater surge and pitch DOFs, pitch is the most dynamically significant for floating wind turbines, as it typically exhibits the highest natural frequency and is the mode in which control-induced instabilities may arise under above-rated wind speed conditions (Larsen and Hanson, 2007). Moreover, there is a hydrodynamic forcing moment  $M_F$  exerted on the floater base which represents wave forcing. The dynamic rotor loads for each  $l^{th}$  blade are applied in the rotor out-of-plane direction (along the  $\hat{y}'$  axis), which coincides with the blade deflection  $u_l(r, t)$ . These loads arise from a concentrated aerodynamic blade force  $F_{l,aero}$  applied at a reference location  $d$  from the hub, as well as from a constant velocity  $V_0$  with the fluctuation  $\Delta V_{0,l}$  generated by a sheared and turbulent inflow. The blade aerodynamic loads and the contributions to wind velocity from the constant velocity  $V_0$ , turbulent fluctuation  $V_{0,l,turb}$ , and sheared inflow  $V_{0,l, shear}$  are illustrated in Fig. 1. More details about the considered floating wind turbine model ~~has been elaborated by the author~~ can be found in the author's previous related work (Pamfil et al., 2025). In this paper, we ~~expand extend~~ the floating wind turbine model with wind-, wave and gravity loads for the to include wind loads acting on blade elements of mass  $m(r)$  ~~and the-~~ , wave loads applied at the floater base, and gravitational loads exerted on the blade elements as well as on the hub and nacelle of cumulative mass  $M$ .

The floating wind turbine model (Pamfil et al., 2025) also includes Øye's dynamic stall model (Øye, 1991), through three additional aerodynamic DOFs. The blade deflection is approximated using a modal approach, where only the blade first flapwise mode ( $1f$ ) contribution is taken into account. The reason why the blade deflection approximation is computed using only the blade first flapwise mode is in order to alleviate the model's number of DOFs and thus simplify it. The structural properties

of the floating wind turbine, such as the blade first flapwise mode's characteristics (natural frequency  $\omega_{1f}$ , mode shape  $\phi_{1f}$ , and modal mass), the blade length  $L_b$  and mass per unit length  $m(r)$ , the rotor hub height  $H$  and the combined mass  $M$  for the hub and nacelle, are all based on the DTU 10 MW-MW reference wind turbine (Bak et al., 2013). The floater pitching moment coefficient  $K_{\xi_5}$ , that describes the rotational stiffness (Pamfil et al., 2025), describes the component of the water plane stiffness matrix due to hydrostatic effects. The value of  $K_{\xi_5}$  was chosen to achieve a floater pitch period of 28.57 s and thus a frequency of  $f_{\xi_5} = 0.035$  Hz (Pamfil et al., 2025).

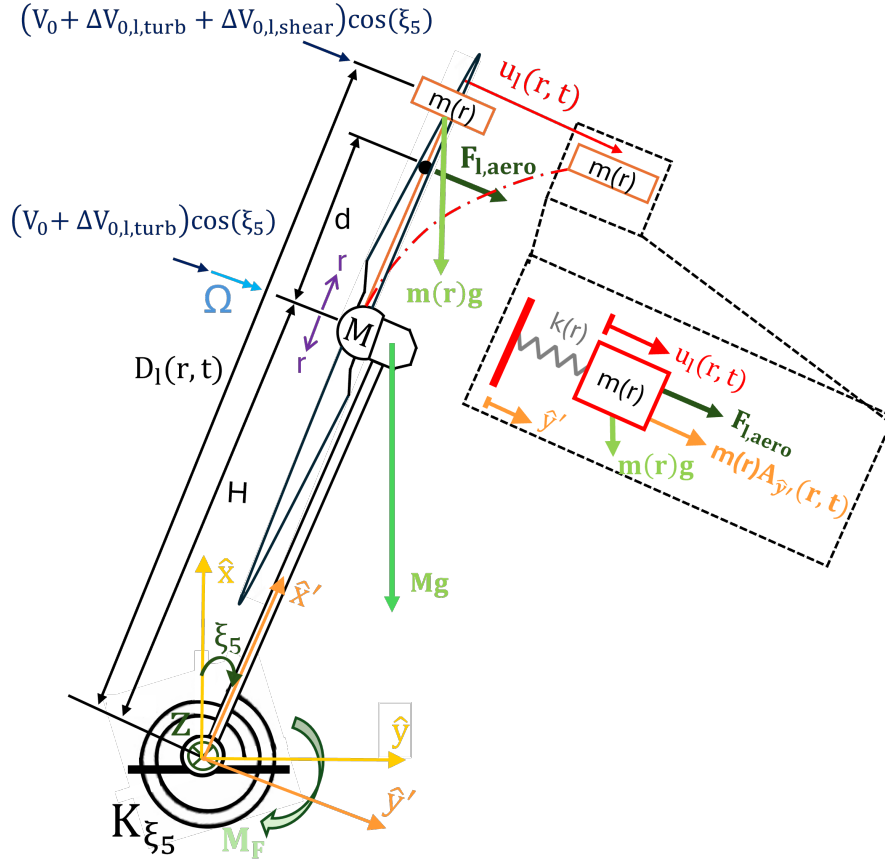

**Figure 1.** Floating wind turbine model where blade properties and parameters vary in the radial direction  $r$  and with blade index  $l$ . This includes the blade deflection  $u_l(r, t)$  and the distance of a blade element mass  $m(r)$  from the floater base being  $D_l(r, t)$ .

135 The distance  $d$  measured from the hub marks a reference radial position  $r = d$  along the blade, at 70% of the blade's length ( $d = 0.7L_b$ ), where the aerodynamic load on each blade,  $F_{l,aero}$ , is calculated.  $F_{l,aero}$  is indicative of the load distribution along the entire blade.

Finally, it should be emphasized that this floating wind turbine model serves solely as a representative case study to illustrate the proposed fast response methods. As previously noted, the model makes simplifying assumptions regarding dynamic stall, the number of blade sections and modes in rotor load calculations, and the hydrodynamic loading on the floater. Despite these

simplifications, it provides a basis for demonstrating the fast response methods, with future work aimed at applying it within a fully detailed modeling framework.

## 2.1 Equations of motion

For completeness, we provide a summary of the derivation of EOMs that we have already elaborated in previous work (Pamfil et al., 2025). To this end, we introduce the time-varying azimuthal angular position  $\Psi_l(t)$  of a blade  $l$ , which is defined as  $\Psi_l(t) = \frac{2\pi}{N_b} (l-1) + \Omega t$  and where  $N_b = 3$  is the rotor's number of blades and  $\Omega$  is its constant rotational speed.

For a non-deformed blade, the time-varying distance  $D_l(r, t)$  of a blade element with mass  $m(r)$  along the  $\hat{x}'$  axis is calculated relative to the floater base position. It is also impacted by the radial position  $r$  from the hub, yielding  $D_l(r, t) = H + r \cos \Psi_l(t)$ . For a deformed blade case, the local blade deflection  $u_l(r, t)$  is computed as  $u_l(r, t) = \phi_{1f}(r) a_l(t)$ , where only the first flapwise (1f) mode shape  $\phi_{1f}(r)$  with amplitude  $a_l(t)$  is taken into consideration.

Subsequently, given a blade element's distance  $D_l(r, t)$  from the floater basis and its deflection  $u_l(r, t)$ , its position  $\hat{D}_l(r, t)$  is tracked as  $\hat{D}_l(r, t) = D_l(r, t) \hat{x}'(t) + u_l(r, t) \hat{y}'(t)$ , in the rotating-pitching coordinate system  $(\hat{x}', \hat{y}')$ . Fig. 1 shows that the unit vectors  $\hat{x}'$  and  $\hat{y}'$  can be expressed in terms of the global fixed coordinates  $\hat{x}$  and  $\hat{y}$  as  $\hat{x}' = \cos(\xi_5) \hat{x} + \sin(\xi_5) \hat{y}$  and  $\hat{y}' = -\sin(\xi_5) \hat{x} + \cos(\xi_5) \hat{y}$ . This allows us to deduce the following time derivatives of  $\dot{\hat{x}}' = \dot{\xi}_5 \hat{y}'$  and  $\dot{\hat{y}}' = -\dot{\xi}_5 \hat{x}'$ . These two relations between the pitching coordinates  $\hat{x}'$  and  $\hat{y}'$  are valid irrespective of the amplitude of the floater pitch angle  $\xi_5$ . As previously demonstrated (Pamfil et al., 2025), these time derivatives are then used to lay out the kinematic equations for velocity  $\hat{V}_l(r, t)$ , acceleration  $\hat{A}_l(r, t) = A_{\hat{x}', l} \hat{x}' + A_{\hat{y}', l} \hat{y}'$  and the rate of change of angular momentum  $p_l(r, t)$  around the axis  $\hat{z}' = \hat{x}' \times \hat{y}'$ . The  $\hat{z}' = \hat{x}' \times \hat{y}'$ . The resulting linearized rate of change of angular momentum,  $p_{l, \text{lin}}(r, t)$ , is detailed in Eq. (7) of our publication related to the current study (Pamfil et al., 2025).  $p_{l, \text{lin}}(r, t)$ , can be described as

$$p_l(r, t) \approx p_{l, \text{lin}}(r, t) = m(r) \left( D_l^2(r, t) \ddot{\xi}_5 + 2D_l(r, t) \dot{D}_l(r, t) \dot{\xi}_5 + D_l(r, t) \ddot{u}_l(r, t) - \ddot{D}_l(r, t) u_l(r, t) \right). \quad (1)$$

Moving forward, the translational and rotational-pitching motion equations can be derived, along with the resulting EOM. To derive the Equation-of-Motion (EOM)EOM, we first establish the rotational-pitching motion equation for moments about the  $\hat{z}$  axis as

$$\begin{aligned} \hat{z} : & MH^2 \ddot{\xi}_5 \delta \xi_5 + K_{\xi_5} \xi_5 \delta \xi_5 + M g H \sin \xi_5 \delta \xi_5 + \\ & \sum_{l=1}^{N_b} \left( \int_0^{L_b} (p_{l, \text{lin}}(r, t) + m(r) g D_l(r, t) \sin \xi_5) dr \delta \xi_5 \right) \\ & = M_F \delta \xi_5 + \underbrace{\left( \sum_{l=1}^{N_b} D_l(d, t) F_{l, \text{aero}}(t) \right)}_{M_{\text{aero}}} \delta \xi_5, \end{aligned} \quad (2)$$

165 through the conservation of angular momentum for a virtual rotation-pitch angle  $\delta\xi_5$ . In Eq. (2), there is an internal angular momentum forcing component that considers the gravitational load contribution of the nacelle and hub having a cumulative mass  $M$ . The other gravitational angular momentum load contribution is accounted for by integrating the distributed mass  $m(r)$  along the blade span with a moment arm  $D_l(r, t)$ . The external forcing arises from the applied floater pitch moment  $M_F$  and the induced aerodynamic moment  ~~$M_{aero}$~~  $M_{aero}$ , which is generated by the aerodynamic loads  ~~$F_{l,aero}$~~  $F_{l,aero}$  acting with  
170 the same moment arm  $D_l(r, t)$ .

In addition, the equation of translational motion along the  $\hat{y}'$  axis for each blade is obtained as

$$\begin{aligned} \hat{y}' : \int_0^{L_b} \left( \underbrace{m(r)A_{\hat{y}',l}(r,t)}_{f_{\hat{y}',l}(r,t)} + m(r)g \sin \xi_5 \right) \delta a_l \phi_{1f}(r) dr + \\ \underbrace{\int_0^{L_b} k(r)a_l(t)\phi_{1f}(r) (\delta a_l \phi_{1f}(r)) dr}_{K_{a_l} a_l \delta a_l} \\ = \underbrace{F_{l,aero}(t)\phi_{1f}(d)}_{GF_{a_l}} \delta a_l, \end{aligned} \quad (3)$$

where the blade displacement virtual work is given by  $\delta u_l(r, t) = \delta a_l(t)\phi_{1f}(r)$ . In Eq. (3), the inertial force  $f_{\hat{y}',l}(r, t) = m(r)A_{\hat{y}',l}(r, t)$  for a mass element  $m(r)$  is influenced by the linearized tangential acceleration  $A_{\hat{y}',l}(r, t)$ , where only linear  
175 terms are retained. Here,  $k(r)$  represents the blade sectional stiffness, defined as  $k(r) = m(r)\omega_{1f}^2$ , which is derived from the first flapwise natural frequency  $\omega_{1f}$ , while  $\phi_{1f}(d)$  represents the value of the first flapwise mode shape at  $r = d$ . The blade internal gravitational load is obtained by integrating the load component perpendicular to the rotor plane along the blade span. The external blade force considered in Eq. (3) for each  $l^{\text{th}}$  blade is denoted as the generalized aerodynamic blade force,  $GF_{a_l}$ .

The forcing terms for both the rotational-pitching and translation motion equations are implemented within the TDM forcing  
180 vector  $F_T$ . The TDM's dynamics is described by the ~~EOM for the structural DOFs vector of~~  $\mathbf{x} = [\xi_5, a_1, a_2, a_3]^T$ , following EOM:

$$\mathbf{M}_S \ddot{\mathbf{x}} + \mathbf{C}_S \dot{\mathbf{x}} + \mathbf{K}_S \mathbf{x} = F_T. \quad (4)$$

In this EOM, the vector of structural DOFs is defined as  $\mathbf{x} = [\xi_5, a_1, a_2, a_3]^T$ , where  $\xi_5$  denotes the floater pitch angle and  $a_1, a_2,$  and  $a_3$  represent the blade deflection amplitudes of blades 1, 2, and 3, respectively. Eq. (4) also includes the structural  
185 (index  $S$ ) mass  $\mathbf{M}_S$ , damping  $\mathbf{C}_S$  and stiffness  $\mathbf{K}_S$  matrices. The structural mass and damping matrices ~~as defined in Eqs. (11) and (13)~~, are taken from the model developed in our earlier work on floating wind turbine stability analysis (Pamfil et al.,

2025) which gives:

$$\mathbf{M}_S = \begin{bmatrix} MH^2 & 0 & 0 & 0 \\ 0 & 0 & 0 & 0 \\ 0 & 0 & 0 & 0 \\ 0 & 0 & 0 & 0 \end{bmatrix} + \int_0^{L_b} m(r) \mathbf{M}_{S,b}(r) dr \quad (5)$$

$$\mathbf{M}_{S,b} = \begin{bmatrix} \sum_{l=1}^3 D_l^2(r,t) & D_1(r,t)\phi_{1f}(r) & D_2(r,t)\phi_{1f}(r) & D_3(r,t)\phi_{1f}(r) \\ D_1(r,t)\phi_{1f}(r) & \phi_{1f}^2(r) & 0 & 0 \\ D_2(r,t)\phi_{1f}(r) & 0 & \phi_{1f}^2(r) & 0 \\ D_3(r,t)\phi_{1f}(r) & 0 & 0 & \phi_{1f}^2(r) \end{bmatrix},$$

and

$$\mathbf{C}_S = \begin{bmatrix} \mu_{\xi_5} K_{\xi_5} & 0 & 0 & 0 \\ 0 & 0 & 0 & 0 \\ 0 & 0 & 0 & 0 \\ 0 & 0 & 0 & 0 \end{bmatrix} + \int_0^{L_b} m(r) \mathbf{C}_{S,b}(r) dr \quad (6)$$

$$\mathbf{C}_{S,b} = \begin{bmatrix} \sum_{l=1}^3 2D_l(r,t)\dot{D}_l(r,t) & 0 & 0 & 0 \\ 2\dot{D}_1(r,t)\phi_{1f}(r) & \mu_{a_1}\omega_{1f}^2\phi_{1f}^2(r) & 0 & 0 \\ 2\dot{D}_2(r,t)\phi_{1f}(r) & 0 & \mu_{a_2}\omega_{1f}^2\phi_{1f}^2(r) & 0 \\ 2\dot{D}_3(r,t)\phi_{1f}(r) & 0 & 0 & \mu_{a_3}\omega_{1f}^2\phi_{1f}^2(r) \end{bmatrix}.$$

However, the stiffness matrix now includes gravitational terms, rendering it as follows:

$$\mathbf{K}_S = \begin{bmatrix} K_{\xi_5} + M g H & 0 & 0 & 0 \\ 0 & 0 & 0 & 0 \\ 0 & 0 & 0 & 0 \\ 0 & 0 & 0 & 0 \end{bmatrix} + \int_0^{L_b} m(r) \mathbf{K}_{S,b}(r) dr \quad (7)$$

$$\mathbf{K}_{S,b} = \begin{bmatrix} \sum_{l=1}^3 g D_l(r,t) & -\ddot{D}_1(r,t)\phi_{1f}(r) & -\ddot{D}_2(r,t)\phi_{1f}(r) & -\ddot{D}_3(r,t)\phi_{1f}(r) \\ g\phi_{1f}(r) & \omega_{1f}^2\phi_{1f}^2(r) & 0 & 0 \\ g\phi_{1f}(r) & 0 & \omega_{1f}^2\phi_{1f}^2(r) & 0 \\ g\phi_{1f}(r) & 0 & 0 & \omega_{1f}^2\phi_{1f}^2(r) \end{bmatrix}.$$

The gravity terms in the structural matrix  $\mathbf{K}_S$  consider the small floater tilt assumption, such that  $\sin \xi_5 \approx \xi_5$ . Inspired from the Rayleigh damping approach, we have chosen the structural contribution of the structural damping matrix  $\mathbf{C}_S$  to be expressed as  $\mathbf{C}_S = \mu \mathbf{K}_S$ , where  $\mu$  is a scaling factor applied to the structural stiffness matrix. In this expression, only the diagonal elements of the structural stiffness matrix  $\mathbf{K}_S$ , that are not affected by gravitational effects, are utilized within  $\mathbf{C}_S$ . As for the

hydrodynamic damping contribution  $\mu_{\xi_5} K_{\xi_5}$  to the structural damping matrix  $C_S$ , it is included in Eq. (6). The approximation for the damping ratio  $\zeta_k$  can be written as

$$\zeta_k = \frac{\delta_k}{\sqrt{4\pi^2 + \delta_k^2}} \approx \frac{\delta_k}{2\pi} \quad \text{and} \quad \mu_k = \frac{2\zeta_k}{\omega_k}, \quad (8)$$

200 where  $\delta_k$  is the logarithmic decrement for a  $k^{\text{th}}$  degree of freedom. It is valid for sufficiently small damping ratios, which is consistent with the present application. In the floating wind turbine context, the torsional structural damping applied to the platform pitch DOF  $\xi_5$  is used to represent the dominant hydrodynamic damping associated with the floater motion. For the TetraSpar concept, a pitch damping ratio of  $\zeta_{\xi_5} = 3\%$  with a corresponding logarithmic decrement of  $\delta_{\xi_5} = 0.20$  is reported by Borg et al. (2024), resulting in a damping factor of  $\mu_{\xi_5} = 0.30$ . This value reflects the combined effect of  
 205 structural and hydrodynamic damping acting on the platform pitch response. Hence, the hydrodynamic damping is lumped into an equivalent stiffness-proportional damping term for the floater pitch angle DOF. Linear Potential Theory (LPT) solvers, such as WAMIT (Wave Analysis MIT), can provide frequency-domain estimates of hydrodynamic excitation forces, radiation damping and added mass, which can be incorporated as matrix contributions to the EOM. In our simplified framework, the frequency dependence of radiation damping is neglected, and a lumped hydrodynamic damping representation is favored  
 210 instead. For the blade DOFs  $a_l$ , the damping ratio is set to a comparatively low value of  $\zeta_{a_l} = 0.5\%$  (Bak et al., 2013), with a corresponding logarithmic decrement of  $\delta_{a_l} = 0.03$  and damping factor of  $\mu_{a_l} = 0.0024$ . This conveys the minor contribution of blade structural damping relative to the hydrodynamic damping of the floater.

## 2.2 Floater pitch moment excitation

Regarding the floater pitch moment of excitation,  $M_F$ , it can be either harmonic or stochastic. The harmonic floater pitch  
 215 moment  $M_F$  has an amplitude  $A_M$  and an excitation frequency  $\Omega_M$ ,  $M_F = A_M \cos(\Omega_M t)$ , to model a regular wave forcing effect that affects the sinusoidal floater motion. The numerical value of  $A_M = 1.212 \cdot 10^7$  Nm is selected to represent a realistic amplitude of the floater moment excitation for a floating wind turbine with the DTU 10 MW-MW size and characteristics. As for the excitation frequency of  $\Omega_M = 0.15 \cdot 2\pi$  rad s<sup>-1</sup>, it is also representative of a typical sea-state.

On the other hand, the stochastic hydrodynamic moment  $M_F$  that is considered in this paper, is extracted from simulations  
 220 carried out for a water depth of  $h = 320$  m for a representative spar-floater-spar-buoy floater. These simulations consider the implementation of linear wave kinematics and the Morison equation to describe the hydrodynamic forces acting on the slender body through an inertia term and a nonlinear viscous drag term proportional to the square of the relative velocity. However, it does not include second-order diffraction forces, mean drift forces, slow-drift forces (difference-frequency excitations), and sum-frequency forces (higher-frequency contributions). Inclusion of these effects is possible but was left out due to  
 225 the demonstration purpose of the model. The spar-buoy floater's main specifications are its submerged underwater draft,  $\hat{x}_{Bot} = -120$  m  $\hat{x}_{Bot} = -120$  m, and its diameter,  $D_{Spar} = 11.2$  m  $D_{Spar} = 11.2$  m, that relates to the cylinder cross-sectional area  $A_{Spar} = \frac{\pi}{4} D_{Spar}^2$ . These dimensions are representative of a 10 MW-MW spar design.

Calculating the stochastic hydrodynamic moment for a spar-buoy floater,  $M_F \equiv \tau_{\text{hydro}}$ , greatly simplifies calculations through the usage of the Morison equation. To do so, we calculate first the hydrodynamic force  $F_{\text{hydro}}$  per unit length, and next integrate up to the still water level at  $\hat{x} = 0$  after multiplication with the moment arm  $\hat{x}$ ,

$$\begin{aligned} \tau_{\text{hydro}} &= \int_{\hat{x}_{\text{Bot}}}^0 \hat{x} F_{\text{hydro}} d\hat{x} \\ &= \int_{\hat{x}_{\text{Bot}}}^0 \hat{x} \rho_{\text{water}} C_m A_{\text{Spar}} \dot{u}_0 d\hat{x} + \int_{\hat{x}_{\text{Bot}}}^0 \frac{1}{2} \hat{x} \rho_{\text{water}} C_{D,\text{water}} D_{\text{Spar}} u_0 |u_0| d\hat{x}. \end{aligned} \quad (9)$$

The hydrodynamic force ~~is calculated~~,  $F_{\text{hydro}}$ , is pre-calculated with no spar motion consideration. In this case, there is only a wave velocity and acceleration,  $u_0 = u_{\text{wave}}$  and  $\dot{u}_0 = \dot{u}_{\text{wave}}$ , that are perceived by the spar-buoy. Due to the assumption of no spar motion, hydrodynamic damping is not explicitly modeled through the Morison force formulation. Instead, its effect is implicitly accounted for through scaling of the pitch-pitch component (1,1), namely the hydrodynamic damping term  $\mu_{\xi_s} K_{\xi_s}$ , in the damping matrix  $C_S$ , as discussed earlier. In Eq. (9),  $\rho_{\text{water}}$  denotes the water density,  $C_{D,\text{water}}$  is the drag coefficient, and the inertia term  $C_m$  is defined as  $C_m = 1 + C_a$ , where  $C_a$  is the added-mass coefficient, set to  $C_a = 1$ , while the remaining contribution is attributed to the Froude-Krylov force. The stochasticity in Eq. (9) arises from  $u_{\text{wave}}$  stems from  $u_{\text{wave}}$ 's spectral decomposition for a number  $N$  of wave frequency  $\omega_{\text{wave},j}$  samples with a stochastic phase shift  $\epsilon_j$  applied.

$$u_{\text{wave}}(\hat{x}, \hat{y}) = \sum_{j=1}^N A_{\text{wave},j} \omega_{\text{wave},j} \frac{\cosh(k_{\text{wave},j}(\hat{x} + h))}{\sinh(k_{\text{wave},j}h)} \cos(\omega_{\text{wave},j}t + \epsilon_{\text{wave},j}). \quad (10)$$

In Eq. (10),  $A_{\text{wave},j}$  is the wave amplitude obtained from the JONSWAP spectrum with a prescribed significant wave height  $H_s = 1.2$  m, a peak period  $T_p = 10$  s and a peak enhancement factor of  $\gamma = 3.3$ . The prescribed  $H_s$  and  $T_p$  values are correlated to the water depth  $h$  and to the inflow velocity  $V_0$  for the operational state of the wind turbine. Additionally,  $k_{\text{wave},j}$  is the wave number solved through the wave dispersion relation, i.e.  $\omega_{\text{wave},j}^2 = gk_{\text{wave},j} \tanh(k_{\text{wave},j}h)$ .

### 2.3 Aerodynamic load

The loading vector,  $F_T$ , that is acting on the structure is not only influenced by the floater pitch hydrodynamic moment,  $M_F$ , but also by the aerodynamic loads. The aerodynamic loads,  $F_{l,aero}$ , acting on the blades are directly influenced by the lift force,  $L_l$ , and evaluated at the reference radial position  $r = d$ ,  $L_l = \frac{1}{2} \rho \{c C_{L,l} V_{rel,l}^2\}_{r=d}$  of  $d = 0.7L_b$ . The lift force  $L_l$  is a function of air density  $\rho$ , the local airfoil relative velocity  $V_{rel,l}$ , the airfoil chord length  $c$ , and the dynamic lift coefficient  $C_{L,l}$ . The dynamic lift coefficient  $C_{L,l}$  is computed through the dependency on the dynamic stall separation function,  $f_{s,l}$ , which has been more thoroughly explained in the associated publication (Pamfil et al., 2025). This is elaborated in Section 3.1 and Appendix B. Further, the aerodynamic terms from the lift force  $L_l$  definition are evaluated at the representative blade section located at  $r = 0.7L_b$ . This choice is motivated by well-established

characteristics of horizontal-axis wind turbine aerodynamics. In the mid-to-outer blade region, typically between  $0.6L_b$  and  $0.85L_b$ , the relative inflow velocity is high and the blade operates close to its design angle of attack at optimal tip-speed ratio. The local aerodynamic state at  $0.7L_b$  can be regarded as representative of the effective operating conditions over a large portion of the load-bearing blade span. The total rotor loads are thus here approximated by scaling the sectional loads evaluated at  $r = 0.7L_b$  to the full rotor. This lift force formulation was adopted to retain a simple and computationally efficient floating wind turbine model, consistent with the objectives of the present study.

## 2.4 Inflow velocity fluctuation

The inflow velocity consists of a constant value  $V_0$  at hub height  $H$  and a fluctuation that is caused by a spatially coherent turbulent inflow  $\Delta V_{0,t,turb}$  and a shear periodic variation  $\Delta V_{0,t,shear}$ , refer to Fig. 1. The presence of turbulence generates a variability in the wind speed that affects the rotor stochastic aerodynamic forces. We consider a deterministic linear shear velocity model for wind (Hansen, 2015) at hub height ( $\hat{x} = H$ ) to determine the shear inflow velocity variation  $\Delta V_{0,t,shear}$  around that point given the shear exponent  $\nu_{shear} = 0.2$ .

On top of the velocity variation  $\Delta V_{0,t,shear}$ , a turbulent spatially coherent variation  $\Delta V_{0,t,turb}$  is taken also into account in the inflow velocity  $V_{0,l} = V_0(\hat{x} = H) + \Delta V_{0,l}$  that is perceived by the  $l^{th}$  blade. This results in

$$\begin{aligned}
 V_{0,l} &= V_0(H) + \left. \frac{\partial \left( V_0(H) \left( \frac{\hat{x}}{H} \right)^{\nu_{shear}} \right)}{\partial \hat{x}} \right|_{\hat{x}=H} \Delta \hat{x}_l(d) + \Delta V_{0,t,turb} \\
 &= V_0(H) + \underbrace{V_0(H) \left( \frac{\nu_{shear} d \cos \Psi_l}{H} \right)}_{\Delta V_{0,t,shear}} + \Delta V_{0,t,turb},
 \end{aligned} \tag{11}$$

where the radial distance from the hub,  $\Delta \hat{x}_l(r) = r \cos \Psi_l$  is taken at  $r = d$ . The inflow velocity component that affects the system dynamics is its projection in the normal direction to the rotor plane,  $V_{0,l} \cos(\xi_5)$ . Due to the small floater pitching angle assumption,  $\xi_5 \ll 1$ , the term  $V_{0,l} \cos(\xi_5)$  is approximated as  $V_{0,l}$ .

The spatially uniform turbulent inflow is taken at the hub height  $H$  of 119 m from a Mann turbulence box (Mann, 1994), with a mean inflow velocity at the hub of  $V_0 = 8 \text{ ms}^{-1}$  and a mean hub turbulence intensity (TI) of 5.77%. The Mann turbulence grid box has a constant spatial step  $d\hat{y}$  in the inflow direction, and the time step increment is given by  $dt = d\hat{y}/V_0$  (Mann, 1994).

To calculate the impact of the inflow velocity fluctuation on the aerodynamic load  $F_{l,aero}$ , the velocity triangle components of the airfoil at the reference radial position ( $r = d$ ) must be investigated. The resulting velocity triangle description is presented in Appendix A.

## 3 Model linearization with forcing

Further, we linearize the model to enable fast response calculations. The linearization methodology of aerodynamic variables, that are velocity dependent, considers a steady term (noted  $st$ ) and a linear variation, as demonstrated here for variable  $Y_l$ ,

i.e.  $Y_{l,lin} = Y_{l,st} + \Delta Y_l$ . Using a first-order Taylor expansion, the linearized variable  $Y_{l,lin}$  is

$$285 \quad Y_{l,lin} = Y_{l,st} + \left. \frac{\partial Y_l}{\partial \dot{a}_l} \right|_{st} \dot{a}_l + \left. \frac{\partial Y_l}{\partial f_{s,l}} \right|_{st} f_{s,l} + \left. \frac{\partial Y_l}{\partial \dot{\xi}_5} \right|_{st} \dot{\xi}_5 + \left. \frac{\partial Y_l}{\partial \Delta V_{0,l}} \right|_{st} \Delta V_{0,l}, \quad (12)$$

where we linearize with respect to the time derivative of the structural DOFs vector,  $\dot{\mathbf{x}}$ , the dynamic stall separation function DOFs,  $f_{s,l}$ , and the inflow velocity fluctuation,  $\Delta V_{0,l}$ . In addition, the partial derivatives concerning the inflow angle  $\phi_l$  play a significant role in the linearization of the system equations and that is detailed in Appendix A.

### 3.1 Dynamic stall

290 The Øye dynamic stall model (Øye, 1991) that is implemented in this paper only serves as a fast response methods demonstration and is not meant to be compared to experimental data. In Øye's model, dynamic stall is captured in the lift coefficient  $C_L$  via the flow separation function  $f_s$ , which represents the location  $x$  of the trailing edge separation point measured from the leading edge, normalized by the chord length, meaning that  $f_s = x/c$  (Øye, 1991). Within this framework,  $C_{L,inv}(\alpha)$  refers to the lift coefficient under inviscid or fully attached flow ( $f_s = 1$ ), while  $C_{L,stall}(\alpha)$  pertains to a fully separated flow ( $f_s = 0$ )

295 with stall occurring at the leading edge. The Øye stall model equations are presented in Appendix B, where we also justify the choice of this stall model for the present work, supported by our previous studies (Pamfil et al., 2025).

### 3.2 Aerodynamic loads linearization

To obtain the LM EOM, the aerodynamic force  $F_{l,aero}$  from Eq. (A1) can be linearized through

$$\begin{aligned} \frac{\partial F_{l,lin}}{\partial \cdot} &= \frac{\partial (L_{l,lin} \cos \phi_{l,lin})}{\partial \cdot} = \frac{1}{2} \rho c \left( \left. \frac{\partial C_{L,l}}{\partial \cdot} \right|_{st} \cos \phi_{st} V_{rel,st}^2 \right. \\ &+ \left. C_{L,st} \left. \frac{\partial \cos \phi_{l,lin}}{\partial \cdot} \right|_{st} V_{rel,st}^2 + C_{L,st} \cos \phi_{st} \left. \frac{\partial (V_{rel,l}^2)}{\partial \cdot} \right|_{st} \right), \end{aligned} \quad (13)$$

300 where the system linearized equations have to be considered. In Eq. (13), the numerator is partially derived with respect to a variable of interest (e.g. a time derived DOF) in the denominator, as denoted by the  $\cdot$  symbol. The linearization methodology serves to obtain the linearized EOM,

$$\mathbf{M}_S \ddot{\mathbf{x}} + (\mathbf{C}_S + \mathbf{C}_A) \dot{\mathbf{x}} + \mathbf{K}_S \mathbf{x} = \mathbf{F}_L, \quad (14)$$

through the formulation of a linearized forcing vector  $\mathbf{F}_L$  and an aerodynamic damping matrix contribution that was formerly developed in Eq. (27) from

305

$$\mathbf{C}_A = - \begin{bmatrix} \left. \frac{\partial M_{aero,lin}}{\partial \dot{\xi}_5} \right|_{st} & \left. \frac{\partial M_{aero,lin}}{\partial \dot{a}_1} \right|_{st} & \left. \frac{\partial M_{aero,lin}}{\partial \dot{a}_2} \right|_{st} & \left. \frac{\partial M_{aero,lin}}{\partial \dot{a}_3} \right|_{st} \\ \left. \frac{\partial G F_{a1,lin}}{\partial \dot{\xi}_5} \right|_{st} & \left. \frac{\partial G F_{a1,lin}}{\partial \dot{a}_1} \right|_{st} & 0 & 0 \\ \left. \frac{\partial G F_{a2,lin}}{\partial \dot{\xi}_5} \right|_{st} & 0 & \left. \frac{\partial G F_{a2,lin}}{\partial \dot{a}_2} \right|_{st} & 0 \\ \left. \frac{\partial G F_{a3,lin}}{\partial \dot{\xi}_5} \right|_{st} & 0 & 0 & \left. \frac{\partial G F_{a3,lin}}{\partial \dot{a}_3} \right|_{st} \end{bmatrix}, \quad (15)$$

as shown in our stability analysis paper (Pamfil et al., 2025). The aerodynamic damping matrix  $\mathbf{C}_A$  in the LM EOM is computed at steady-state (stst) conditions for an operational point. That operational point is characterized by a specific rotational speed,  $\Omega$ , and a constant inflow velocity,  $V_0$ , without an inflow velocity variation,  $\Delta V_{0,l}$ , taken into account. The aerodynamic forcing terms from Eqs. (2) and (3) are linearized with the notation  $GF_{a_1,lin} = F_{l,lin} L_b \phi_{1f}(d)$  and  $M_{aero,lin} = \sum_{l=1}^{N_b} F_{l,lin} L_b (H + d \cos \Psi_l)$  and  $M_{aero,lin} = \sum_{l=1}^{N_b} F_{l,lin} L_b (H + d \cos \Psi_l)$ . The linearized loads  $GF_{a_1,lin}$  and  $M_{aero,lin}$ ,  $GF_{a_2,lin}$  and  $M_{aero,lin}$  can also be derived partially with respect to the separation function  $f_s$  to obtain the Jacobian matrix  $[\partial \mathbf{F}_i / \partial \mathbf{f}_{s,j}]$  from the earlier model used for stability analysis purposes, refer to Eq. (32) (Pamfil et al., 2025) (Pamfil et al., 2025).

$$[\partial \mathbf{F}_i / \partial \mathbf{f}_{s,j}] = \begin{bmatrix} \frac{\partial M_{aero,lin}}{\partial f_{s,1}} & \frac{\partial M_{aero,lin}}{\partial f_{s,2}} & \frac{\partial M_{aero,lin}}{\partial f_{s,3}} \\ \frac{\partial GF_{a_1,lin}}{\partial f_{s,1}} & 0 & 0 \\ 0 & \frac{\partial GF_{a_2,lin}}{\partial f_{s,2}} & 0 \\ 0 & 0 & \frac{\partial GF_{a_3,lin}}{\partial f_{s,3}} \end{bmatrix}. \quad (16)$$

In Eq. (32) (Pamfil et al., 2025)(16), which involves the partial derivative  $\frac{\partial C_{L,i}}{\partial f_{s,j}}$ , the dynamic stall degrees of freedom (DOFs) vector is defined as  $\mathbf{f}_s = [f_{s,1}, f_{s,2}, f_{s,3}]^T$  and the aerodynamic forcing vector is given by  $\mathbf{F} = [M_{aero,lin}, GF_{a_1,lin}, GF_{a_2,lin}, GF_{a_3,lin}]^T$ .

### 3.3 State-space representation with forcing input

To assemble a first-order state-space model (ODE Ordinary Differential Equation (ODE)), we rely first on the EOM of the TDM from Eq. (4), or the LM's EOM from Eq. (14). We combine the EOM, which is a second-order ODE, with either the original dynamic stall first-order ODE or its fully linearized variant (Eq. (B4)). In other words, first we couple the EOM of the TDM with the original dynamic stall first-order ODE, and then we couple separately the LM EOM with the fully linearized dynamic stall model. The resulting state-space model is presented as

$$\dot{\mathbf{q}} = \mathbf{A} \mathbf{q} + \mathbf{F}_B. \quad (17)$$

In this expression, the state vector  $\mathbf{q} = [\mathbf{x}_{4 \times 1}^T, \dot{\mathbf{x}}_{4 \times 1}^T, \mathbf{f}_s^T]^T$  is of length  $N_s = 11$  and contains the structural DOFs vector  $\mathbf{x}$ , its time derivative  $\dot{\mathbf{x}}$  and the dynamic stall variable  $f_{s,l}$  for each blade within vector  $\mathbf{f}_s = [f_{s,1}, f_{s,2}, f_{s,3}]^T$ . The system matrix  $\mathbf{A}$  is respectively developed as follows for the TDM,

$$\mathbf{A}_T = \begin{bmatrix} [\mathbf{0}_{4 \times 4}] & [\mathbf{I}_{4 \times 4}] & [\mathbf{0}_{4 \times 3}] \\ [-\mathbf{M}_S^{-1} \mathbf{K}_S] & [-\mathbf{M}_S^{-1} \mathbf{C}_S] & [\mathbf{M}_S^{-1} [\partial \mathbf{F}_i / \partial \mathbf{f}_{s,j}]] \\ [\mathbf{0}_{3 \times 4}] & [\mathbf{0}_{3 \times 4}] & [\partial \dot{\mathbf{f}}_{s,i} / \partial \mathbf{f}_{s,j}] \end{bmatrix} \quad (18)$$

and for the LM,

$$330 \quad \mathbf{A}_L = \begin{bmatrix} [\mathbf{0}_{4 \times 4}] & [\mathbf{I}_{4 \times 4}] & [\mathbf{0}_{4 \times 3}] \\ [-\mathbf{M}_S^{-1} \mathbf{K}_S] & [-\mathbf{M}_S^{-1} (\mathbf{C}_S + \mathbf{C}_A)] & [\mathbf{M}_S^{-1} [\partial \mathbf{F}_i / \partial \mathbf{f}_{s,j}]] \\ [\mathbf{0}_{3 \times 4}] & [\partial \dot{\mathbf{f}}_{s,i} / \partial \dot{\mathbf{x}}_j] & [\partial \dot{\mathbf{f}}_{s,i} / \partial \mathbf{f}_{s,j}] \end{bmatrix}_{\text{st}}, \quad (19)$$

whose matrix components are evaluated at the steady-state (~~st~~<sub>st</sub>) for the operational conditions. The linearization of the ODE for  $\dot{\mathbf{f}}_{s,l}$  in Eq. (B4) is represented by the two Jacobian matrices,  $[\partial \dot{\mathbf{f}}_{s,i} / \partial \dot{\mathbf{x}}_j]_{3 \times 4}$  and  $[\partial \dot{\mathbf{f}}_{s,i} / \partial \mathbf{f}_{s,j}]_{3 \times 3}$ . For these two Jacobian matrices, the element of row index  $i$  is partially derived with respect to the variable of column  $j$  index. To verify that the LM exhibits a physically consistent behavior, we previously performed decay test simulations with initial perturbations (Pamfil et al., 2025) to compare results against the TDM. The results in Fig. 5 (Pamfil et al., 2025) were expressed as deviations from the steady-state values and the time-domain plots confirmed the consistency between the results produced by the TDM and the LM. To further elaborate the state-space model, the forcing input vector  $\mathbf{F}_B$  for the TDM,

$$335 \quad \mathbf{F}_{B,T} = \begin{bmatrix} [\mathbf{0}_{4 \times 1}] \\ \mathbf{M}_S^{-1} \begin{bmatrix} \sum_{l=1}^3 F_{T,\xi_5} (C_{L,\text{stall},l}) + M_F \\ F_{T,a_1} (C_{L,\text{stall},1}) \\ F_{T,a_2} (C_{L,\text{stall},2}) \\ F_{T,a_3} (C_{L,\text{stall},3}) \\ \left[ \begin{matrix} f_{s,\text{static},1}/\tau \\ f_{s,\text{static},2}/\tau \\ f_{s,\text{static},3}/\tau \end{matrix} \right] \end{bmatrix} \end{bmatrix}, \quad (20)$$

does not consider a full linearization of the dynamic stall ODE unlike the LM as follows

$$340 \quad \mathbf{F}_{B,L} = \begin{bmatrix} [\mathbf{0}_{4 \times 1}] \\ \mathbf{M}_S^{-1} \begin{bmatrix} M_F + \underbrace{\sum_{l=1}^3 (F_{L,\xi_5} (\Delta V_{0,l}) + F_{L,\xi_5} (\Delta V_{0,l}^2))}_{M_{\text{aero,lin}} (\Delta V_{0,l}, \Delta V_{0,l}^2)} \\ GF_{a_1,\text{lin}} (\Delta V_{0,1}, \Delta V_{0,1}^2) = F_{L,a_1} (\Delta V_{0,1}) + F_{L,a_1} (\Delta V_{0,1}^2) \\ GF_{a_2,\text{lin}} (\Delta V_{0,2}, \Delta V_{0,2}^2) = F_{L,a_2} (\Delta V_{0,2}) + F_{L,a_2} (\Delta V_{0,2}^2) \\ GF_{a_3,\text{lin}} (\Delta V_{0,3}, \Delta V_{0,3}^2) = F_{L,a_3} (\Delta V_{0,3}) + F_{L,a_3} (\Delta V_{0,3}^2) \\ \left[ \begin{matrix} \frac{1}{\tau} \left( \frac{\partial f_{s,\text{static},1}}{\partial \alpha_1} \right)_{\text{st}} \frac{\partial \phi_1}{\partial \Delta V_{0,1}} \Big|_{\text{st}} \Delta V_{0,1} \\ \frac{1}{\tau} \left( \frac{\partial f_{s,\text{static},2}}{\partial \alpha_2} \right)_{\text{st}} \frac{\partial \phi_2}{\partial \Delta V_{0,2}} \Big|_{\text{st}} \Delta V_{0,2} \\ \frac{1}{\tau} \left( \frac{\partial f_{s,\text{static},3}}{\partial \alpha_3} \right)_{\text{st}} \frac{\partial \phi_3}{\partial \Delta V_{0,3}} \Big|_{\text{st}} \Delta V_{0,3} \end{matrix} \right] \end{bmatrix} \end{bmatrix}. \quad (21)$$

The forcing vector from the EOM has components for both the TDM (index  $T$ ) and LM (index  $L$ ) that pertain to structural DOFs, and to the aerodynamic DOFs by taking into account the Øye dynamic stall model. The LM's forcing input  $F_{B,L}$  explicitly accounts for variations in aerodynamic forcing parameters ~~and dynamic stall~~ with respect to the per-blade inflow velocity change,  $\Delta V_{0,l}$ . To this end, ~~the LM solution both the LM and TDM solutions~~ for the state vector  $q$  ~~is are~~ computed  
 345 using a fourth-order Runge-Kutta (RK4) method with a fixed time step interval  $dt$ .

#### 4 Fast response methods and Hill's decomposition

The response  $q$  from the state-space model shown in Eq. (17) can be solved in the time domain directly. Yet, it can be beneficial to solve ~~it using the fast response calculation methodology the problem using a fast-response calculation~~ in the frequency domain or the Laplace  $s$ -domains ~~since~~. ~~To achieve this,~~ the state-space Eq. (17) ~~describes must be formulated for a linear~~  
 350 system ~~using the LM system matrix  $A_L$  and the corresponding linearized forcing vector  $F_{B,L}$ . The system matrix  $A_L$  is periodic and can be expressed as a sum of constant harmonic matrices via a double-sided Fourier series, allowing the system to be recast as LTI.~~ An advantage of a Laplace transform-based approach is that it captures accurately the transient response due to the consideration of initial conditions, just like for the TDM and LM. Conversely, the fast response methods using the Fourier transform neglect transient response effects from initial conditions.

355 Using the LM, the numerical procedures that are presented in this paper can be utilized for different load cases and for multiple floating wind turbine configurations such as with variable rotors (symmetric or asymmetric, different number of blades, isotropic or anisotropic blades), or variable floater types (spar-buoy, semi-submersible, damping pool floating foundation). The distinctions in simulations parameters can be as well in terms of the dynamic stall model that is considered or with the inclusion of a controller in the state-space model. All of these different simulation conditions would affect the LM system matrix  $A_L$   
 360 and the forcing vector  $F_L F_{B,L}$ .

To derive a Fourier transform-based fast response calculation procedure, the forcing term vector time series,  $F_B(t)$ , of a duration equal to the simulation time  $T_{sim}$ , is converted to the frequency domain. Similarly to the variable  $X(t)$ , both the forcing term vector  $F_B(t)$  and the state variable  $q(t)$  are expressed in the frequency domain as  $X(t) = \sum_{s=-N}^N X(\omega_s) e^{i\omega_s t}$ , where the frequency samples are defined as  $\omega_s = \frac{2\pi s}{T_{sim}}$  and  $i = \sqrt{-1}$  is the imaginary unit. This conversion is carried out in  
 365 order to compute the response  $q$  in the frequency domain.

We then utilize the FFT algorithm to obtain the frequency-domain forcing  $F_B(\omega) F_{B,L}(\omega)$ . The FFT-based methods, however, assume that the time signal is periodic within the simulation time frame. When this assumption does not apply, windowing functions are employed to remove the time signal edge effects. With this objective, we impose a window function  $W(t)$  on the time series of the LM input forcing vector  $F_{B,L}(t)$ .  ~~$F_{B,L}(\omega) = FFT(F_{B,L}(t) \cdot W(t))$~~   $F_{B,L}(\omega) = FFT\{F_{B,L}(t) \cdot W(t)\}$ .  
 370 The multiplication of the forcing input by the window function as  ~~$F_{B,L}(t) \cdot W(t)$~~   $F_{B,L}(t) \cdot W(t)$  serves to mitigate the effects of spectral leakage or aliases. The window function  $W(t) = R_1(t) \cdot R_2(t)$ , as illustrated in Fig. 2, is symmetric in time with the two ramp functions given by  $R_1(t) = \tanh^2\left(\frac{t}{f_{ramp} T_{\xi 5}}\right)$  and  $R_2(t) = \tanh^2\left(\frac{T_{sim}-t}{f_{ramp} T_{\xi 5}}\right)$   $R_2(t) = \tanh^2\left(\frac{T_{sim}-t}{f_{ramp} T_{\xi 5}}\right)$ . They are

time scaled by a ramping factor chosen as  $f_{ramp} = 2$  and by the largest natural period of the system that corresponds to the floater pitch natural period,  $T_{\xi_5} = 2\pi/\omega_{\xi_5}$ .

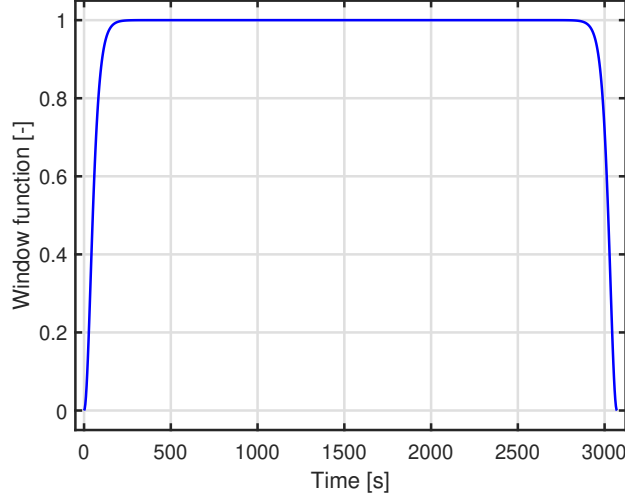

**Figure 2.** Window function  $W(t) = R_1(t) \cdot R_2(t)$  for a simulation duration of  $T_{sim} = 3071.2$  s.

375 One point worth mentioning is that through the application of the window function, the time span is reduced where the fast response results can be compared to the benchmark results. As can be seen in Fig. 2, the time lapse valid for comparison between results is located where the window function is equal to 1. The simulation time lost due to windowing (i.e. the portion valid for analysis) is smaller than the time lost due to the initial transient period.

380 Furthermore, the governing state-space Eq. (17) can be expressed in the frequency domain by converting the time-sampled terms into their frequency-domain representations, yielding

$$\sum_{s=-N}^N i\omega_s \mathbf{q}(\omega_s) e^{i\omega_s t} = \sum_{s=-N}^N ([\mathbf{A} \mathbf{q}]_{\omega_s} + \mathbf{F}_B(\omega_s)) e^{i\omega_s t}. \quad (22)$$

The cut-off frequency for the truncation in Eq. (22) must be sufficiently large to cover the wind spectrum. If matrix  $\mathbf{A}$  is constant, then after simplification of Eq. (22) we get  $(i\omega \mathbf{I} - \mathbf{A}) \mathbf{q}(\omega) = \mathbf{F}_B(\omega)$ , where  $\mathbf{I}$  is the identity matrix. Thus, the response vector  $\mathbf{q}(\omega)$  can be computed according to,

385 
$$\mathbf{q}(\omega) = \underbrace{(i\omega \mathbf{I} - \mathbf{A})^{-1}}_{\mathbf{H}(\omega)} \mathbf{F}_B(\omega), \quad (23)$$

which defines the transfer function matrix  $\mathbf{H}(\omega)$ . The core principle of fast response calculations is to convert the response solution from the frequency domain to the time domain using the inverse Fast Fourier Transform (iFFT) algorithm,  $\mathbf{q}(t) = \Re\{\text{iFFT}(\mathbf{q}(\omega))\}$  and then extracting only the real part of the result. The frequency-domain response signal  $\mathbf{q}(\omega)$  must be padded, which involves adding zeros to extend the data to the full length of the original time series before applying the inverse FFT.

390 To include the contribution of higher harmonics in the response  $\mathbf{q}(t)$ , we take inspiration in Hill's decomposition method for stability analysis of periodic systems and apply a double-sided Fourier decomposition ~~in to~~  $\mathbf{A}_L(t)$  and  $\mathbf{q}(t)$ . Hill's decomposition is related to previous studies that we performed for response (Pamfil et al., 2024) and stability (Pamfil et al., 2025) analyzes.

Hill's decomposition requires first the double-sided Fourier decomposition of time-periodic quantities such as  $\mathbf{A}_L(t)$  and  $\mathbf{q}(t)$ , which in general can be expressed for any periodic variable  $\mathbf{X}(t)$  as  $\mathbf{X}(t) = \sum_{n=-\infty}^{\infty} \mathbf{X}_n e^{in\Omega t}$ . In that case, each matrix  $\mathbf{A}_{L,n}$  is constant and both variables  $\mathbf{q}(t)$  and  $\mathbf{A}_L(t)$  are of dimension  $N_s$ . The frequency components  $\mathbf{X}_n$  of a time-dependent variable  $\mathbf{X}(t)$  ~~, such as  $\mathbf{A}_{L,n}$  for  $\mathbf{A}_L(t)$ ,~~ can be obtained using the numerical trapezoidal integration method, ~~i.e.~~ For instance, the frequency components  $\mathbf{A}_{L,n}$ , associated with  $\mathbf{A}_L(t)$ , can be computed as  $\mathbf{X}_n = \frac{1}{T} \int_0^T \mathbf{X}(t) e^{-in\Omega t} dt$ , where  $T = 2\pi/\Omega$  is the period of the system for a given constant rotational speed  $\Omega$ . Alternatively, since there are sufficient time samples over one  
400 period  $T$ , the FFT algorithm can be used ~~efficiently~~ instead to compute more efficiently the frequency components  $\mathbf{X}_n$ . The Fourier decomposition is defined as double-sided, ensuring that the system matrix of the LM,  $\mathbf{A}_L(t)$ , the state vector  $\mathbf{q}$ , and its time derivative  $\dot{\mathbf{q}}$  remain purely real. This is achieved by the cancellation of the imaginary components arising from the positive ( $+n\Omega$ ) and negative ( $-n\Omega$ ) harmonics, with a truncation upper limit of  $N = 4$  in this case study, ensuring an accurate Fourier expansion of  $\mathbf{A}_L(t)$ . As explained in our previous study (Pamfil et al., 2025), the Fourier decomposition of the system  
405 matrix  $\mathbf{A}_L(t)$  from Eq. (19) is valid due to the azimuthal periodicity of the system at a fixed rotational speed  $\Omega$ . This Fourier decomposition of the state-space variables for the free vibration case was introduced by Hill (1886) and it is commonly used for a stability analysis. Hill's theory allows to carry out a stability analysis of a floating wind turbine while taking into account the rotor's periodicity. For the unforced problem ( $\mathbf{F}_B = \mathbf{0}$  in Eq. (17)), the periodic eigenmodes  $\psi_k$  with principle eigenvector components  $\hat{\mathbf{v}}_{k,n}$ ,  $\psi_k = \sum_{n=-N}^N \hat{\mathbf{v}}_{k,n} e^{in\Omega t}$ , are found by substitution of the solution  ~~$\psi_{k,sol}(t) = \psi_k e^{\lambda_k t} \psi_{k,sol}(t) = \psi_k e^{\lambda_k t}$ ,~~  
410 which considers a principal eigenvalue  $\lambda_k$  per mode. This eigenvalue problem leads to the hyper-matrix LTI formulation for the unforced case given by  $\hat{\mathbf{q}} = \hat{\mathbf{A}}\hat{\mathbf{q}}$ :

$$\begin{bmatrix} \dot{\mathbf{q}}_{n=-1} \\ \dot{\mathbf{q}}_{n=0} \\ \dot{\mathbf{q}}_{n=1} \\ \vdots \end{bmatrix} = \begin{bmatrix} \ddots & \vdots & \vdots & \vdots & \ddots \\ \dots & \mathbf{A}_{L,0} + i\Omega\mathbf{I} & \mathbf{A}_{L,-1} & \mathbf{A}_{L,-2} & \dots \\ \dots & \mathbf{A}_{L,1} & \mathbf{A}_{L,0} & \mathbf{A}_{L,-1} & \dots \\ \dots & \mathbf{A}_{L,2} & \mathbf{A}_{L,1} & \mathbf{A}_{L,0} - i\Omega\mathbf{I} & \dots \\ \ddots & \vdots & \vdots & \vdots & \ddots \end{bmatrix} \begin{bmatrix} \mathbf{q}_{n=-1} \\ \mathbf{q}_{n=0} \\ \mathbf{q}_{n=1} \\ \vdots \end{bmatrix}, \quad (24)$$

which we have clarified in our work on floating wind turbine stability analysis (Pamfil et al., 2025).  $\hat{\mathbf{A}}$  is referred to as a hyper-matrix because it represents an infinite-dimensional block matrix coupling multiple harmonic components of the state vector. Each entry is itself a matrix acting on the states, resulting in a higher-order structure that can be interpreted as a tensor (or matrix of matrices) indexed by both harmonic components and states. More generally, a hyper-matrix can be viewed as an extension of a conventional matrix to a multidimensional array. That being said, we have proven (Pamfil et al., 2025) that the formulation of the hyper-matrix  $\hat{\mathbf{A}}$  can be found by replacing the Fourier decomposed terms  $\mathbf{q}(t)$  and  $\mathbf{A}_L(t)$  into the state-space Eq. (17) and rearranging them, ~~for derivations refer to~~. The corresponding derivations are provided in Eqs. (42), (43),

420 and (44) within our previous paper (Pamfil et al., 2025). Hence, by varying the index  $n$  from integer  $-N$  to  $N$  in Eq. (44) (Pamfil et al., 2025), the row equations of the hyper-matrix expression can be constructed. It should be noted that the harmonic matrices  $\mathbf{A}_{L,n}$  required for assembling  $\hat{\mathbf{A}}$  extend from  $\mathbf{A}_{L,n=-2N}$  to  $\mathbf{A}_{L,n=2N}$ . Moreover, under the assumption that the lower harmonics of matrix  $\mathbf{A}_L(t)$  are greater than the higher harmonics,

$$\|\mathbf{A}_{L,0}\|_F > \|\mathbf{A}_{L,\pm 1}\|_F > \|\mathbf{A}_{L,\pm 2}\|_F \dots, \quad (25)$$

425 the constant hyper-matrix  $\hat{\mathbf{A}}$  can be truncated and its eigenvalues would still be accurate.

Although Eq. (24) is derived for the unforced system, it suggests that the original LM may be recast into an LTI system with the hyper-matrix as a constant system matrix. One would need, however, to add the forcing term  $\mathbf{F}_{B,L}(t)$  which will generally have frequency content beyond the harmonics of the rotational frequency  $\Omega$ . Even though the central row in Eq. (24) appears to be the natural position for the forcing term  $\mathbf{F}_{B,L}(t)$ , this requires a formal assumption. In a previous study that  
430 we conducted (Pamfil et al., 2024), for a forced response excitation with a more simplified floating wind turbine model, this approach was tested with a corresponding forcing hyper-vector  $\hat{\mathbf{F}}_{B,L}(t) = [\dots, \mathbf{0}^T, \mathbf{F}_{B,L}^T(t), \mathbf{0}^T, \dots]^T$  (Pamfil et al., 2024). That produced identical results to the TDM that was linearized which can be confirmed by inspecting time series in Figs. 6, 7, 16, 17, 18 and 19 (Pamfil et al., 2024). Hence, in Section 5, we utilize Eq. (25) to formalize the perturbation methods for fast response computations, and de-couple Eq. (24) into smaller sub-systems.

435 To develop novel fast response methods, we take inspiration in Hill's decomposition and assemble a single-sided Fourier series by grouping together the positive and negative harmonic components of the same harmonic order in absolute value. The ~~variables  $e^{in\Omega t}$ , basis function  $e^{in\Omega t}$  and the variables  $q_n$~~  and  $\mathbf{A}_{L,n}$  are combined ~~as single terms within the single-sided Fourier decomposition through with~~ their complex conjugates (~~noted denoted  $*$~~ ) ~~to form single terms in the single-sided Fourier decomposition~~. When considering the complex conjugate of a harmonic term  $X_n$ , being  $X_n^*$ , it is known that  $X_{-n} =$   
440  $X_n^*$ , which conveys that  $\Re\{X_{-n}\} = \Re\{X_n\}$  and  $\Im\{X_{-n}\} = -\Im\{X_n\}$ . We apply this notion to obtain single-sided Fourier decompositions of  $q(t)$  and  $\mathbf{A}_L(t)$ . Each harmonic component now depends on the real ( $\Re\{\cdot\}$ ) and imaginary ( $\Im\{\cdot\}$ ) parts for variables  ~~$e^{in\Omega t}$ ,  $q(t)$  and  $\mathbf{A}_L(t)$~~ , ~~and for the basis function  $e^{in\Omega t}$~~ . This is outlined for the term  $X(t)$  which represents either variable  $q(t)$  or  $\mathbf{A}_L(t)$ :

$$\begin{aligned} X(t) &= \tilde{X}_0 + \tilde{X} \\ &= \tilde{X}_0 + \sum_{n=1}^N \tilde{X}_n \\ &= \tilde{X}_0 + \sum_{n=1}^N (X_n e^{in\Omega t} + X_{-n} e^{-in\Omega t}) \\ &= \tilde{X}_0 + \sum_{n=1}^N 2 (\Re\{X_n\} \Re\{e^{in\Omega t}\} - \Im\{X_n\} \Im\{e^{in\Omega t}\}) \\ &= \tilde{X}_0 + \sum_{n=1}^N (X_{n,c} \cos(n\Omega t) + X_{n,s} \sin(n\Omega t)). \end{aligned} \quad (26)$$

445 In Eq. (26), the average term  $X_0$  is written as  $\tilde{X}_0$  instead to ensure consistency in notation. Since the term  $X(t)$  is purely real, Eq. (26) demonstrates that the double-sided complex Fourier series (exponential form) can also be expressed as the single-sided real Fourier series (sine-cosine form). The exponential form of the Fourier series translates to a sine-cosine form, where, for each index  $n$ , the real cosine and sine coefficients  $X_{n,c}$  and  $X_{n,s}$  are associated with the complex coefficient  $X_n$ .

## 5 Perturbation methods

450 We develop fast response methods by relying on the Hill expansion [for both the LM system matrix  \$\mathbf{A}\_L\$  and the state response vector  \$\mathbf{q}\$](#) . We recast the Hill expansion instead as a Taylor expansion with a small formal ordering parameter  $\delta^n$  which multiplies the corresponding harmonic terms of order  $n$ :

$$\begin{aligned} \mathbf{q}(t) &= \sum_{n=-N}^N \delta^{|n|} \mathbf{q}_n(t) e^{in\Omega t} = \tilde{\mathbf{q}}_0(t) + \sum_{n=1}^N \delta^n \tilde{\mathbf{q}}_n(t) \\ \mathbf{A}_L(t) &= \sum_{n=-N}^N \delta^{|n|} \mathbf{A}_{L,n} e^{in\Omega t} = \tilde{\mathbf{A}}_{L,0} + \sum_{n=1}^N \delta^n \tilde{\mathbf{A}}_{L,n}(t). \end{aligned} \quad (27)$$

As done in Eq. (26), the negative and positive harmonic terms from the double-sided Fourier expansion,  $X_{-n}e^{-in\Omega t}$  and  $X_n e^{in\Omega t}$ , are combined together as terms of the same harmonic order within a single-sided Fourier series. According to the perturbation method (Bender and Orszag, 1999), the harmonic ordering is explicitly carried out through a perturbative decomposition,  $X(t) = \tilde{X}_0 + \sum_{n=1}^N \delta^n \tilde{X}_n(t)$ , where the harmonic terms originate from the single-sided Fourier series. The higher harmonics response contributions  $\tilde{\mathbf{q}}_n(t)$  are solved up to a desired order  $n$ . In the following Sections 5.1 and 5.2, we will present the double and single perturbation methods to achieve this.

### 460 5.1 Double perturbation method

Our first perturbation method is obtained through insertion of the perturbation expansions from Eq. (27) into the state-space model from Eq. (17). After applying this perturbative decomposition to the state-space ODE terms we get:

$$\sum_{n=0}^N \dot{\tilde{\mathbf{q}}}_n \delta^n = \sum_{p=0}^N \sum_{j=0}^N \tilde{\mathbf{A}}_{L,j} \tilde{\mathbf{q}}_p \delta^{(p+j)} + \mathbf{F}_{B,L}. \quad (28)$$

The Hill decomposition of the matrix  $\mathbf{A}_L$  into its harmonics  $\mathbf{A}_{L,j}$  can be performed without needing to extract the harmonics from the hyper-matrix  $\hat{\mathbf{A}}$ .

Concerning the LM forcing input  $\mathbf{F}_{B,L}$ , it is only associated to the unit perturbation of  $\delta^0 = 1$  which is linked to the zeroth harmonic order.

[It is generated with the window function  \$W\(t\)\$  applied, refer to Fig. 2.](#) Continuing from Eq. (28), we can isolate each  $n^{th}$  set of equations of the same order of magnitude  $\delta^n$ . We can identify the zeroth harmonic equation through the zeroth perturbation order  $\delta^0$  as shown in Eq. (29). The zeroth harmonic response  $\tilde{\mathbf{q}}_0$  can be calculated through the transfer function  $\mathbf{H}(\omega)$ , see Eq. (23).

Bir (2008) has shown that considering only the averaged system matrix  $\tilde{\mathbf{A}}_{L,0}$  over a period means neglecting periodic terms that can contribute to the system dynamics. ~~As we supported with a more simplified floating wind turbine model (Pamfil et al., 2024), for~~ For some load cases, the zeroth order response,  $\tilde{\mathbf{q}}_0$ , is insufficient to account for the total response  $\mathbf{q}$  when the latter is highly periodic. This observation has also been noted in the results generated using a more simplified floating wind turbine model; see Fig. 19 of the prior investigation (Pamfil et al., 2024). We have demonstrated (Pamfil et al., 2024) that the zeroth harmonic state response  $\tilde{\mathbf{q}}_0$  is also equivalent to solving in the frequency domain the zeroth order structural DOF vector  $\tilde{\mathbf{x}}_0(\omega)$  from the LM EOM (Eq. (14)) with zeroth order mass, damping and stiffness matrices. Using Furthermore, using the LM EOM is the conventional way of solving the floating wind turbine response in the frequency domain. Consequently, based on Eq. (28), we build a system of equations to solve consecutively higher-order contributions in the following manner:

$$\begin{aligned}
\delta^0 : \quad & \dot{\tilde{\mathbf{q}}}_0(t) = \tilde{\mathbf{A}}_{L,0}\tilde{\mathbf{q}}_0 + \mathbf{F}_{B,L} \\
\delta^1 : \quad & \dot{\tilde{\mathbf{q}}}_1(t) = \tilde{\mathbf{A}}_{L,0}\tilde{\mathbf{q}}_1 + \tilde{\mathbf{A}}_{L,1}\tilde{\mathbf{q}}_0 \\
& \vdots \\
\delta^n : \quad & \dot{\tilde{\mathbf{q}}}_n(t) = \sum_{j=0}^n \tilde{\mathbf{A}}_{L,j}\tilde{\mathbf{q}}_{n-j} = \tilde{\mathbf{A}}_{L,0}\tilde{\mathbf{q}}_n + \sum_{j=1}^n \tilde{\mathbf{A}}_{L,j}\tilde{\mathbf{q}}_{n-j}, \quad n > 0.
\end{aligned} \tag{29}$$

After solving the zeroth harmonic response,  $\tilde{\mathbf{q}}_0$ , the sequential solving strategy from Eq. (29) is implemented for higher-order harmonic ( $n > 0$ ) responses  $\tilde{\mathbf{q}}_n$ . It can be expressed in a lower triangular hyper-matrix form,

$$\begin{aligned}
485 \quad \begin{bmatrix} \dot{\tilde{\mathbf{q}}}_0 \\ \dot{\tilde{\mathbf{q}}}_1 \\ \dot{\tilde{\mathbf{q}}}_2 \\ \vdots \end{bmatrix} &= \begin{bmatrix} \tilde{\mathbf{A}}_{L,0} & \mathbf{0} & \mathbf{0} & \dots \\ \tilde{\mathbf{A}}_{L,1} & \tilde{\mathbf{A}}_{L,0} & \mathbf{0} & \dots \\ \tilde{\mathbf{A}}_{L,2} & \tilde{\mathbf{A}}_{L,1} & \tilde{\mathbf{A}}_{L,0} & \dots \\ \vdots & \vdots & \vdots & \ddots \end{bmatrix} \begin{bmatrix} \tilde{\mathbf{q}}_0 \\ \tilde{\mathbf{q}}_1 \\ \tilde{\mathbf{q}}_2 \\ \vdots \end{bmatrix} + \begin{bmatrix} \mathbf{F}_{B,L} \\ \mathbf{0} \\ \mathbf{0} \\ \vdots \end{bmatrix}.
\end{aligned} \tag{30}$$

Eq. (30) would be solved through a forward substitution similarly to the iterative method of Gauss–Seidel with successive displacement. This iterative solving protocol is identical to the double perturbation method presented in Eq. (29). While the original linear problem expressed through Eqs. (17) and (27) corresponds in Eq. (29) to the sum of the equations in one operation, the perturbation approach breaks this in smaller sub-problems which are solved sequentially.

490 In summary, the higher-order harmonic responses  $\tilde{\mathbf{q}}_n$  ( $n > 0$ ) are computed successively in the frequency domain (see Eq. (23)) as follows

$$\tilde{\mathbf{q}}_n(\omega) = \underbrace{(i\omega\mathbf{I} - \tilde{\mathbf{A}}_{L,0})^{-1}}_{\mathbf{H}(\omega)} \sum_{j=1}^n \tilde{\mathbf{A}}_{L,j}\tilde{\mathbf{q}}_{n-j}(\omega), \tag{31}$$

where  $\mathbf{H}(\omega)$  is the transfer function and  $\sum_{j=1}^n \tilde{\mathbf{A}}_{L,j}\tilde{\mathbf{q}}_{n-j}(\omega)$  is the numerical forcing term. In the end, we calculate the full response by summing all response harmonics according to Eq. (27), and by converting the solution to the time domain via the 495 iFFT algorithm.

## 5.2 Single perturbation method

As an alternative to the perturbative expansion in Eq. (27), the system matrix  $\mathbf{A}_L(t)$  can be expressed as a zeroth- and first-order perturbation of  $\varepsilon$ , encompassing all higher harmonic contributions, such that  $\mathbf{A}_L(t) = \tilde{\mathbf{A}}_{L,0} + \varepsilon \tilde{\mathbf{A}}_L(t)$ . The small perturbation of  $n^{\text{th}}$  order,  $\varepsilon^n$ , is applied to the response  $\mathbf{q}(t)$  harmonics and to its time derivative  $\dot{\mathbf{q}}(t)$  harmonics. That is equivalent to the double perturbation approach applied to  $\mathbf{q}(t)$  and  $\dot{\mathbf{q}}(t)$  which results in  $\mathbf{q}(t) = \tilde{\mathbf{q}}_0 + \sum_{n=1}^N \varepsilon^n \tilde{\mathbf{q}}_n$ . The insertion of these perturbation expressions for  $\mathbf{A}_L(t)$  and  $\dot{\mathbf{q}}(t)$  into Eq. (17) yields

$$\dot{\tilde{\mathbf{q}}}_0 + \sum_{n=1}^N \varepsilon^n \dot{\tilde{\mathbf{q}}}_n = \mathbf{F}_{B,L} + \left( \tilde{\mathbf{A}}_{L,0} + \varepsilon \tilde{\mathbf{A}}_L \right) \left( \tilde{\mathbf{q}}_0 + \sum_{n=1}^{N-1} \varepsilon^n \tilde{\mathbf{q}}_n \right) + \varepsilon^N \tilde{\mathbf{A}}_{L,0} \tilde{\mathbf{q}}_N. \quad (32)$$

The cumulative contribution of higher-order harmonics terms is expanded to identify terms for each power of  $\varepsilon$ . That gives the following sequence of equations that can each be solved through the transfer function  $\mathbf{H}(\omega)$  as in Eq. (31):

$$\begin{aligned} \varepsilon^0 : \quad \dot{\tilde{\mathbf{q}}}_0(t) &= \tilde{\mathbf{A}}_{L,0} \tilde{\mathbf{q}}_0 + \mathbf{F}_{B,L} \\ \varepsilon^1 : \quad \dot{\tilde{\mathbf{q}}}_1(t) &= \tilde{\mathbf{A}}_{L,0} \tilde{\mathbf{q}}_1 + \tilde{\mathbf{A}}_L \tilde{\mathbf{q}}_0 \\ &\vdots \\ \varepsilon^n : \quad \dot{\tilde{\mathbf{q}}}_n(t) &= \tilde{\mathbf{A}}_{L,0} \tilde{\mathbf{q}}_n + \tilde{\mathbf{A}}_L \tilde{\mathbf{q}}_{n-1}, \quad n > 0. \end{aligned} \quad (33)$$

In contrast to the double perturbation method, the decomposition of  $\mathbf{A}_L(t)$  can be achieved without a full Hill expansion, because  $\tilde{\mathbf{A}}_{L,0}$  can be calculated by averaging  $\mathbf{A}_L(t)$  over one period  $T = 2\pi/\Omega$  and  $\tilde{\mathbf{A}}_L(t) = \mathbf{A}_L(t) - \tilde{\mathbf{A}}_{L,0}$ .

Just like for the double perturbation, additional insight can be gained by observing that the single perturbation method in Eq. (33) can be expressed as well by a lower triangular hyper-matrix formulation,

$$\begin{bmatrix} \dot{\tilde{\mathbf{q}}}_0 \\ \dot{\tilde{\mathbf{q}}}_1 \\ \dot{\tilde{\mathbf{q}}}_2 \\ \vdots \end{bmatrix} = \begin{bmatrix} \tilde{\mathbf{A}}_{L,0} & \mathbf{0} & \mathbf{0} & \dots \\ \tilde{\mathbf{A}}_L & \tilde{\mathbf{A}}_{L,0} & \mathbf{0} & \dots \\ \mathbf{0} & \tilde{\mathbf{A}}_L & \tilde{\mathbf{A}}_{L,0} & \dots \\ \vdots & \vdots & \vdots & \ddots \end{bmatrix} \begin{bmatrix} \tilde{\mathbf{q}}_0 \\ \tilde{\mathbf{q}}_1 \\ \tilde{\mathbf{q}}_2 \\ \vdots \end{bmatrix} + \begin{bmatrix} \mathbf{F}_{B,L} \\ \mathbf{0} \\ \mathbf{0} \\ \vdots \end{bmatrix}, \quad (34)$$

where the responses  $\tilde{\mathbf{q}}_n$  can be solved similarly to the Gauss-Seidel method of successive displacement (forward substitution).

Finally, the solution of Eq. (33) is computed sequentially in the frequency domain the same way as for the double perturbation method. Once all response harmonics have been computed, they are summed together and converted from the frequency domain to the time domain using the inverse Fast Fourier transform.

## 5.3 Laplace transform

An alternative to calculating the system response in the frequency domain using the FFT algorithm is to compute it in the Laplace  $s$ -domain using the Laplace transform. To calculate the response in the  $s$ -domain the system is assumed to be LTI and the state-space ODE from Eq. (17) is analytically transformed into an algebraic equation. Furthermore, the Laplace method

proceeds in the same manner as the Fourier transform, to solve the system response in the new domain, and then apply the  
 520 inverse of the transform to convert it back to the time domain. However, for high-order systems or those with multiple inputs  
 and outputs, performing an analytical symbolic inversion of the Laplace transform can be challenging or impractical, frequently  
 requiring the application of numerical inversion methods. The benefit, in comparison with the Fourier transform method, is that  
 it is capable of considering the initial conditions and transient response, such as for decay tests. The initial condition  $\mathbf{q}(t = 0)$   
 is taken into account through a time step looping computation procedure where the current time step  $t_i$  response is calculated  
 525 using the previous time step  $t_{i-1}$ , and there is a very small constant time step increment  $dt$ . This approach does simultaneously  
 solve well the non-transient response too.

Using Eq. (33), we apply the single perturbation approach by carrying out the sum of harmonics response results, i.e.  
 $\tilde{\mathbf{q}} = \sum_{n=0}^N \tilde{\mathbf{q}}_n$ , only up to the first-order harmonic  $\tilde{\mathbf{q}}_1$ . As a starting point, the zeroth harmonic expression that is found in Eq.  
 (33) can be converted to the  $s$ -domain. This conversion is carried out through the Laplace transform applied on the left- and  
 530 right-hand side,

$$\mathcal{L}\{\dot{\tilde{\mathbf{q}}}_0(t)\} = \tilde{\mathbf{A}}_{L,0} \mathcal{L}\{\tilde{\mathbf{q}}_0(t)\} + \mathcal{L}\{\mathbf{F}_{B,L}(t)\} \quad t \in [t_{i-1}, t_i]. \quad (35)$$

The Laplace transform in Eq. (35) is applied locally at each time step  $t_i$ , over the time interval  $[t_{i-1}, t_i]$ , which has a duration  
 equal to the time step interval  $dt$ . This suggests that the initial condition for that time interval is taken as  $\tilde{\mathbf{q}}_0(t_{i-1})$ , and  $\mathbf{F}_{B,L}(t_i)$   
 is assumed to be constant during that time interval.

535 Although a midpoint evaluation of the forcing vector,  $\mathbf{F}_{B,L}(t_{i-1} + dt/2)$ , is commonly used in staggered time-stepping  
 schemes to achieve a second-order accuracy in time responses  $\mathbf{q}(t)$ , the resulting improvement is not expected to be significant  
 in the present context. Given the chosen sufficiently small time step increment  $dt$ , the dominant discrepancies between the  
 linear and time-domain models stem from modeling and linearization assumptions rather than from time integration error. A  
 midpoint forcing would require additional model evaluations at intermediate time instants,  $t_{i-1} + dt/2$ . This would increase  
 540 the computational cost since the forcing vector time series is already evaluated at each standard discrete time step,  $t_{i-1}$ . For  
 these reasons, in the present work a first-order treatment of the forcing vector is adopted for simplicity and computational  
 efficiency.

In addition, there is no window function  $W(t)$  applied here to the forcing term  $\mathbf{F}_{B,L}(t)$ . After applying the Laplace transform  
 in Eq. (35), it equates to

$$s \tilde{\mathbf{q}}_0(s) - \tilde{\mathbf{q}}_0(t_{i-1}) = \tilde{\mathbf{A}}_{L,0} \tilde{\mathbf{q}}_0(s) + \underbrace{\frac{1}{s} \mathbf{F}_{B,L}(t_i)}_{\mathbf{F}_{B,L}(s)}. \quad (36)$$

The  $s$ -domain contains a real part  $\sigma$  and an imaginary part  $i\omega$ , resulting in  $s = \sigma + i\omega$ . The Fourier transform is a particular  
 case of the bilateral Laplace transform where the initial conditions are neglected, i.e.  $s = i\omega$  and  $\sigma = 0$ .

Based on Eq. (36),  $\tilde{\mathbf{q}}_0(s)$  can be isolated:

$$\mathcal{L}^{-1}\{\tilde{\mathbf{q}}_0(s)\} = \mathcal{L}^{-1}\left\{\left(s\mathbf{I} - \tilde{\mathbf{A}}_{L,0}\right)^{-1} \left(\frac{1}{s} \mathbf{F}_{B,L}(t_i) + \tilde{\mathbf{q}}_0(t_{i-1})\right)\right\}. \quad (37)$$

550 The inverse of the Laplace transform is applied to solve the state response  $\mathcal{L}^{-1}\{\tilde{q}_0(s)\} = \tilde{q}_0(t_i)$  similarly to the inverse of the FFT for the previous fast response methods. The transfer function  $\mathbf{H}(s) = (s\mathbf{I} - \tilde{\mathbf{A}}_{L,0})^{-1}$  in Eq. (37) is similar to the transfer function for the frequency domain from Eq. (31). The inverse of the Laplace transform is applied to Eq. (37) so that it can be solved only once through a symbolic solver, such as MATLAB's symbolic inverse Laplace function `ilaplace`. The terms that are a function of the current time step  $t_i$  and previous time step  $t_{i-1}$  are treated as constants when solving symbolically Eq. 555 (37). Also, when solving Eq. (37) numerically at each time step, the time variable  $t$  is replaced by the time step increment  $dt$ . Afterwards, the same strategy as in Eq. (37) is applied, with a change of variables, to solve the first-order harmonic response  $\tilde{q}_1(t_i)$  at time step  $t_i$ :

$$\mathcal{L}^{-1}\{\dot{\tilde{q}}_1(s)\} = \mathcal{L}^{-1}\left\{\left(s\mathbf{I} - \tilde{\mathbf{A}}_{L,0}\right)^{-1}\left(\frac{1}{s}\tilde{\mathbf{A}}_L\mathbf{q}_0(t_i) + \tilde{q}_1(t_{i-1})\right)\right\}. \quad (38)$$

We ~~establish~~ impose the initial condition ~~( $t=0$ ) at  $t=0$~~  for Eq. (38) ~~that  $\tilde{q}_1(t_1) = \mathbf{0}$  as  $\tilde{q}_1(t_1) = \mathbf{0}$~~  for the first time step, since 570  ~~$\tilde{q}_0(t_1) = \mathbf{q}(t=0)$~~   $\tilde{q}_0(t_1) = \mathbf{q}(t=0)$ . Further, as given by Eq. (27), the response  $\tilde{q}_1(t)$  is added to the zeroth harmonic solution  $\tilde{q}_0(t)$  to obtain the system response  $\mathbf{q}(t)$ .

Due to the computationally expensive time iteration procedure, we settle for an accuracy going up only to the first-order harmonic  $\tilde{q}_1(t)$  response. Given the time loop nature of this method, we found out that it was not fast, but had a comparable CPU time as the standard time integration of the LM state-space. ~~Hence, Therefore, for transient response analyses involving~~ 575 longer simulations, it may be more efficient to directly employ the LM approach rather than the single-perturbation Laplace transform method. That being said, we benchmark the CPU time and accuracy in the following Sections. More details about the computational efficiency are explained in Section 7.

## 6 Results from fast response methods

We present the fast response methods time series and Power Spectral Density (PSD) results for various load cases for the 570 operational point of  $V_0 = 8 \text{ ms}^{-1}$  and  $\Omega = 0.6 \text{ rads}^{-1}$ . The simulation duration is  $T_{\text{sim}} = 3071.2 \text{ s}$ , as illustrated in Fig. 2, which depicts a window function applied to the time series in the context of a Fourier-based fast response method. Since this study does not ~~take into account~~ include a controller implementation, we select arbitrarily an operational point below the rated ~~velocity, such as  $V_0 = 11.4 \text{ ms}^{-1}$~~  wind speed  $V_r$ , namely  $V_r = 11.4 \text{ ms}^{-1}$ , as defined for the DTU 10 MW reference wind turbine (Bak et al., 2013). This operational condition is used in this entire paper for all simulations load cases. Results are 575 compared between the TDM, the time-dependent LM, the Fourier-based fast response methods and the Laplace-based method. For the Fourier-based and Laplace-based methods, the zeroth harmonic solution serves as the starting point, and its accuracy is increased through the single and double perturbation (Pert.) approaches, with accuracies reaching up to second harmonic order:  $O(\varepsilon^2)$  and  $O(\delta^2)$  respectively. The TDM results serve as a benchmark to ~~validate~~ verify if the LM is in accordance with what would be expected, but not as a means to evaluate the accuracy of the fast response and Laplace-based results which should 580 be compared rather with the LM. It has been proven in our previous investigations (Pamfil et al., 2024), that the LTI system using Hill's hyper-matrix from Eq. (24), with an accurate Fourier expansion, produces time series results identical to those of

the LM. In terms of accuracy analysis for load cases with a stochastic input forcing, the exceedance probabilities for signals are extracted as the positive response peaks distance from the mean (steady-state) values.

We compare time- and frequency-domain results for the floater pitch angle  $\xi_5$ , as well as the first blade's ( $l = 1$ ) deflection amplitude  $a_1$  and dynamic stall separation function  $f_{s,1}$ . The response results for a single blade only suffice to describe the accuracy of the response calculation methods.

Prior studies using other frequency-domain solvers, such as RAFT, SLOW, and QuLAF which are mentioned in the Introduction, do not account for the azimuthal variation of linearized aerodynamic blade loads. Instead, they typically model the rotor load as concentrated at the hub. These studies often compare either frequency- or Laplace-domain results with time-domain simulations obtained from time-domain models, experiments, or higher-fidelity simulations (e.g. [CFD-Computational Fluid Dynamics](#) or hydro- and aero-elastic solvers). However, they do not investigate different techniques for both frequency- and Laplace-domain simulations of azimuthally dependent linearized aerodynamic loads, nor do they assess the accuracy in comparison to both a linear and a more accurate time-domain model. Furthermore, the simplified floating wind turbine developed in this work offers a lower accuracy compared to more sophisticated aero-elastic solvers. Due to these differences in how aerodynamic and hydrodynamic loads are modeled, direct comparisons with previous models or experimental data are not feasible. The loading and structural modeling approaches used in previous studies differ significantly from the one presented here, limiting the applicability of benchmarking against high-fidelity numerical models or experimental results. Rather than serving as a benchmark tool, the simplified model introduced in this study is intended to explore differences between time-domain, linearized, and fast-response methods. Its streamlined formulation provides clear insights into system dynamics and method performance, complementing, rather than replacing, more detailed aero-elastic solvers such as HAWC2, Bladed, OpenFAST, or SIMA.

In this paper, five different load cases are analyzed where different inflow velocity and floater pitch moment  $M_F$  are considered. The load cases distinctions are summarized in Table 1.

**Table 1.** Simulations load cases for the operational point of  $V_0 = 8 \text{ m s}^{-1}$  and  $\Omega = 0.6 \text{ rad s}^{-1}$

| Load Case | Aero: Inflow velocity |         |           | Hydro: Floater pitching moment |            |
|-----------|-----------------------|---------|-----------|--------------------------------|------------|
|           | Constant              | Sheared | Turbulent | Harmonic                       | Stochastic |
| A         | ✓                     |         |           | ✓                              |            |
| B         |                       | ✓       |           | ✓                              |            |
| C         |                       |         | ✓         | ✓                              |            |
| D         | ✓                     |         |           |                                | ✓          |
| E         |                       | ✓       | ✓         |                                | ✓          |

The inflow velocity can either be constant, modified by a sheared perturbation, or influenced by coherent turbulence, which is stochastic in nature and characterized by a turbulence intensity (TI) of 5.77%. [Higher turbulence intensity values, reaching up to 10% or 15%, would still satisfy the underlying modeling assumptions. This claim is supported by the results obtained for load cases C and E, which include stochastic wind inflow effects and are presented in Sections 6.3 and 6.5, respectively.](#)

610 These results indicate that the impact of wind turbulence intensity on the system response can be adequately captured even by a zeroth-order harmonic response, as increasing turbulence intensity leads to a stronger dominance of the zeroth-order harmonic contribution in the system response. As for the floater pitch moment, it can be harmonic or stochastic. Among the load cases presented in Table 1, Case *E* is considered the most realistic, as it accounts for a stochastic inflow velocity, a stochastic floater pitch moment, and a sheared inflow velocity profile.

### 6.1 Load case A: constant inflow and harmonic floater forcing

615 For the load case *A* in Fig. 3, the inflow velocity is constant, and the time series indicate that the zeroth harmonic is insufficient to characterize accurately the blade responses compared to the full LM. A graphically good agreement, however, is seen for the first- and higher-order version of all the fast response methods and the Laplace-based method.

The log-scaled PSD plots in the blades DOFs,  $a_1$  and  $f_{s,1}$ , indicate energy peaks at the frequencies distanced at  $-\Omega$  (-1P) and  $\Omega$  (1P) away from the floater excitation frequency  $\Omega_M$ . This demonstrates the frequency coupling caused by the periodic terms in the inertia matrix, also referred to as the mass matrix.

620 Regarding the floater pitch angle  $\xi_5$ , mainly  $\Omega_M$  is influential on the floater pitch motion considering the high PSD peak occurring at that frequency. The DOF's own natural frequency is not noticeable at  $\omega_{\xi_5}$  because the transient response is omitted in the PSD computation. For the blades DOFs PSDs,  $a_1$  and  $f_{s,1}$ , the natural frequency  $\omega_{\xi_5}$ 's influence on the response is again not visible for the same aforementioned reason.

625 In a nutshell, the responses show energy peaks caused by the periodic inertia of the system. Due to the presence of a high aerodynamic damping, all results, irrespective of the load case, do not capture the blade's natural frequency  $\omega_{1f}$ .

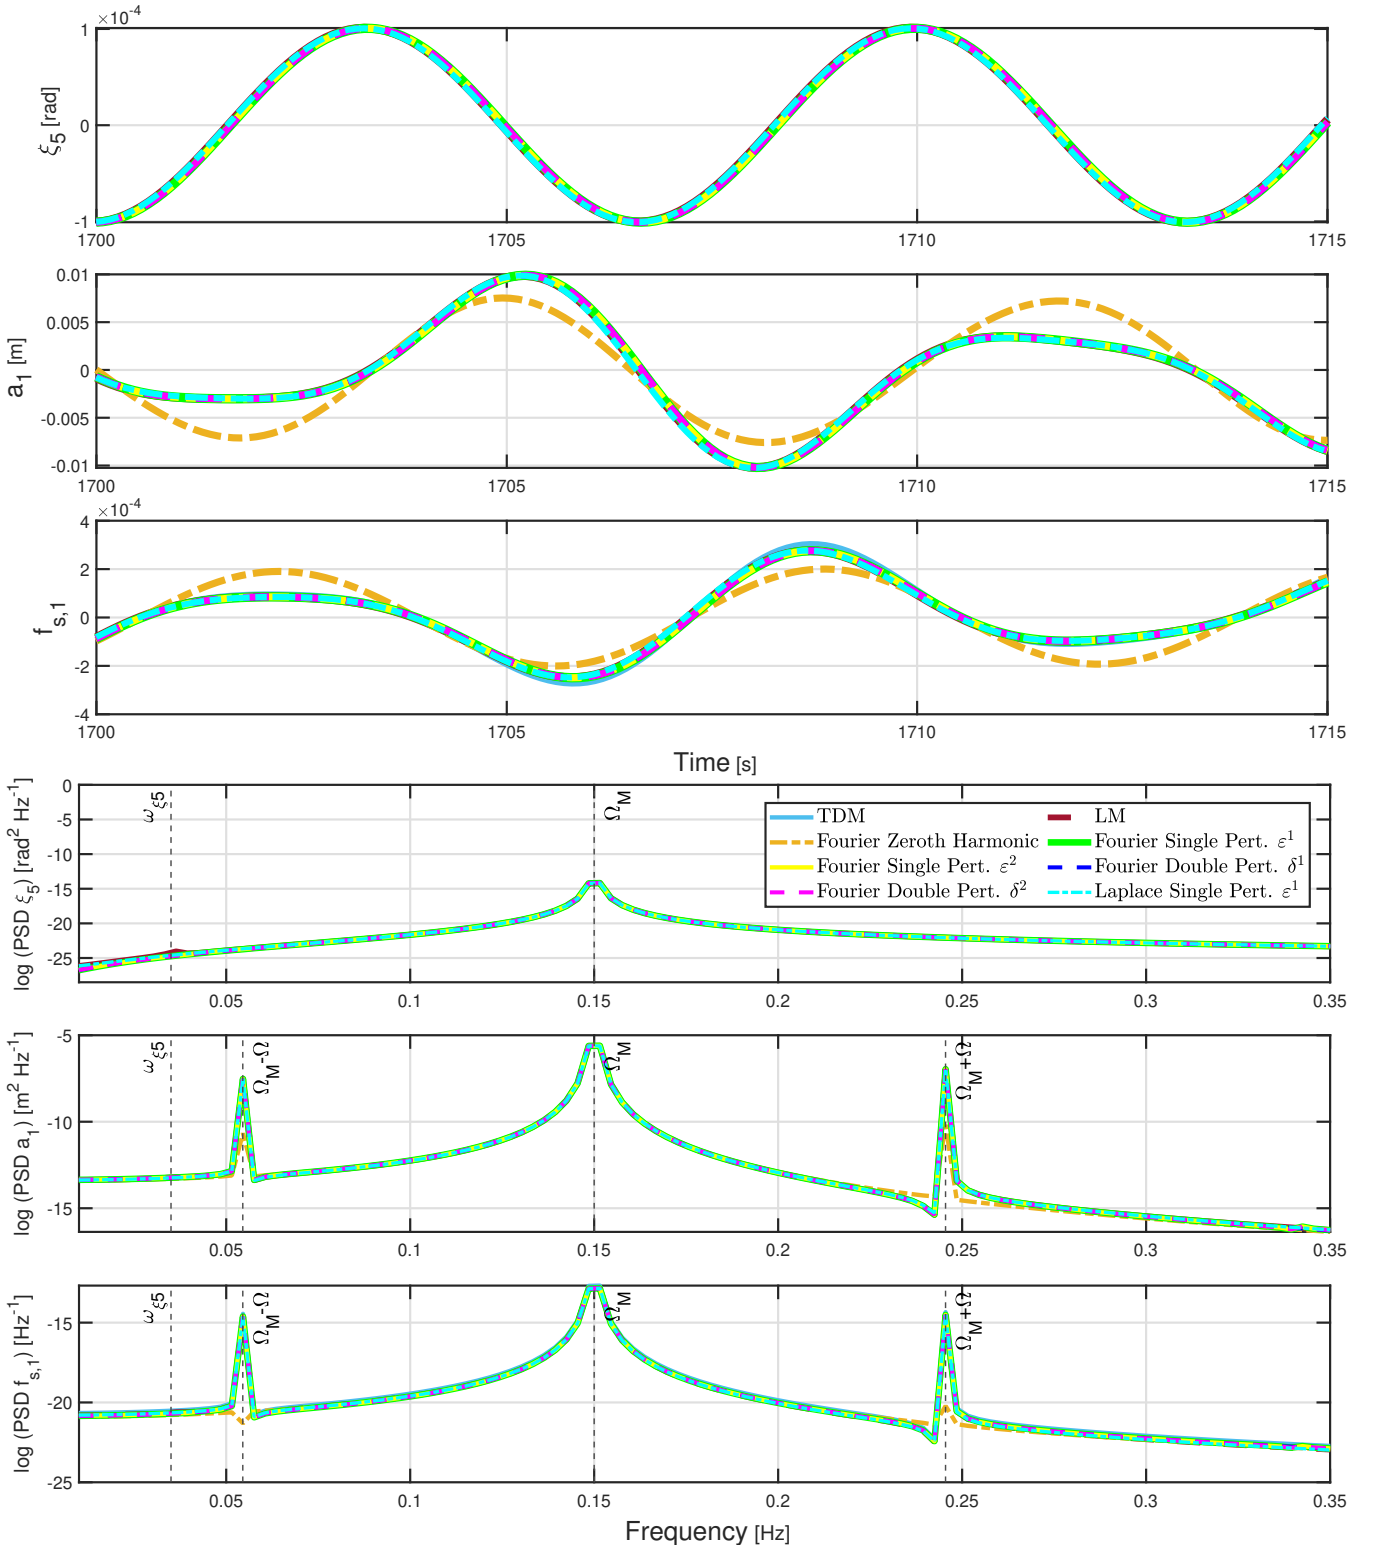

**Figure 3.** Time series and PSD plots for load case *A* with the operational point of  $V_0 = 8 \text{ m s}^{-1}$  and  $\Omega = 0.6 \text{ rad s}^{-1}$ , and for a simulation duration of  $T_{\text{sim}} = 3071.2 \text{ s}$ .

## 6.2 Load case *B*: sheared inflow and harmonic floater forcing

The responses in Fig. 4 for load case *B* are associated to a sheared inflow velocity and are highly periodic as indicated by the PSD plots. The LM, fast response and the Laplace approaches all produce seemingly identical results, where higher-order harmonic corrections do not appear to have any contribution. This implies that the accuracy of the methods is not improved with higher harmonics response considerations for this load case.

The main frequency that is visible in the blade channels,  $a_1$  and  $f_{s,1}$ , is  $\Omega$  (1P), and the floater harmonic excitation frequency  $\Omega_M$  in the  $\xi_5$  channel. Smaller PSD peaks are observable in the blade channels at the excitation frequencies  $\Omega_M$  and  $\Omega_M + \Omega$ , with only a barely discernible peak at  $\Omega_M - \Omega$ . The rotational speed frequency  $\Omega$  is distinguishable in the time series channels for the blade DOFs, due to the strong influence of the sheared inflow which creates a periodic aerodynamic load. The TDM PSD plots for the ~~blades DOFs,  $a_1$  and  $f_{s,1}$ , capture blade DOFs,  $a_1$  and  $f_{s,1}$ , exhibit~~ additional peaks at ~~other integers integer multiples~~ of the rotational speed, ~~meaning at such as~~  $2\Omega$  (2P) and  $3\Omega$  (3P)~~for example. This demonstrates the higher harmonic. This highlights higher-harmonic~~ coupling effects captured by the TDM but not by the LM ~~and nor by~~ other response methods~~due to the dominating effect of other. Hence, the PSD responses for all methods show dominant peaks at~~ frequencies related to ~~the frequency both  $\Omega$  and  $\Omega_M$ , including  $\Omega_M + \Omega$ , but only the TDM captures additionally the harmonics  $2\Omega$  and  $3\Omega$ . This indicates that the TDM system matrix  $\mathbf{A}_T(t)$  accounts for higher-order coupling mechanisms that emerge at higher harmonic frequencies, most prominently in the  $f_{s,1}$  channel.~~

For the floater pitch DOF  $\xi_5$ 's channel, like in load case *A*, mainly the floater pitch moment excitation frequency  $\Omega_M$  is captured in the PSD plot, and the sinusoidal motion of the floater is visible in the time series plot. Similarly to the load case *A* as well, the natural frequency  $\omega_{\xi_5}$  is not apparent on any channel's PSD plot since the transient response is not taken into account for the PSD calculation.

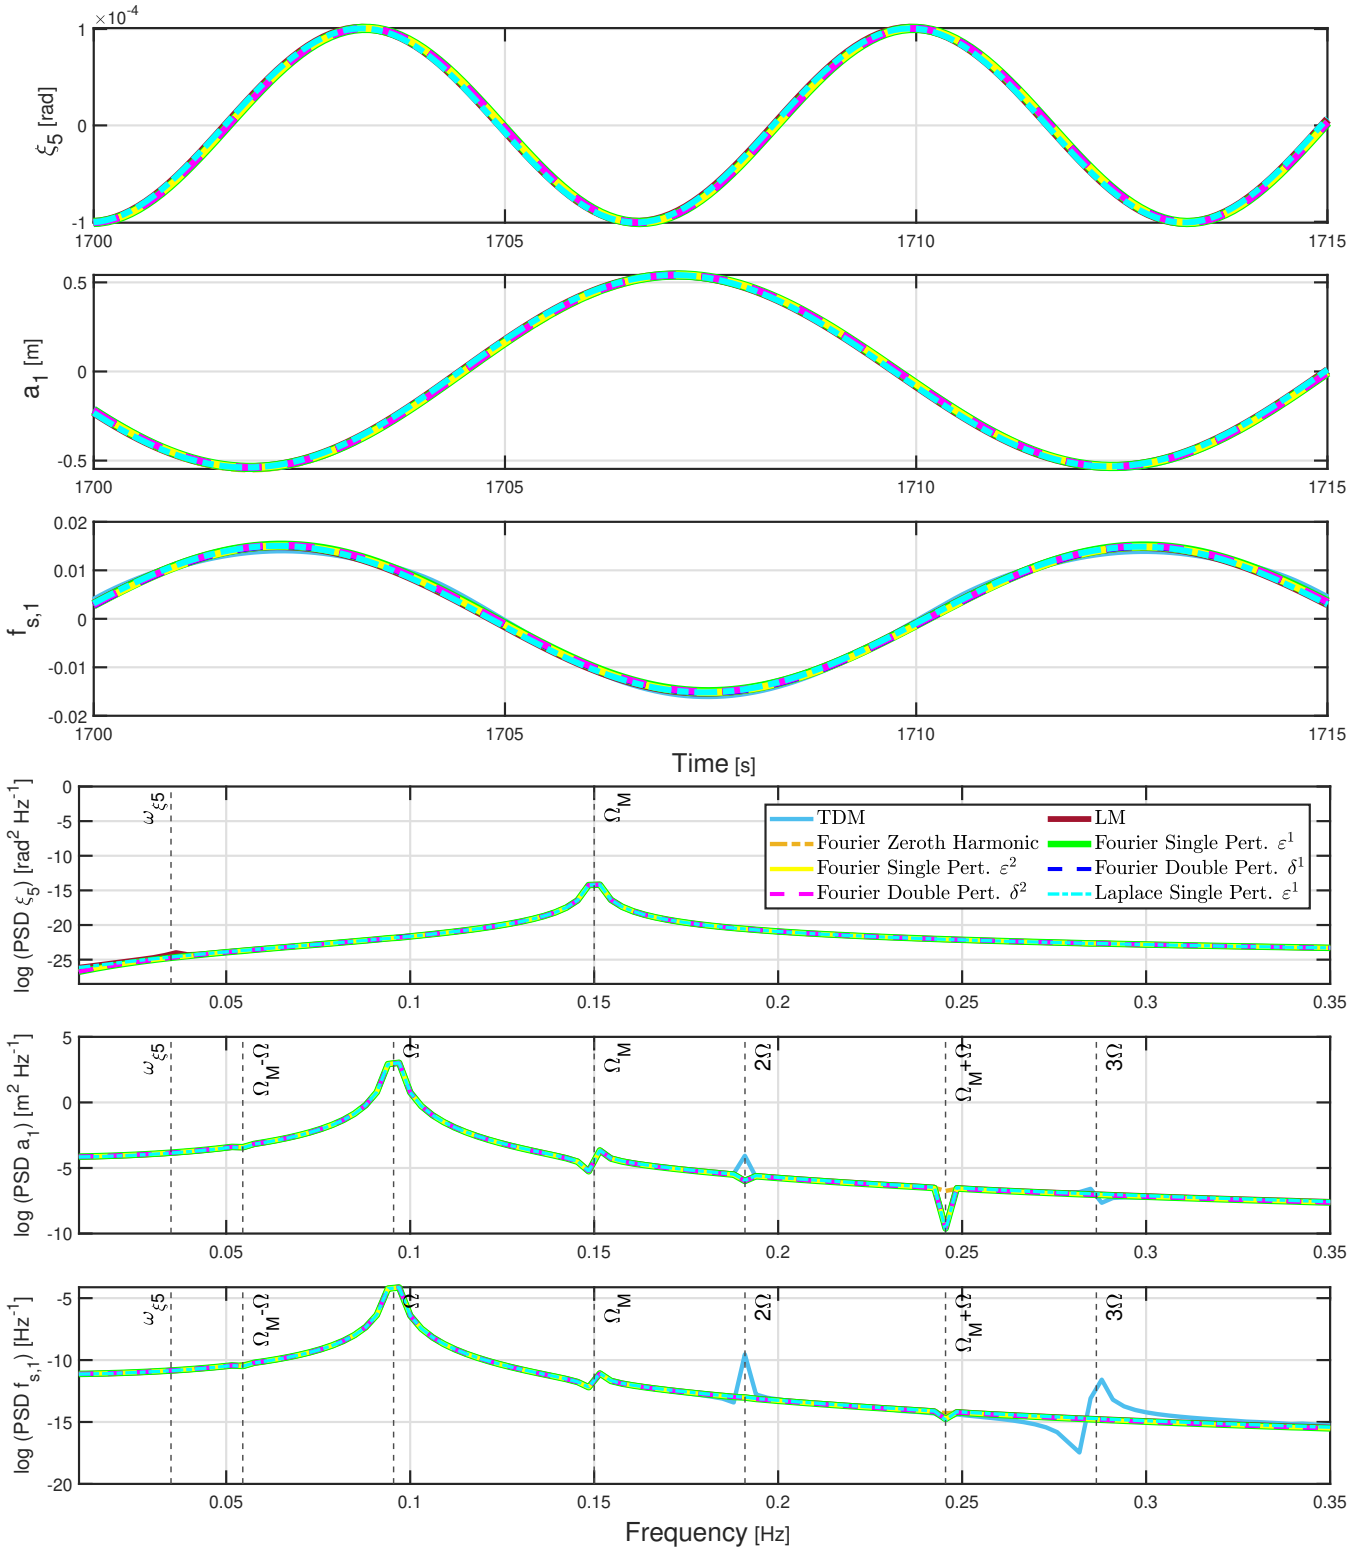

**Figure 4.** Time series and PSD plots for load case  $B$  with the operational point of  $V_0 = 8 \text{ ms}^{-1}$  and  $\Omega = 0.6 \text{ rads}^{-1}$ , and for a simulation duration of  $T_{\text{sim}} = 3071.2 \text{ s}$ .

### 6.3 Load case $C$ : turbulent inflow and harmonic floater forcing

650 The load case  $C$ , like all stochastic load cases ( $C-E$ ), considers a single seed realization (with a TI 5.77%) used to present the time series, frequency response, and logarithmic exceedance probability plots. However, for the Standard Deviation Relative Error analysis discussed later in Section 6.7, various simulations with different TIs were carried out (Fig. C1). As for the simulation duration, it remains the same for all load cases ( $A-E$ ), with  $T_{\text{sim}} = 3071.2$  s.

Concerning the load case  $C$  results displayed in Fig. 5 that are generated for a spatially coherent turbulent inflow velocity, the time series indicate that there is no clear periodic response for the blade variables channels,  $a_1$  and  $f_{s,1}$ . Overall, the PSD plots for this stochastic load case illustrate how broadbanded the response spectra are due to the effects of turbulence.

655 For the  $f_{s,1}$  channel, the time series show a small offset between the TDM and the other results, while no visible difference is observed between the LM, the Fourier-based fast response methods, and the Laplace-based method.

In the floater pitch angular motion channel, the natural frequency is recognizable at  $\omega_{\xi_5}$  because it is excited by the stochastic load which dominates the response. Further, the energy at the floater pitch excitation frequency  $\Omega_M$  is visible to a minor degree for the floater pitch motion channel.

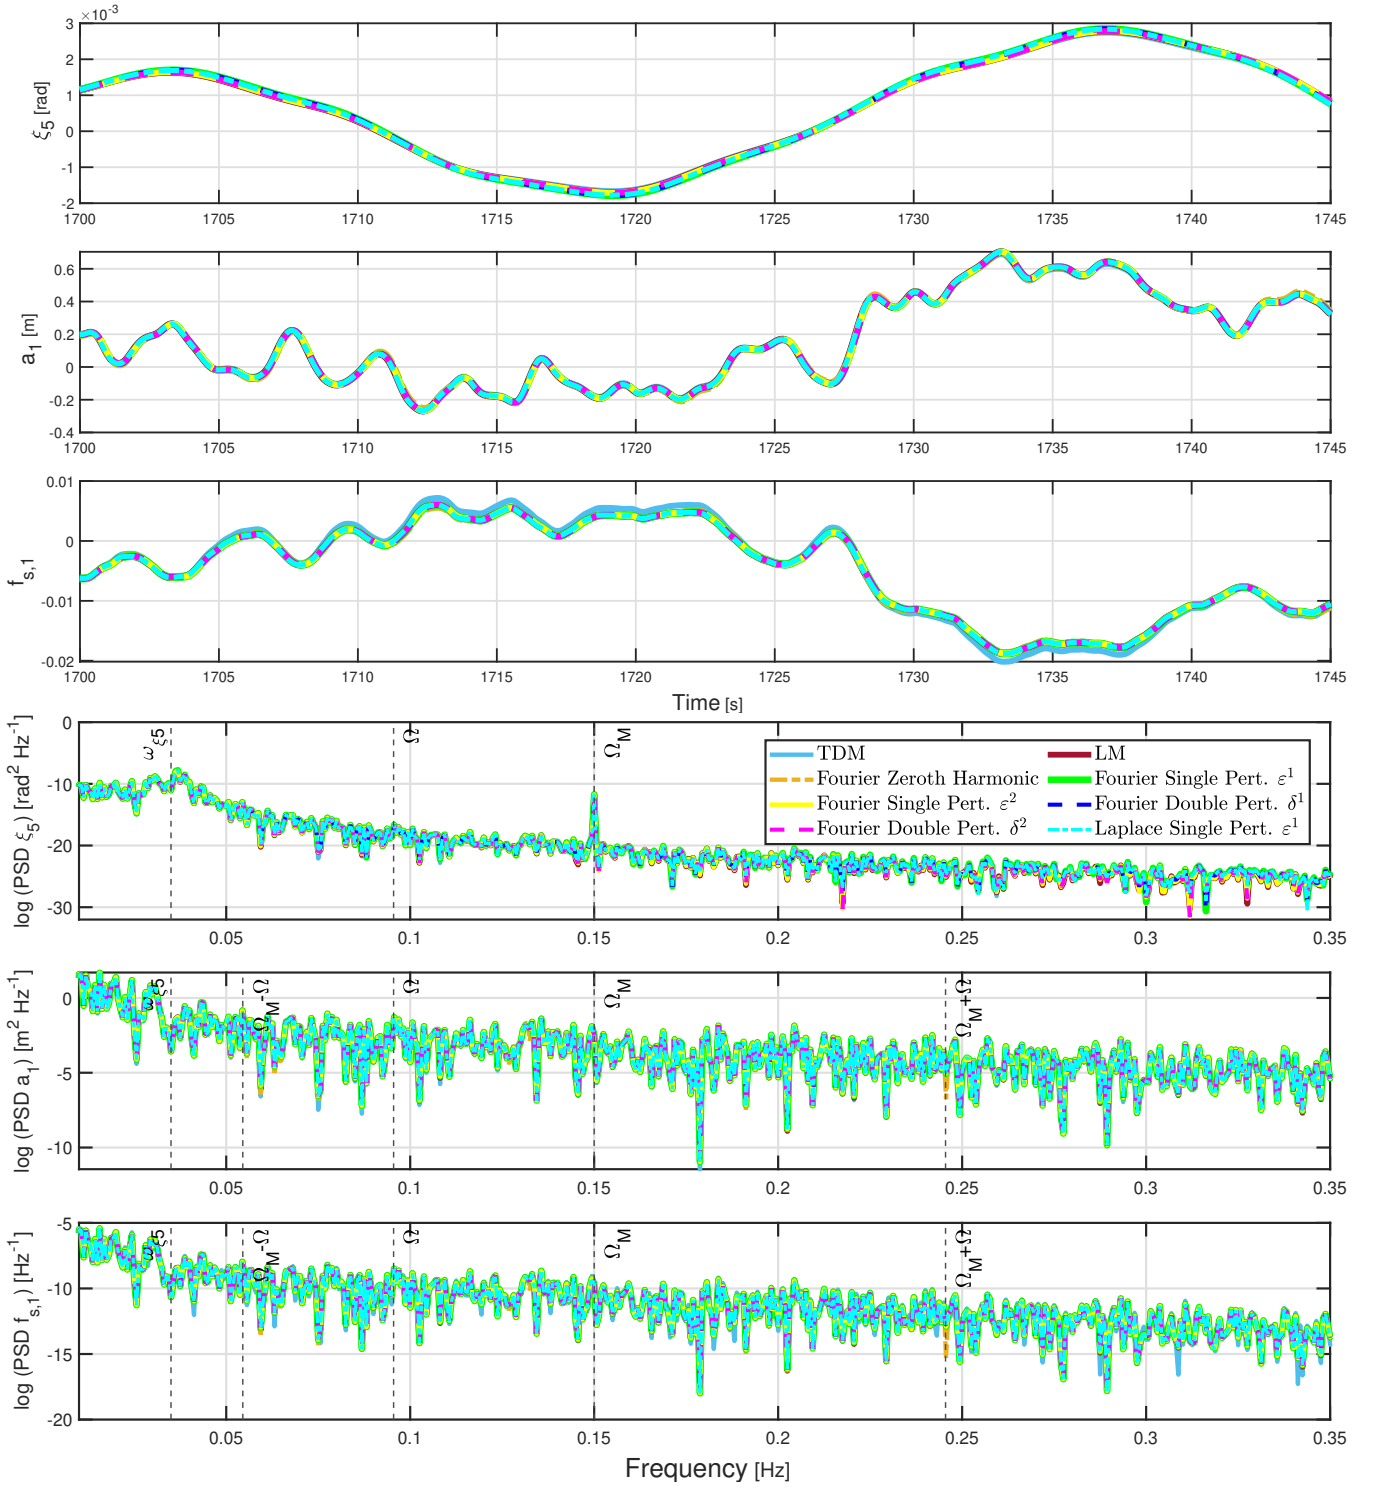

**Figure 5.** Time series and PSD plots for load case  $C$  with the operational point of  $V_0 = 8 \text{ ms}^{-1}$  and  $\Omega = 0.6 \text{ rads}^{-1}$ , and for a simulation duration of  $T_{\text{sim}} = 3071.2 \text{ s}$ .

To analyze the accuracy of the various methods in detail, exceedance probability plots are presented in Fig. 6. In this  
660 paper, for exceedance probability plots, ~~we evaluate the absolute relative difference at the maximum positive peaks that have~~  
the absolute value of the relative difference is evaluated at positive peaks corresponding to the same exceedance probability  
with respect to a reference ~~value, being generally quantity, typically~~ the LM value. The deviations are generally small between  
between the TDM and LM. The deviations error are obtained by a comparison of two peaks of the same exceedance probability  
value. The largest ones occur for the  $f_{s,1}$  channel for the largest peaks with a difference going up to 14 %, whereas it goes up  
665 to 5 % for the  $a_1$  channel. The mismatch of higher signal peaks for the fast response and Laplace-based results with the LM  
occurs at very low exceedance probabilities. This entails that overall results have a good agreement with the LM and the error  
is small. The largest deviation from the LM is observed in the  $a_1$  and  $f_{s,1}$  channels for the fast response single perturbation  
method of accuracy going up to  $O(\varepsilon^2)$ , resulting in an error reaching 2.8 % for the largest peaks in both channels.

Exceedance probability results are sensitive to small deviations from the LM reference. Consequently, they show that the  
670 double perturbation method provides slightly more accurate results than the single perturbation. In addition, for the present load  
case, an increased harmonic order of consideration (up to perturbation  $\varepsilon^2$  or  $\delta^2$ ) does not indicate a considerable improvement  
in accuracy.

Deviations from the LM also occur for the Laplace method in particular for the  $\xi_5$  channel result.

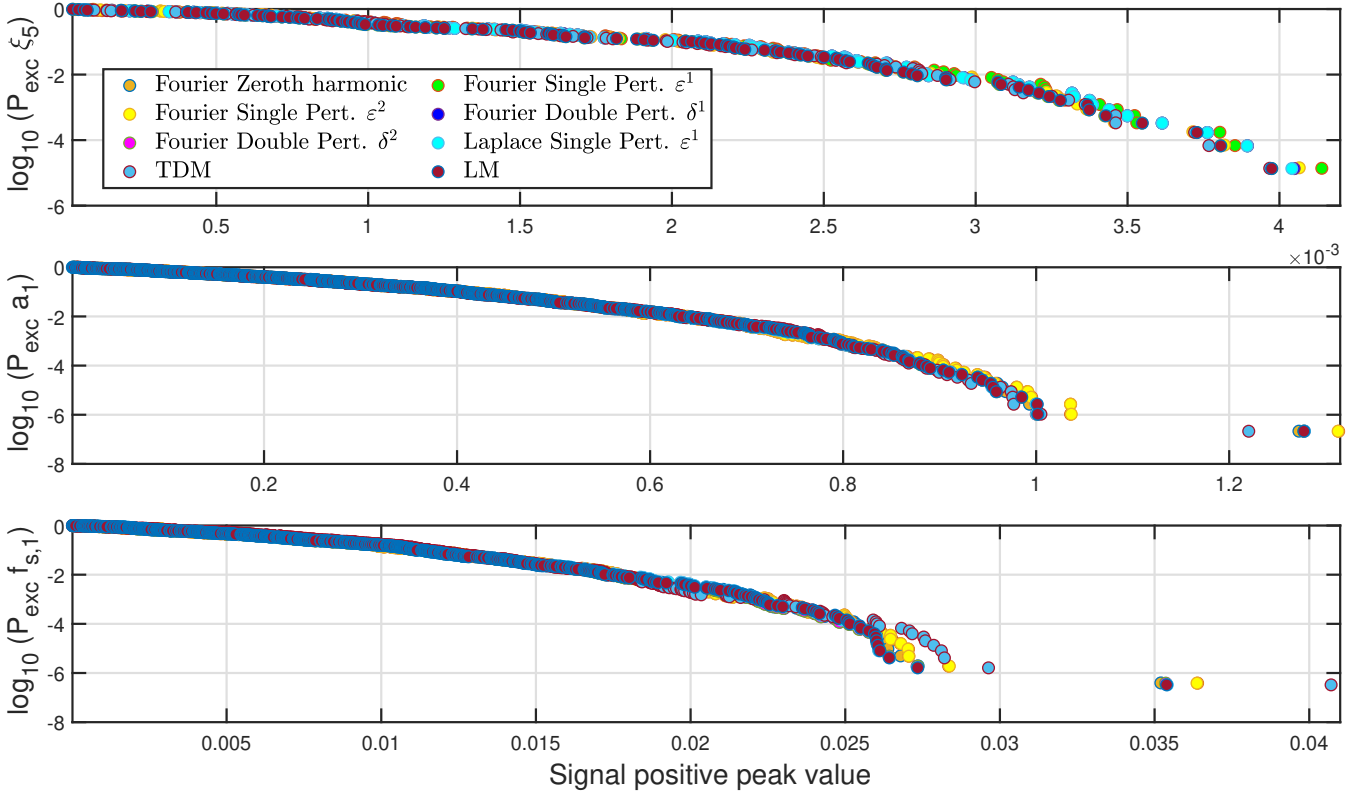

**Figure 6.** Logarithmic exceedance probability plots for load case  $C$  evaluated for all the fast response methods, the time-domain model (TDM), and the linear model (LM). The operational point is  $V_0 = 8 \text{ ms}^{-1}$  and  $\Omega = 0.6 \text{ rad s}^{-1}$  and the simulation duration is of  $T_{\text{sim}} = 3071.2 \text{ s}$ .

#### 6.4 Load case $D$ : constant inflow and stochastic floater forcing

675 ~~For~~ The results for load case  $D$  results, shown in Fig. 7, ~~only~~ are based on a single seed realization in which the floater pitch moment is stochastic. Also, for the Standard Deviation Relative Error analysis of load case  $D$ , that is presented later in Section 6.7, multiple runs with different stochastic seeds for the hydrodynamic moment were performed (Fig. C2).

Generally, the PSD plots for this load case reveal a broadbanded response, as it is influenced by the stochastic nature of the floater pitch moment.

680 As observed in both the time series and PSD plots, the influence of the periodic system matrix at frequency  $\Omega$  makes the zeroth harmonic alone insufficient to accurately represent the blade DOFs responses compared to methods that include higher harmonic effects. That being said, the comparison between the LM and the fast response and Laplace-based methods shows very good agreement when a higher-order harmonic accuracy is considered. There is also a small offset of the TDM response with the rest of results visible in the  $f_{s,1}$  channel.

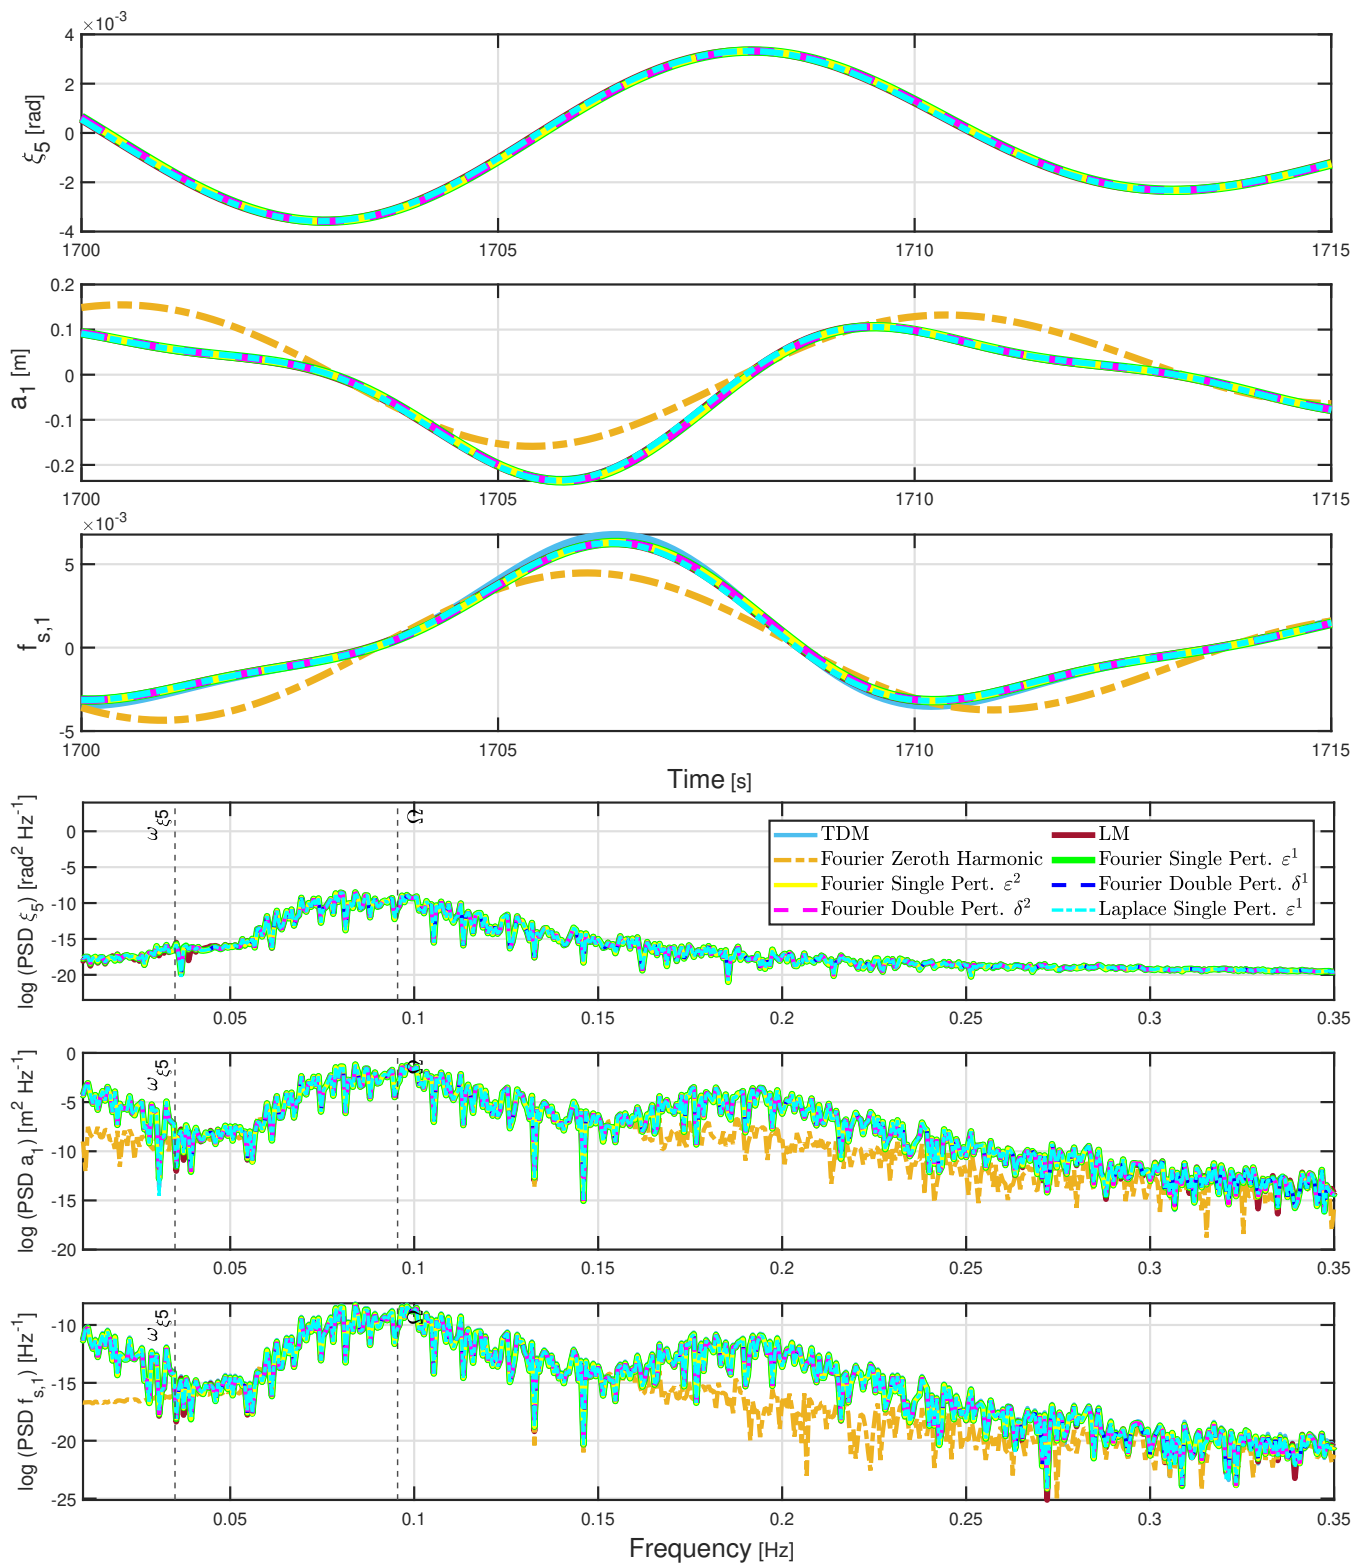

**Figure 7.** Time series and PSD plots for load case  $D$  with the operational point of  $V_0 = 8 \text{ m s}^{-1}$  and  $\Omega = 0.6 \text{ rad s}^{-1}$  and for a simulation duration of  $T_{\text{sim}} = 3071.2 \text{ s}$ .

685 In Fig. 8, as consistent with the time series and PSD plots analyses, the exceedance probability results for load case  $D$  show some deviations exhibit some discrepancies between the LM and TDM results, with the predictions. The largest deviation, reaching an error of 8%, occurring is observed in the  $f_{s,1}$  channel. The On the other hand, the zeroth harmonic results accurately approximate the floater pitch response but not the blade responses. Furthermore, the results that include contributions from at least one higher harmonic (fast response methods and the Laplace method) match the LM results perfectly for all channels.

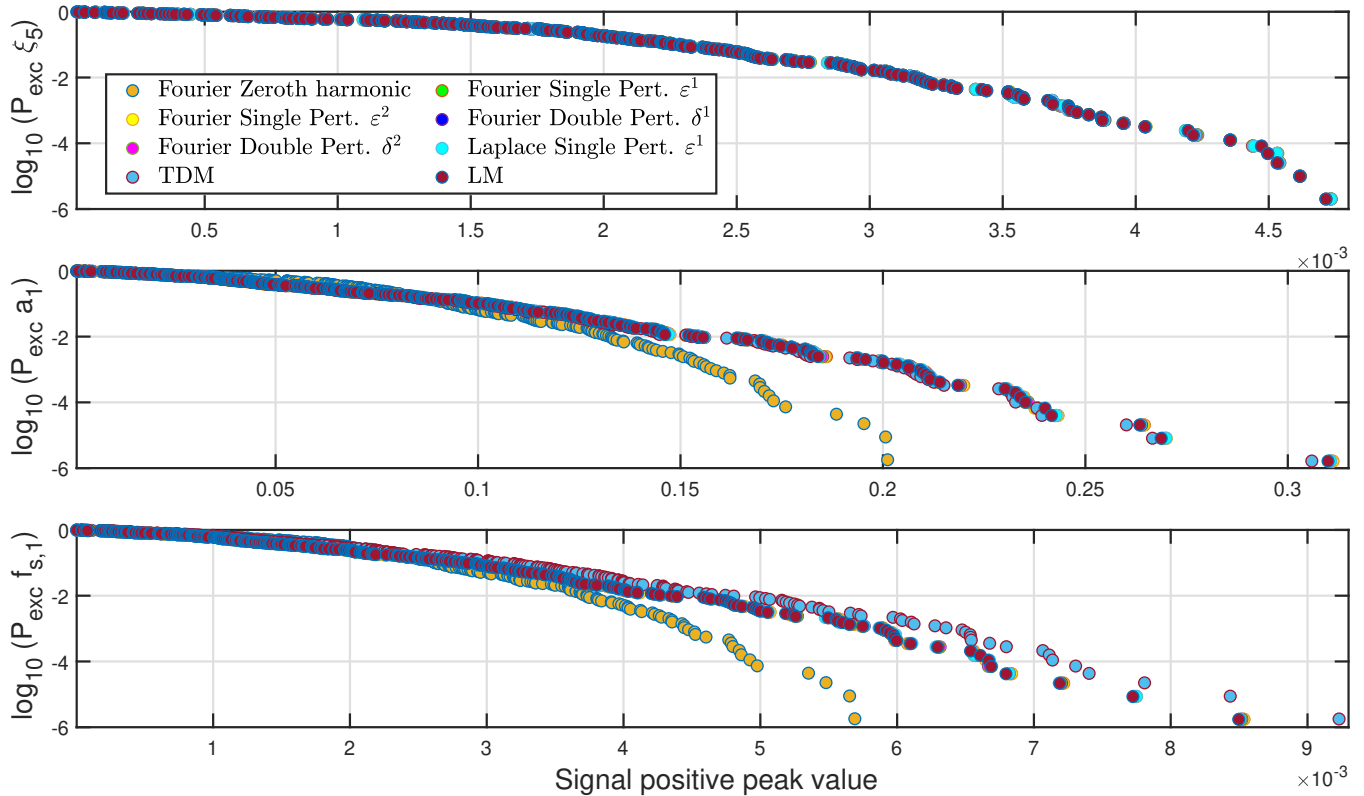

**Figure 8.** Logarithmic exceedance probability plots for load case  $D$  evaluated for all the fast response methods, the time-domain model (TDM), and the linear model (LM). The operational point is  $V_0 = 8 \text{ ms}^{-1}$  and  $\Omega = 0.6 \text{ rads}^{-1}$ , and the simulation duration is of  $T_{sim} = 3071.2 \text{ s}$ .

## 690 6.5 Load case $E$ : shear, turbulent inflow and stochastic floater forcing

Finally, for the load case  $E$ , where both the inflow velocity and the floater pitch moment are stochastic, the results are showcased in Fig. 9. PSD plots for the stochastic load case  $E$  reveal how broad-frequency the response is due to the influence of turbulent inflow.

The peak for the rotational speed frequency,  $\Omega$ , is noticeable in the floater pitch  $\xi_5$  PSD channel but it is most apparent in the blade DOFs channels. Yet, it was also present on PSD plots for case  $D$  but that peak was highly damped in comparison.

695

Generally, the results for the Laplace and fast response methods that are above the zeroth harmonic in accuracy match well with the LM.

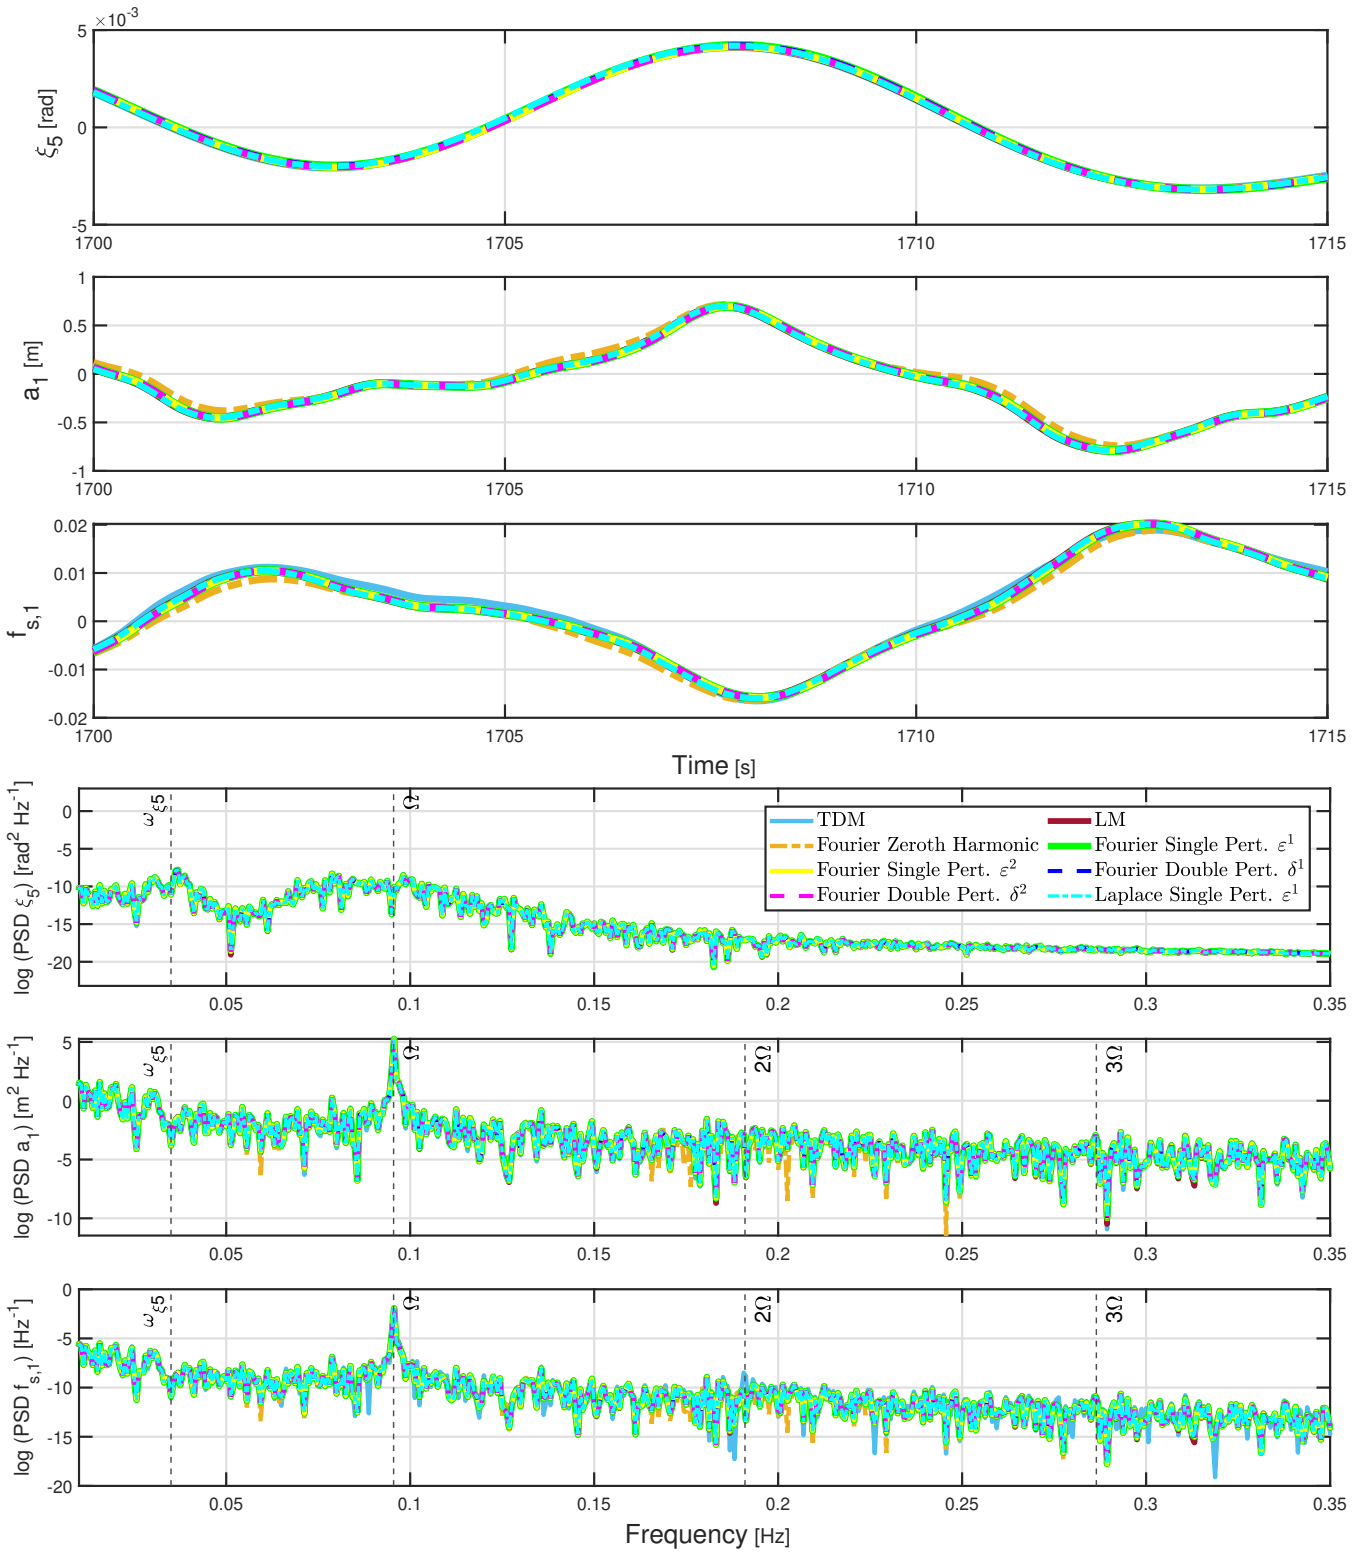

**Figure 9.** Time series and PSD plots for load case  $E$  with the operational point of  $V_0 = 8 \text{ ms}^{-1}$  and  $\Omega = 0.6 \text{ rads}^{-1}$ , and for a simulation duration of  $T_{\text{sim}} = 3071.2 \text{ s}$ .

The load case  $E$  exceedance probability results are shown in Fig. 10. They overlap each other for the most part, except for the TDM results in the blade DOFs channels  $a_1$  and  $f_{s,1}$ . Just like for the time series, the exceedance probability results for the methods having an accuracy that is above the zeroth harmonic methods, agree well with the LM results. In that respect, the largest errors occurring in the  $a_1$  and  $f_{s,1}$  channels under load case  $E$  reach a maximum of approximately 1.3%. There are additional deviations of the Laplace method from the LM results that appear in the  $\xi_5$  channel and which are of 1.6 % error in magnitude.

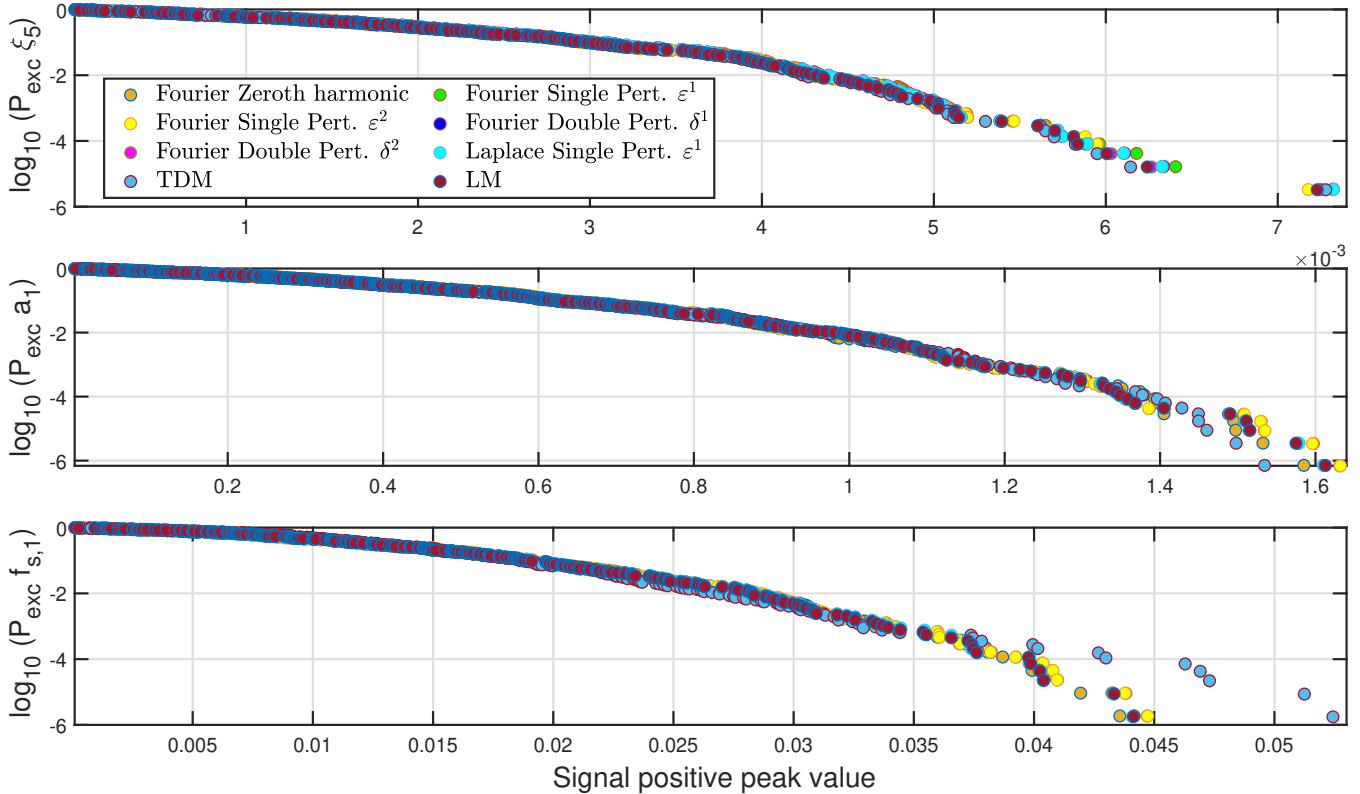

**Figure 10.** Logarithmic exceedance probability plots for load case  $E$  evaluated for all the fast response methods, the time-domain model (TDM), and the linear model (LM). The operational point is  $V_0 = 8 \text{ ms}^{-1}$  and  $\Omega = 0.6 \text{ rads}^{-1}$ , and the simulation duration is of  $T_{sim} = 3071.2 \text{ s}$ .

## 6.6 Overview

Overall, a noticeable discrepancy in results occurs between the TDM and LM. That is to be expected due to the non-linear effects that the TDM takes into account with the time variability of aerodynamic variables. However, for most load cases, the results of the perturbation methods matched well with the LM reference. The deviations from the LM are not always perceptible in time series excerpts and PSD plots. They become noticeable in exceedance probability plots with an increasing signal peak value and a reduced probability.

710 An important mismatch is observed between the zeroth harmonic response and responses of a higher harmonic order con-  
sideration. ~~This occurs when the forcing contains a high periodicity with  $\Omega$  for a specific load case. This inaccuracy~~ The  
inaccuracy of the zeroth harmonic response is visible in time series, PSD plots, and particularly in exceedance probability plots  
where deviations from the LM reference are most apparent. This occurs when the forcing contains a high periodicity with  $\Omega$   
for a specific load case. The high periodicity of the load refers to its frequency spectrum being highly influenced by the integer  
715 harmonics of the rotational speed  $\Omega$ , resulting in pronounced spectral peaks at those harmonic frequencies.

The zero-order method shows large deviations especially in load cases *A* and *D* (i.e. cases with constant wind). As discussed  
earlier, turbulent wind, particularly at higher turbulence intensity (TI), enhances the dominance of the zeroth-order response  
through its contribution to the state-space forcing vector  $F_{B,l}(t)$ . In contrast, under constant wind inflow, the zeroth-order  
response is less dominant because  $F_{B,l}(t)$  is not influenced by variations in the inflow velocity  $\Delta V_{0,l}$  for blade index  $l$ . For  
720 these load cases, the resulting large relative errors are reflected in both the blade response and the dynamic stall degrees of  
freedom, as their excitation relies primarily on floater pitch motion due to the constant wind. This leaves the dynamic forcing of  
these blade DOFs to be caused through the floater pitch motion. Within the present floating wind turbine model, this coupling  
involves the mass matrix, which is assumed constant at zeroth order, thereby limiting the representation of periodic effects.

To provide an overview of the accuracy of the results, the exceedance probability error is compared in terms of the signal  
725 positive peak value relative to the LM at the level of  $P_{\text{exc}} = 10^{-2}$  and at the highest peak level, labeled  $P_{\text{exc}} = 10^{-x}$ . If the  
relative error with respect to the LM is higher at another exceedance probability level than at the highest peak, which can  
sometimes occur (e.g. load case *E*), then the error is evaluated at that level. Besides, the relative error can be evaluated for  
the stochastic load cases *C*, *D*, and *E*, across the different response channels  $\xi_5$ ,  $a_1$ , and  $f_{s,1}$ , and various response (Resp.)  
calculation methods. The response calculation methods include the Fourier single perturbation method with accuracy  $\varepsilon^2$  (S2),  
730 the double perturbation method with accuracy  $\delta^2$  (D2), and the Laplace single perturbation method with accuracy  $\varepsilon^1$  (L1). The  
relative error results for these three methods are presented in Table 2.

**Table 2.** Exceedance probability relative error in percentage (%) for signal positive peak value with respect to LM reference for the opera-  
tional point of  $V_0 = 8 \text{ m s}^{-1}$ ,  $\Omega = 0.6 \text{ rad s}^{-1}$

| Load Case | Resp. | $P_{\text{exc}} = 10^{-2}$ |       |           | $P_{\text{exc}} = 10^{-x}$ |              |              |
|-----------|-------|----------------------------|-------|-----------|----------------------------|--------------|--------------|
|           |       | $\xi_5$                    | $a_1$ | $f_{s,1}$ | $\xi_{5,x}$                | $a_{1,x}$    | $f_{s,1,x}$  |
| C         | S2    | 2.239                      | 1.546 | 0.868     | 2.282, 4.844               | 2.778, 6.670 | 2.777, 6.413 |
|           | D2    | 0.127                      | 0.091 | 0.118     | 0.002, 4.868               | 0.006, 6.670 | 0.110, 6.420 |
|           | L1    | 1.750                      | 0.146 | 0.846     | 1.670, 4.868               | 0.046, 6.666 | 0.063, 6.480 |
| D         | S2    | 0.129                      | 0.325 | 0.397     | 0.384, 5.694               | 0.361, 5.790 | 0.434, 5.759 |
|           | D2    | 0.088                      | 0.563 | 0.024     | 0.412, 5.694               | 0.108, 5.790 | 0.210, 5.759 |
|           | L1    | 0.116                      | 0.106 | 0.148     | 0.379, 5.694               | 0.198, 5.781 | 0.096, 5.753 |
| E         | S2    | 0.588                      | 0.479 | 0.725     | 1.599, 4.378               | 1.334, 5.468 | 1.338, 5.730 |
|           | D2    | 0.084                      | 0.122 | 0.206     | 0.434, 4.386               | 0.100, 5.462 | 0.085, 5.727 |
|           | L1    | 0.224                      | 0.017 | 0.266     | 1.607, 4.374               | 0.232, 5.451 | 0.109, 5.756 |

To reduce the size of Table 2, only the higher-order results are presented here, as these correspond to the highest accuracy for each perturbation-based method. Even though the zeroth-order results appear to perform well for the stochastic load cases C (Figs. 5 and 6) and E (Figs. 9 and 10), they are not shown here. According to the relative error results in Table 2, the D2 method generally provides the highest response precision, while the L1 method occasionally outperforms it depending on the load case and the exceedance probability level considered. The overall accuracy of these two methods is excellent, with the highest observed relative error not exceeding 0.56%. In contrast, the S2 method consistently yields the lowest accuracy across most load cases and exceedance probability levels, with relative errors systematically higher than those of the D2 and L1 methods. This discrepancy is particularly notable in the estimation of the  $\xi_5$  channel response, where the S2 method often underperforms compared to its counterparts. The largest error for the S2 method is 2.78%, which is still fairly accurate.

### 6.7 Standard Deviation Relative Error

The accuracy of the fast response methods can be alternatively quantified through the Standard Deviation Relative Error (SDRE) which is denoted  $\sigma_{SDRE}(\tilde{q}_{i,method}(t))$  and evaluated for each  $i^{th}$  response channel's non-transient data samples. It is calculated through the standard deviation ( $\sigma(\cdot)$ ) of the data samples' residual with respect to the LM reference values  $\tilde{q}_{i,LM}(t)$ , and then normalized with respect to the standard deviation of the LM values,

$$\sigma_{SDRE}(\tilde{q}_{i,method}(t)) = \frac{\sigma(\tilde{q}_{i,method}(t) - \tilde{q}_{i,LM}(t))}{\sigma(\tilde{q}_{i,LM}(t))}. \quad (39)$$

Evidently, a higher SDRE value translates to a lower accuracy. Compared to the analysis of exceedance probability plots in Figs. 6, 8 and 10, this error measure concerns a direct deterministic comparison of the response time series. The SDRE accuracy values are visualized for the fast response and Laplace methods in comparison to the LM benchmark in Fig. 11.

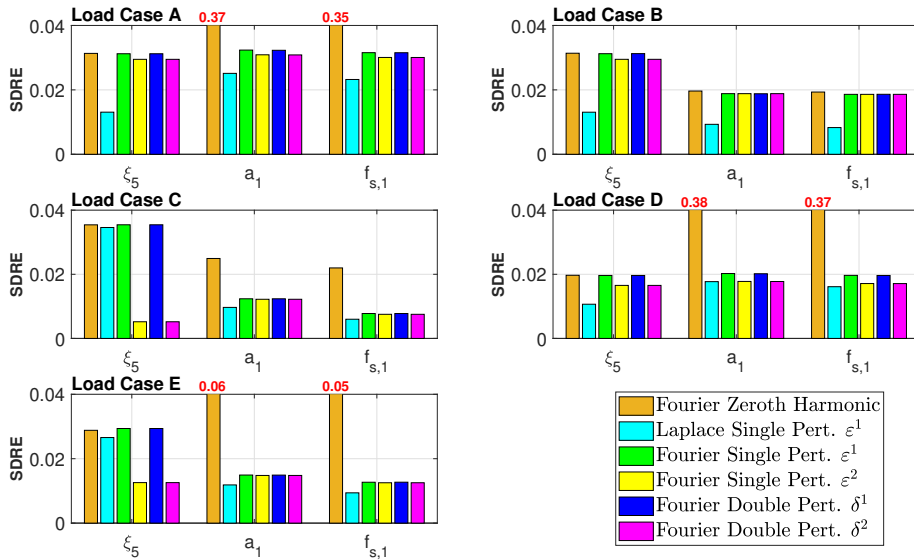

**Figure 11.** Standard Deviation Relative Error (SDRE) for varying load cases and response channels. The analyzed fast response methods are the Fourier zeroth harmonic, as well as the double and single perturbation (Pert.) methods.

750 Results in Fig. 11 confirm roughly the same observations as deduced from exceedance probability plots and time series. For the single and double perturbation methods, the accuracy was first tested for a precision up to first-order harmonic ( $\varepsilon^1$  and  $\delta^1$  perturbation). Then the response accuracy was increased up to second second-order harmonic ( $\varepsilon^2$  and  $\delta^2$  perturbation) which did improve it considerably for the  $\xi_5$  channel in load cases  $C$  and  $E$ , whereas it did not affect it significantly for other load cases. This supports the choice of settling for a maximal second-order harmonic accuracy being tested for both the single and  
 755 double perturbation methods.

~~While the zeroth harmonic method can give error levels~~ The zeroth harmonic method can result in error levels of up to 38% , the for certain load cases, as demonstrated by the corresponding time series, PSD, and logarithmic exceedance probability plots. On the other hand, the error levels of both first-order methods ~~(, including single and double perturbation) is~~ , remain below 3.5% ~~for across~~ all tests. For load case  $E$ , the difference in SDRE values between the zeroth-order and higher-order  
 760 methods is somewhat larger than expected, based on the time series, PSD, and logarithmic exceedance probability plots (Figs. 9 and 10). This occurs even though the SDRE values for the zeroth-order channels remain below 6%. The discrepancy can be attributed to the slight deviations of the zeroth-order responses from the other responses in the blade channels  $a_1$  and  $f_{s,1}$ , as observed in the time series and PSD plots shown in Fig. 9. In addition, for some of the tests, the second-order methods improve the accuracy relative to the first-order methods. Thus, e.g. in the stochastic load cases  $C$ ,  $D$  and  $E$ , they give error levels below  
 765 2%. As for the Laplace single perturbation method of  $\varepsilon^1$  perturbation order, its accuracy fluctuates more than for fast responses but is below 3.5% for all load cases.

Moreover, there are some important numerical attributes of the system matrices worth noting that explain why part of the results are not always affected by the load case itself in this study.

770 Firstly, the time-varying components of the system matrix  $\tilde{\mathbf{A}}_L$  can be approximated by only the first-order harmonic contribution  $\tilde{\mathbf{A}}_{L,1}$  meaning that other higher-order harmonics, including  $\tilde{\mathbf{A}}_{L,2}$ , are negligible, i.e.  $\tilde{\mathbf{A}}_L \approx \tilde{\mathbf{A}}_{L,1}$  and  $\tilde{\mathbf{A}}_{L,2} \approx \mathbf{0}$ . Under this observation, the single and double perturbations numerical schemes produce identical accuracy results in terms of SDRE value. This implication is discernible through a comparison of the single and double perturbation Eqs. (34) and (30) respectively. These equations are equal if we neglect the term  $\tilde{\mathbf{A}}_{L,2}\tilde{\mathbf{q}}_0 \approx \mathbf{0}$  in Eq. (30). That explains why for most load cases the error levels do not decrease significantly from first- to second-order harmonic response and that the single and double perturbation  
 775 methods show broadly identical accuracy.

Secondly, the off-diagonal terms in Eqs. (34) and (30) are forcing input contributions that multiply the transfer function  $\mathbf{H}(\omega)$ . When solving the first-order harmonic  $\tilde{\mathbf{q}}_1$ , the forcing contribution is only determined by  $\tilde{\mathbf{A}}_L\tilde{\mathbf{q}}_0$  or  $\tilde{\mathbf{A}}_{L,1}\tilde{\mathbf{q}}_0$  depending on the method (single or double perturbation). For the  $\xi_5$  channel in all load cases, this numerical forcing term happens to produce almost a null first harmonic response  $\tilde{\mathbf{q}}_1 \approx \mathbf{0}$ . In this scenario, the zeroth harmonic response,  $\tilde{\mathbf{q}}_0$ , magnitude (Euclidean  
 780 norm) is much greater than the corresponding DOFs coefficients in  $\tilde{\mathbf{A}}_{L,1}$  (Frobenius norm). This indicates that the coupling between these two terms of varying harmonic is indeed negligible, which is why there is no added accuracy in SDRE when adding the first-order harmonic contribution to the zeroth order for the  $\xi_5$  channel.

One of the major distinctions between load cases accuracy is observable for the floater pitch channel  $\xi_5$  when the load case considers the stochastic forcing from a turbulent inflow or a stochastic hydrodynamic moment. According to the corresponding

785 PSDs for load cases  $C$ ,  $D$  and  $E$  in Figs. 5, 7 and 9, there is a peak at the rotational speed  $\Omega$  ( $1P$ ). The peak at  $1P$  frequency occurs within the power spectra in the  $\xi_5$  channel for load case  $C$ , and in the blade DOFs channels,  $a_1$  and  $f_{s,1}$ , for load cases  $D$  and  $E$  particularly. For these particular scenarios, the  $\Omega$  frequency of excitation signifies that the system is influenced by the corresponding first-order harmonic response  $\tilde{q}_1$ . Given that  $\tilde{q}_1$  is non negligible for load cases  $C$ ,  $D$  and  $E$ , the evaluation of the forcing term  $\tilde{\mathbf{A}}_{L,1}\tilde{q}_1$  for the double perturbation method and  $\tilde{\mathbf{A}}_L\tilde{q}_1$  for the single perturbation method, improves the model  
790 accuracy through the contribution of a second-order harmonic  $\tilde{q}_2$  in the response  $\mathbf{q}$ . This improvement in accuracy translates to a decrease in SDRE for the  $\xi_5$  channels.

The SDRE has also been evaluated individually for load case  $C$ , considering variations in the stochastic inflow turbulence intensity (TI), and for load case  $D$ , by repeating simulation runs with different seeds for the stochastic hydrodynamic moment. The findings for the variation of TI in load case  $C$  and the different runs in load case  $D$  are illustrated in Appendices C1 and  
795 C2, respectively. According to the corresponding two Figs. C1 and C2, there is visibly a stronger variation of SDRE values for the load case  $C$  with changes in the inflow TI, compared to the load case  $D$  with different simulation runs and different inputs of stochastic hydrodynamic moments. For load case  $D$ , changes in the stochastic seed have minimal impact on the bar plots, while TI variations for load case  $C$  have a slightly more pronounced effect on the SDRE results.

Starting from the analysis of the SDRE for all load cases  $A$  to  $E$  in Fig. 11, it is clear that the variability in the SDRE values  
800 is not due to random noise but reflects a method-dependent sensitivity to different stochastic excitations. To rigorously assess these differences for all response methods, non-parametric statistical tests were applied. They are more suitable than traditional parametric approaches, such as the ~~analysis of variance~~ Analysis of Variance (ANOVA) or t-tests which presume normality and equal variances of responses. Non-parametric tests were performed due to the non-Gaussian and nonlinear nature of the system responses under turbulent and stochastic hydrodynamic moment inputs. In particular, the Kruskal-Wallis test was used for  
805 independent sample comparisons in order to treat responses from each method as unrelated, while the Friedman test accounted for repeated response measures when the same system was analyzed using different estimation methods. The Kruskal-Wallis statistical analysis produced  $p$ -values (probability values) well below the 0.05 threshold for load cases  $C$  (turbulent inflow) and  $D$  (stochastic hydrodynamic loading), and for all three output channels  $\xi_5$ ,  $a_1$ , and  $f_{s,1}$ . This indicates statistically significant differences between the estimation methods. When all load cases ( $A$ – $E$ ) ~~are~~ were considered, the  $p$ -values increased slightly  
810 above 0.05, suggesting that the influence of the method becomes more diffuse across a broader range of conditions. This observation is logical, as the influence of the method on the SDRE value is more pronounced across varying load cases  $A$  to  $E$  than across the variation of turbulence intensity (TI) within load case  $C$ . In that vein, the lowest  $p$ -values are observed for load case  $D$ , as the variation between simulation runs has less impact on the SDRE compared to the more substantial changes introduced in the other load case groupings. Friedman test results revealed that across all load conditions, including  
815 the combined set  $A$  to  $E$ ,  $p$ -values remained consistently below 0.01 for all three response channels. This suggested a stronger and more systematic impact of the estimation method when repeated measures from the same simulations were considered.

While both the Kruskal–Wallis and Friedman tests indicated that at least one method differs from the others, they did not reveal which ones. Therefore, post-hoc pairwise comparisons were conducted to identify the specific method pairs with statistically significant differences. Hence, the post-hoc tests revealed for each channel and load case scenario, which pairs of

820 methods differ the most from each other and which method stands out from other methods. In general, the zeroth harmonic and Laplace methods consistently showed statistically significant differences compared to other methods across most load case scenarios and response channels. This is to be expected, since the single and double perturbation methods follow a similar computational approach.

## 7 Fast response methods efficiency analysis

825 We now evaluate the execution time for various durations of the simulated time series. Such a comparison involves several choices that can significantly affect the results, including the simulation time step interval,  $dt$ , the load case being simulated, and the structure of the code. For instance, the simulation time step increment was set to  $dt = 0.0937$  s which corresponds to a Nyquist frequency of 5 Hz. The computational efficiency study was only carried out for load case  $E$ , because it is more realistic due to its stochastic nature both in wind inflow and hydrodynamic moment. It is worth noting that this section addresses  
830 the computational cost of time-domain simulations using either the TDM or LM, as well as alternative formulations in the frequency domain (Fourier-based) and the Laplace domain ( $s$ -domain). The developed fast response methods are aimed at time domain simulations, where rainflow count based fatigue analysis and exceedance probability analysis is possible. The use of the frequency domain is adopted solely to enhance numerical efficiency.

Efficient implementations were assembled for both the single and double perturbation methods by avoiding looping over time  
835 steps when possible. Looping over time steps is, however, unavoidable for the Laplace single perturbation method approach and when generating the system forcing time series  $F_{B,L}(t)$ . But the inverted structural mass matrix  $M_S^{-1}(t)$  which affects  $F_{B,L}(t)$  can be pre-computed for all time steps.

Since the new response methods require some pre-processing, CPU time can be saved by storing these results. This is outlined for the different response calculation methods in Appendix D, distinguishing between the first simulation for one  
840 random seed (Seed 1) and the subsequent simulation of a new seed (Seed 2). The hardware configuration used for computations was an HP EliteBook 840 G8 Notebook PC that features an Intel Core i7-1185G7 processor with 4 cores, 8 threads, a base clock of 2.99 GHz, with up to 4.8 GHz turbo boost. Regarding the programming implementation in MATLAB of the response calculations there was no parallelization strategy. Not using parallelization in fast response analysis programming can be advantageous because it minimizes overhead costs, decreases latency, and enhances predictability. This simpler approach also  
845 improves cache efficiency and eliminates the complexities and synchronization delays that are often encountered in parallel processing. If more cores are available, several load cases can be run independently in parallel. The CPU time of the TDM and LM for load case  $E$  is shown in Fig. 12 with a log-log scale on the  $x$ - and  $y$ -axis. Fig. 12 also presents CPU time results for a Seed 1 for the fast response methods and a Seed 2 as well for the Laplace method.

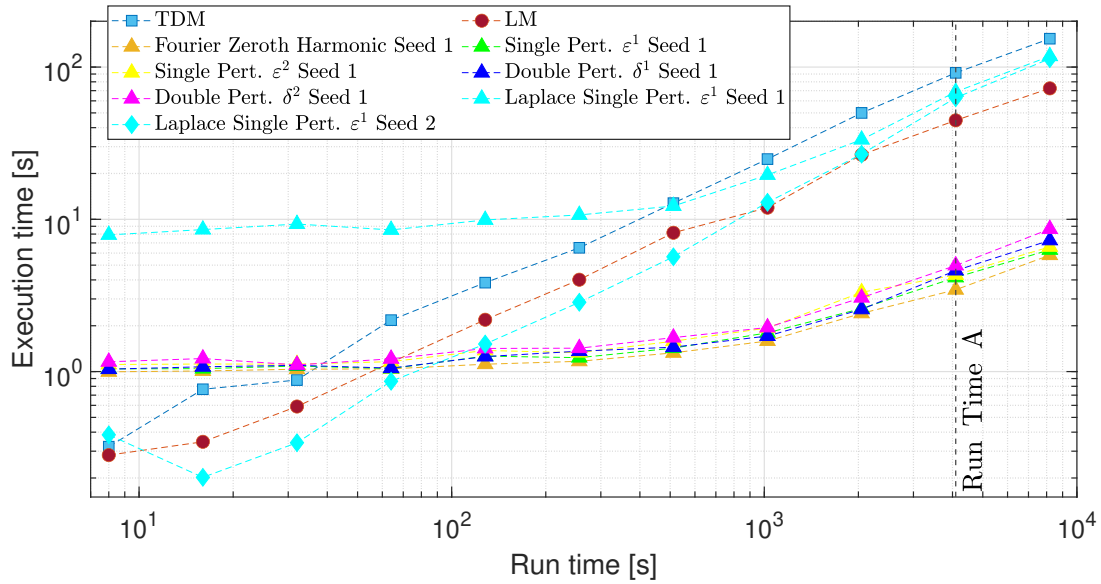

**Figure 12.** CPU execution time with respect to run time. Results are using the Seed 1 scheme for the Fourier-based fast response methods and the Seed 2 scheme as well for the Laplace method.

For the TDM, LM and the Laplace method with the Seed 2, the CPU time is proportional to time simulated with a slope that is very close to 1 in a log-log scale. In contrast, the CPU time for fast response methods has a plateau trend until reaching about 500 s of simulated time. Onward from that point, the fast response methods curves becomes straight with almost a unit slope and then the CPU time is about 10 times smaller for a first seed simulation than for the LM. Similarly, for the Laplace method with a Seed 1, the CPU time has a plateau value until reaching 1000 s run time, and then onward it has a slope close to 1.

Compared to fast response methods, that run time threshold is highest obviously for the Laplace method with Seed 1 due to its higher computational cost. Before that run time is reached, the Laplace method with a Seed 1 is more computationally expensive in execution time than any other method including the LM and TDM. Also, the Laplace method using the Seed 1 scheme is at all run times less efficient than the LM. Due to the time step looping procedure, the Laplace method is computationally vastly more costly than all other Fourier-based methods. The Laplace method using the Seed 2 scheme is slightly less efficient than the LM at higher run times, otherwise the efficiency is considerably close to the LM results and varies with the same trend. The Laplace single perturbation method is the slowest of the methods we developed, mainly because of the time-looping process used to solve the response and the preliminary symbolic operations needed. A single time-loop was tested to solve both the zeroth harmonic  $q_0$  and first harmonic  $q_1$  responses, but it was found to be slower than using two separate loops to solve each response individually. Additionally, the Fourier-based fast response methods with a Seed  $\pm 1$  are only less efficient than the LM until reaching a run time of 60 s, but after exceeding that run time threshold they become more efficient than all other methods.

The CPU time required for a Seed 2 computation using the fast response methods for load case  $E$  is shown in Fig. 13, with both the  $x$ - and  $y$ -axes displayed on a log-log scale. There is now a one to one ratio between the execution and run time because

there are no initialization costs for simulations carried out with a Seed 2. For example, with a run time of 4096 s (Run Time A on Figs. 12 and 13), the execution time for fast response methods using a single or double perturbation approach, such as the single perturbation approach with a response correction up to the second-order ( $\varepsilon^2$ ), is 1638 times faster than the real run time. It is also 36 times faster than the TDM, and 18 times faster than the LM. Since the inverted structural mass matrix can be stored and other operations can be pre-computed for a Seed 1 simulation, the execution time is further reduced by a factor 2 for a Seed 2 simulation.

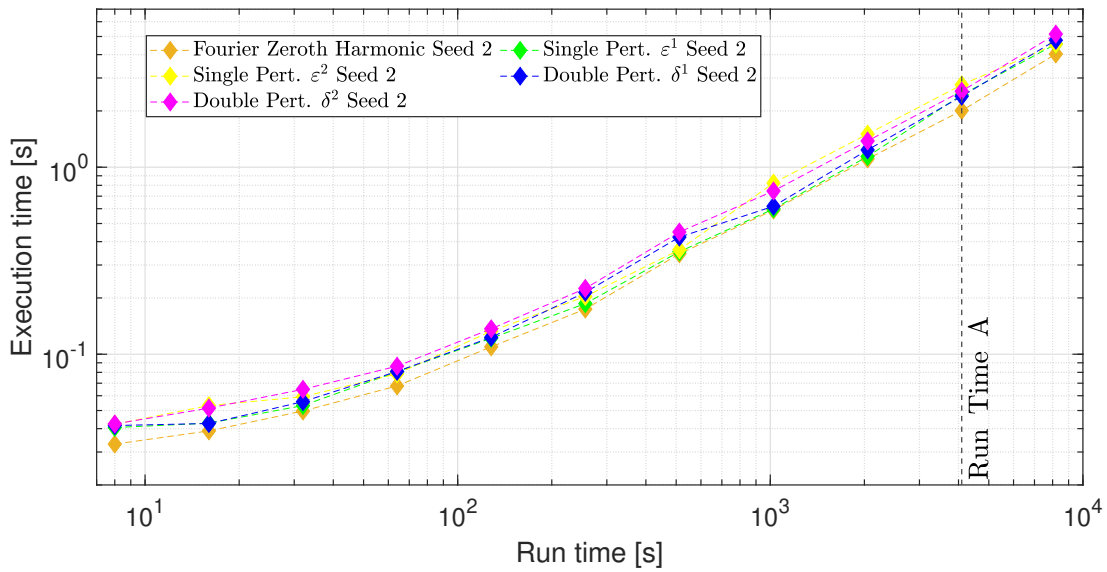

**Figure 13.** CPU execution time for Seed 2 scheme with respect to run time.

The results for Seeds 1 and 2, in Figs. 12 and 13, point out as anticipated that for both the single and double perturbation results the single harmonic computation (up to perturbation  $\varepsilon^1$  or  $\delta^1$ ) requires less execution time than up to the second harmonic (up to perturbation  $\varepsilon^2$  or  $\delta^2$ ).

In the end, the fastest fast response FFT method is the zeroth harmonic response contribution only. Due to a lack of accuracy, we find that the best alternative method is the higher-order single perturbation method with a second-order response correction. It is generally faster than the double perturbation method and provides a quasi-identical accuracy. Depending on the load case, a second-order consideration did improve the accuracy as shown in Fig. 11 and the additional computational cost for adding the second-order correction is small. As an example of accuracy evaluation, one can take into account results again for the run time of 4096 s (Run Time A). For this scenario, the first-order (up to first harmonic precision) single perturbation method predicts a result with an accuracy of 3.5% (Fig. 11) within 2.5 seconds CPU time. The second-order single perturbation method further improves that accuracy substantially for some load cases as can be seen in Fig. 11.

Among the various performance metrics analyzed, one particularly informative aspect is the overhead or initialization cost incurred by different computational schemes. The results presented in Fig. 14 illustrate the overhead costs that apply when performing simulations according to the Seed 1 computational scheme. These findings complement earlier results by highlighting more the trade-offs between accuracy and computational efficiency.

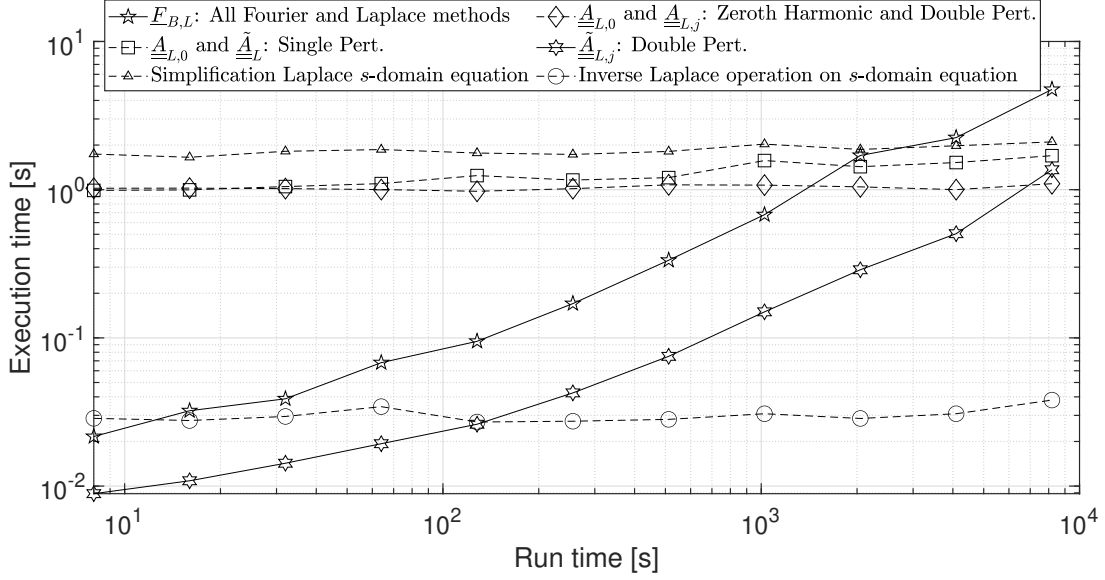

**Figure 14.** Fast response methods overhead costs in terms of execution time versus run time. The methods which require each operation are specified.

For the Laplace method, the highest initialization cost contribution comes from the symbolic simplification procedure of the Laplace  $s$ -domain Eq. (37), rather than from solving it symbolically.

Another trend that is noticeable in Fig. 14 is that both the forcing time series generation  $F_{B,L}(t)$  and the generation of the double perturbation numerical input forcing term  $\tilde{A}_{L,j}(t)$  are procedures that increase with a unit slope in execution duration with simulation run time. While the total computational cost of  $A_{L,0}$  and  $\tilde{A}_L$  in the single perturbation approach increases with the number of time steps, the growth rate is significantly lower than for the computation of  $\tilde{A}_{L,j}(t)$ , owing to the faster evaluation of the matrix  $\tilde{A}_L(t) = A_L(t) - \tilde{A}_{L,0}$  that grows in size. As expected, the cumulative computation of the matrix  $A_{L,0}$  and higher harmonic matrices  $A_{L,j}$  via Hill's decomposition remains unaffected by the difference in run time, and it is required for both the zeroth harmonic and the double perturbation methods. Lastly, the Laplace method operations also remain theoretically constant with runtime variations, however fluctuations are observed due to the stochastic nature of the runs.

We also evaluated the efficiency of our implementation by measuring the proportion of execution time spent on inverting the structural mass matrix  $M_S$  during the generation of the forcing time series  $F_{B,L}(t)$  across all time steps. Our observations showed that it reaches a maximum level of about 10 %. With that plateau value reached as the run time increases, we can consider that only a small proportion of the forcing time series generation  $F_{B,L}(t)$  (Eq. (21)) is spent on that operation.

This means that this procedure does not require optimization and can remain unchanged without the need to further reduce computational costs.

## 8 Conclusions

905 We have developed novel methods in both the frequency and Laplace domains to enable rapid analysis of the aero-elastic behavior of floating wind turbines. The proposed Fourier-based and Laplace-based perturbation techniques model the system's dynamic response with harmonic accuracy up to second order. They are intended to serve as practical tools for early-stage design and optimization, providing accurate insights into system behavior while significantly reducing the computational cost compared to traditional time-domain simulations.

910 ~~These Conventional frequency-domain approaches are unable to treat blade resolved response effects, since the azimuthal time dependence of the system matrices prevents a direct transformation to the frequency domain. Our model introduced a novel approach by explicitly considering blade-specific rotor loads in both the frequency and Laplace domains, rather than simplifying them to hub-level thrust and torque. Previous studies often represented the equations of motion in state-space form without including the effects of azimuthal blade loading, whereas our formulation incorporates these effects explicitly.~~

915 ~~The computationally efficient methods were validated that we formulated were verified~~ under various load cases, including constant inflow, sheared inflow, and stochastic waves and wind. By introduction of a harmonic ordering parameter, the original linear model with a time-varying system matrix was reformulated into a sequence of linear problems with a constant system matrix, suited for solution in the frequency domain. These new methods vary first based on the perturbation approach which can either be single or double. They can both be evaluated up to a chosen harmonic order. Hereby, higher-order harmonic corrections were shown to improve accuracy at minimal computational cost. Results demonstrated that zeroth-order approximations were insufficient in cases of strong periodicity, whereas the inclusion of higher harmonics significantly improved fidelity. Further, the Laplace single perturbation method is the slowest among the methods we ~~developed~~ implemented, primarily due to the time-looping procedure involved in solving the response and the symbolic operations required beforehand.

925 In terms of computational performance, after initialization costs, the CPU time of the fast response methods scaled proportionally to the simulation time, and achieved speedups of 8 to 10 times relative to the linear baseline. The response accuracy is adjustable via the number of harmonic corrections considered. In the end, an accuracy going up to the second-order perturbation was sufficient to obtain reliable results for all load cases that were studied. The second-order single perturbation offered the best trade-off between speed and accuracy, with an improved speed compared to the double perturbation method. With the linear model used as reference, it achieved a standard deviation relative error below 3.5% and an error below 3% with 930 largest positive peaks comparison. Conversely, for the second-order double perturbation method, the error level for the largest response peaks across all load cases and output channels was below 0.5%. Although the second-order double perturbation method generated a slightly higher accuracy, it required approximately 25% more CPU time.

The numerical methods that we elaborated are based on several assumptions and possess few limitations. While the proposed approaches assume a linear system behavior, which limits the capture of nonlinear and transient effects, such assumptions

935 remain appropriate for preliminary design analyses. The difference between the time-domain model and the linear model was quantified to assess the accuracy of the linear approximation. For few load cases, a small difference was observed between the time-domain and linear model results across the time series, PSD, and logarithmic exceedance probability plots, as the time-domain model accounts for nonlinear effects resulting from variations in aerodynamic parameters. Additionally, even though frequency-domain analyses are limited in their ability to comprehensively represent transient and nonlinear effects, to address  
940 this issue, we devised a Laplace domain method that considers transient response effects from initial conditions and relies on a first-order harmonic approximation. Consequently, it captured accurately the system's dynamic characteristics across most load cases. ~~Furthermore, the use of the Øye dynamic stall model was beneficial for computational efficiency and straightforward implementation. Although the~~

The simplicity of the model with only four degrees of freedom was chosen to provide a simple and transparent demonstration model for the fast response methods. It thus includes the coupled floater motion and blade aerodynamics with aerodynamic states. Model extensions through the inclusion of additional blade sections, dynamic inflow, tower and blade flexibility, and improved hydrodynamics are possible as future work. To enhance model accuracy, the blade modal representation could be expanded to include edgewise, torsional, and higher-order modes, as well as tower modes, which are currently neglected since the tower is modeled as rigid. Increasing the number of blade sections in the rotor load calculations would yield a more realistic aerodynamic distribution, capturing spanwise variations in turbulence (e.g. from the Mann box). Tower flexibility can be incorporated without difficulty by following the same approach as in the QuLAF model (Pegalajar-Jurado et al., 2018). With regard to floater hydrodynamics, potential improvements, which are also implemented in the QuLAF model, include frequency-dependent radiation damping and added-mass effects, as well as a more detailed representation of hydrostatic stiffness. These effects can be obtained using LPT solvers such as WAMIT, which provide frequency-domain hydrodynamic coefficients for wave excitation, radiation damping, and added mass. Moreover, the present floating wind turbine model formulation readily accommodates the inclusion of additional floater DOFs, particularly for large-volume floaters. Future work could additionally consider incorporating reactive forces from the mooring lines acting on the floater to further refine the floating wind turbine model. Also, the extension to varying rotor speed and control can be made, following the analysis in Pamfil (2025). Finally, the Øye dynamic stall model can be extended to incorporate shed vorticity effects that are  
945 as accounted for in the ~~Beddoes-Leishman~~ Beddoes-Leishman model via Theodorsen's function, but it was used here in its original form for the sake of clarity and demonstration purposes.

~~Finally, the~~ Since, however, the present results demonstrate the feasibility of the novel fast response methods, a much more beneficial future step will be to apply the methods within full aero-elastic models for floating wind turbines. The developed response calculation methods are compatible with state-of-the-art time-domain solvers such as Bladed, OpenFAST and HAWC2.  
965 Thus they provide a means to obtain model-consistent fast linearized simulation results for use in load cases screening, pre-design optimization, and control development.

*Code availability.* The MATLAB code used for simulations and the numerical data are provided upon request to the main author.

*Author contributions.* BP was primarily responsible for writing the paper and independently developed the entire programming framework used for the simulations. He played a key role in the conceptualization of the models, the exploration of methods, and the generation, validation, and visualization of results. HB developed the methodology together with BP. TK and WY contributed to the development of the methodology and guided the investigative aspects of the work together with HB. They actively participated in the revisions and editing process.

*Competing interests.* The corresponding author declares that none of the authors have any competing interests.

*Acknowledgements.* We thank the first anonymous reviewer for his or her insightful remarks and constructive suggestions. These comments have guided us in clarifying the treatment of hydrodynamic damping, rotor load evaluation, and the assumption on the forcing term in the Laplace method. As thoughtfully suggested, we have also added a discussion on the impact of higher turbulence intensity on the model's linearization. We thank the second anonymous reviewer as well for the careful reading and valuable suggestions. In response, we have expanded the explanations of the load case results, clarified and corrected the equation notations. We have also included additional details on the hydrodynamic simulations.

## 980 Appendix A: Velocity triangle

To calculate the aerodynamic load  $F_{t,aero}$  and  $L_{aero}$ , we quantify the relative velocity  $V_{rel,t}$  and  $V_{rel,l}$  by analyzing the velocity triangle in Fig. A1.

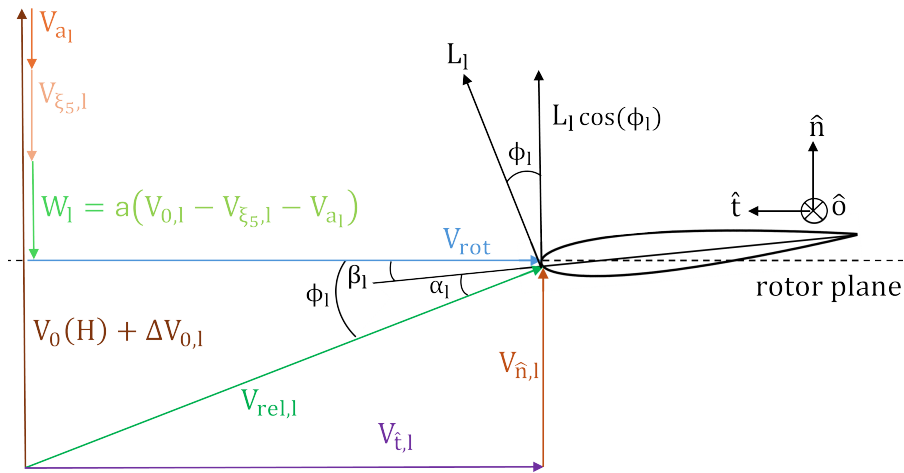

**Figure A1.** Velocity triangle for the airfoil located at the radial position of  $r = d$  on the blade.

The integrated normal force  $F_{l,aero}$  on the  $l^{th}$  blade is given by

$$F_{l,aero} = \underbrace{L_l \cos \phi_l}_{F_l} L_b = \frac{1}{2} \rho c C_{L,l}(\alpha) V_{rel,t,rel,l}^2 \cos \phi_l L_b, \quad (A1)$$

985 where  $\phi_l$  is the inflow angle and  $C_{L,l}(\alpha)$  is the lift coefficient as a function of the angle of attack. These aerodynamic properties are evaluated for the airfoil at  $r = d$ , which is located at 70% of the blade's length ( $d = 0.7L_b$ ), and the detailed justification can be found in Section 2.3. In this study, it is assumed that the drag and tangential induced velocity contributions are relatively small compared to the lift and axial induction respectively, and can thus be neglected. While assuming additionally the same inflow angle  $\phi_l$  for the entire blade, we ignore the effects of variation in blade deformation across the blade. Although the inflow angle varies considerably along the blade span, it is evaluated only at a single radial reference position, which is used to compute the aerodynamic forcing for the entire blade. Nevertheless, the assumption of a single inflow angle and angle of attack per blade affects the accuracy of the overall rotor aerodynamic loads. This modeling choice is, however, justified by the objective of developing a floating wind turbine model with fewer DOFs and by the disproportionately high contribution of aerodynamic loads at that blade location, refer to the explanation provided in Section 2.3. In Eq. (A1), for linearization purposes,  $F_l = L_l \cos \phi_l$  represents the aerodynamic load contribution that dictates the floating wind turbine's dynamics. For the development of the LM, the contributions of the dynamic lift coefficient  $C_{L,l}(\alpha)$ , the squared relative wind speed  $V_{rel,l}^2 = V_{\hat{n},l}^2 + V_{\hat{t},l}^2$ , and the cosine of the inflow angle,  $\cos \phi_l$ , are linearized about the operating point. In contrast, for the TDM, these time-varying quantities are not linearized with respect to the time derivative of the structural DOFs vector  $\dot{x}$ , the dynamic stall separation-function DOFs  $f_{s,l}$ , or the inflow velocity fluctuation  $\Delta V_{0,l}$ . Unlike the LM, the TDM retains nonlinear contributions, for example in the computation of  $V_{rel,l}^2$ . The TDM accounts for the direct time variation of these aerodynamic parameters by employing their original nonlinear definitions.

As illustrated in Fig. A1, the relative velocity  $V_{rel,t}$  component that is normal to the rotor plane,  $V_{\hat{n},l}$ , is impacted by a steady-state constant wake induction factor  $a$ . Conversely, the velocity tangential to the rotor plane,  $V_{\hat{t},l}$ , is approximated not to be impacted by a tangential induction wake factor,  $a'$ , since this is usually small. Therefore,  $V_{\hat{t},l}$  is equal to the rotational speed itself  $V_{rot} = -\Omega d$ . Additional relations are found with respect to the inflow angle  $\phi_l$ , the angle of attack  $\alpha_l$  and the twist angle  $\beta_l$ , such as  $\phi_l = \alpha_l + \beta_l$ , and  $\phi_l = \tan^{-1}(-V_{\hat{n},l}/V_{\hat{t},l})$ . The velocity normal to the rotor plane is given by  $V_{\hat{n},l} = (1-a)(V_{0,l} - V_{\xi_5,l} - V_{a_l})$ , where  $V_{0,l} = V_0(H) + \Delta V_{0,l}$ ,  $V_{\xi_5,l} = \dot{\xi}_5(H + d \cos \Psi_l)$  and  $V_{a_l} = \dot{a}_l \phi_{1f}(d)$ . This entails

that the squared normal velocity  $V_{\hat{n},l}^2$  can be expanded as

$$\begin{aligned}
V_{\hat{n},l}^2 = (1-a)^2 & \left( \underbrace{V_0^2(H)}_{\text{steady term}} + \underbrace{2\dot{\xi}_5(H+d\cos\Psi_l)\dot{a}_l\phi_{1f}(d)}_{\text{higher-order term neglected}} \right. \\
& + \underbrace{\xi_5^2(H+d\cos\Psi_l)^2 + \dot{a}_l^2\phi_{1f}(d)^2}_{\text{higher-order terms neglected}} \\
& + \underbrace{2(V_0(H) + \Delta V_{0,l}) \left( -\dot{\xi}_5(H+d\cos\Psi_l) - \dot{a}_l\phi_{1f}(d) \right)}_{\text{damping contribution}} \\
& \left. + \underbrace{\Delta V_{0,l}^2 + 2V_0(H)\Delta V_{0,l}}_{\text{forcing contribution}} \right), \tag{A2}
\end{aligned}$$

1010 where  $\Delta V_{0,l} = \Delta V_{0,l, \text{shear}} + \Delta V_{0,l, \text{turb}}$ . The damping contribution of the periodic shear inflow velocity variation  $\Delta V_{0,l, \text{shear}}$  is considered within the system-structural damping matrix of the system  $C_S$ . ~~This applies because of the periodicity of  $\Delta V_{0,l, \text{shear}}$  according to~~ as an addition of the aerodynamic damping matrix  $C_A$  (Eq. (14)). The periodicity of  $\Delta V_{0,l, \text{shear}}$  (Eq. (11)) induces a higher-order harmonic time dependence in the aerodynamic damping matrix  $C_A$  (Eq. (15)). This time dependence cannot subsequently be eliminated from the state-space system matrix  $A$  (Eq. (17)) using

1015 the Coleman transform, even if the system is formulated in a non-rotating frame. From Eq. (A2), ~~we neglect however the~~ it is evident that both the shear inflow velocity fluctuation  $\Delta V_{0,l, \text{shear}}$  and the spatially coherent turbulent fluctuation  $\Delta V_{0,l, \text{turb}}$  add to the total velocity variation  $\Delta V_{0,l}$ , which in turn influences the forcing term. Also, from Eq. (A2), we neglect the damping contribution of the term  $2\Delta V_{0,l, \text{turb}} \left( -\dot{\xi}_5(H+d\cos\Psi_l) - \dot{a}_l\phi_{1f}(d) \right)$  which is influenced by the spatially coherent velocity fluctuation  $\Delta V_{0,l, \text{turb}}$ .

1020 Moreover, partial derivatives involving the inflow angle  $\phi_l$ , and a variable of interest, denoted by the  $\cdot$  symbol, i.e.  $\frac{\partial \phi_l}{\partial \cdot}$  and  $\frac{\partial \cos \phi_l}{\partial \cdot}$ , become relevant when linearizing the system equations. They are found to be

$$\begin{aligned}
\frac{\partial \phi_l}{\partial \cdot} &= \frac{1}{-V_{\hat{t}, \text{st}} \left( \frac{V_{\hat{n}, \text{st}}^2}{V_{\hat{t}, \text{st}}^2} + 1 \right)} \frac{\partial V_{\hat{n}, l}}{\partial \cdot}, \\
\frac{\partial \cos \phi_l}{\partial \cdot} &= -\frac{V_{\hat{n}, \text{st}}}{V_{\hat{t}, \text{st}}^2 \left( \frac{V_{\hat{n}, \text{st}}^2}{V_{\hat{t}, \text{st}}^2} + 1 \right)^{\frac{3}{2}}} \frac{\partial V_{\hat{n}, l}}{\partial \cdot}, \tag{A3}
\end{aligned}$$

and are related to the derivation-partial derivative of the normal velocity  $V_{\hat{n},l}$  as shown in our previous paper's Eqs. (24) and (25) (Pamfil et al., 2025).

1025 **Appendix B: Øye dynamic stall model and related studies**

The Øye dynamic stall model comprises of an equation for the dynamic lift coefficient  $C_L$  and for the separation function  $f_s$  that influences its behavior. This model is linearized by applying Eq. (12) first for the dynamic lift coefficient  $C_L$  from Øye's model Øye (1991),

$$C_{L,l}(\alpha_l, f_{s,l}) = f_{s,l} C_{L,inv,l}(\alpha_l) + (1 - f_{s,l}) C_{L,stall,l}(\alpha_l). \quad (B1)$$

1030 In our anterior studies using this dynamic stall model (Pamfil et al., 2025), we have described ~~in Eq. (29)~~ the linearized terms

$\frac{\partial C_{L,l}}{\partial \alpha_l}$  and  $\frac{\partial C_{L,l}}{\partial f_{s,l}}$  ~~respectively as~~

$$\begin{aligned} \frac{\partial C_{L,l}}{\partial \alpha_l} &= f_s \left. \frac{\partial C_{L,inv,l}}{\partial \alpha_l} \right|_{st} + (1 - f_s) \left. \frac{\partial C_{L,stall,l}}{\partial \alpha_l} \right|_{st}, \\ \frac{\partial C_{L,l}}{\partial f_{s,l}} &= C_{L,inv,l}(\alpha_l)|_{st} - C_{L,stall,l}(\alpha_l)|_{st}. \end{aligned} \quad (B2)$$

Using the airfoil data from Fig. 3 in our [previous](#) investigations (Pamfil et al., 2025), the values of  $\left. \frac{\partial C_{L,inv,l}}{\partial \alpha_l} \right|_{st}$  and  $\left. \frac{\partial C_{L,stall,l}}{\partial \alpha_l} \right|_{st}$  are numerically evaluated under steady-state conditions (~~stst~~) as gradients at the operating angle of attack  $\alpha_l$  through the cubic

1035 spline interpolation. To quantify  ~~$\frac{\partial C_{L,l}}{\partial \alpha_l}$ , the the partial derivative~~  $\frac{\partial C_{L,l}}{\partial \cdot}$  for a given variable designated by the  $\cdot$  symbol, the [following](#) relation between the angle of attack and inflow angle must be considered [according to Eq. \(30\) \(Pamfil et al., 2025\)](#):

$$\frac{\partial C_{L,l}}{\partial \cdot} = \frac{\partial C_{L,l}}{\partial \alpha_l} \frac{\partial \alpha_l}{\partial \cdot} = \frac{\partial C_{L,l}}{\partial \alpha_l} \frac{\partial \phi_l}{\partial \cdot}. \quad (B3)$$

At last, the Ordinary Differential Equation (ODE) for the dynamic stall separation function  $f_{s,l}$ ,  ~~$\dot{f}_{s,l} = (f_{s,static,l} - f_{s,l})/\tau$~~   $\dot{f}_{s,l} = (f_{s,static,l} - f_{s,l})/\tau$  is linearized as

$$\begin{aligned} \dot{f}_{s,l,lin} &= -\frac{f_{s,l}}{\tau} + \\ &\frac{1}{\tau} \left( f_{s,static,l}|_{st} + \left. \frac{\partial f_{s,static,l}}{\partial \alpha_l} \right|_{st} \left. \frac{\partial \phi_l}{\partial \xi_5} \right|_{st} \dot{\xi}_5 + \right. \\ &\left. + \left. \frac{\partial f_{s,static,l}}{\partial \alpha_l} \right|_{st} \left. \frac{\partial \phi_l}{\partial \dot{\alpha}_l} \right|_{st} \dot{\alpha}_l + \left. \frac{\partial f_{s,static,l}}{\partial \alpha_l} \right|_{st} \left. \frac{\partial \phi_l}{\partial \Delta V_{0,l}} \right|_{st} \Delta V_{0,l} \right), \end{aligned} \quad (B4)$$

where the time constant is  ~~$\tau = (4c)/V_{rel,st}$~~   $\tau = (4c)/V_{rel,st}$ . The partial derivative  $\left. \frac{\partial f_{s,static,l}}{\partial \alpha_l} \right|_{st}$  required for the LM is obtained by numerically computing the gradient at the relevant operating angle of attack  $\alpha_l$ , based on the airfoil data presented in Fig. 4 from our published paper (Pamfil et al., 2025). As a reminder, the dynamic stall model, like the floating wind turbine model, is

1045 employed solely as a demonstration platform to [validate-verify](#) the fast response methodology, and is not intended to constitute a central contribution of this study. Øye's dynamic stall model has only a single state and does not account for the separation effect of the vorticity that is shed from the airfoil's trailing edge. This phenomenon is captured analytically by Theodorsen's

function and it is incorporated in the Beddoes-Leishman dynamic stall model (Leishman and Beddoes, 1986). However, we selected the Øye model for this analysis because it simplifies both the implementation and the linearization of the dynamic stall equations within the state-space framework. The validity of the linearization of the Øye dynamic stall model has been verified using the same dynamic model as in our previous published work (Pamfil et al., 2025). Therefore, in Fig. 6 (Pamfil et al., 2025) we compared for both the LM and the TDM the dynamic lift and stall behavior with a periodic floater pitch  $M_F$  excitation. The analysis was carried out at three different operational points near the region of maximum static lift coefficient  $C_{L,static}$ . It demonstrated that overall there is a good agreement between the TDM and LM time series for the angle of attack  $\alpha$  and the lift coefficient  $C_L$ . A more extensive dynamic stall analysis could compare the behavior of multiple dynamic stall models. In pursuit of this goal, DNV developed a dynamic stall state-space model within its `aeroelastic` code Bladed, named IAG (Bangga et al., 2023), in reference to the Institute of Aerodynamics and Gas Dynamics at the University of Stuttgart, reflecting the developer's former affiliation. Their study investigated how the Øye, Beddoes–Leishman, and IAG dynamic stall models respond to varying excitation frequencies in edgewise vibrations of large and flexible wind turbine blades (Bangga et al., 2023), offering valuable insights for blade design. However, choosing the appropriate dynamic stall model is left to the reader, depending on the specific operating conditions, and conducting such a sensitivity study is beyond the scope of this work.

## Appendix C: Supplementary statistical analysis

### C1 Load case C: variation of inflow turbulence intensity

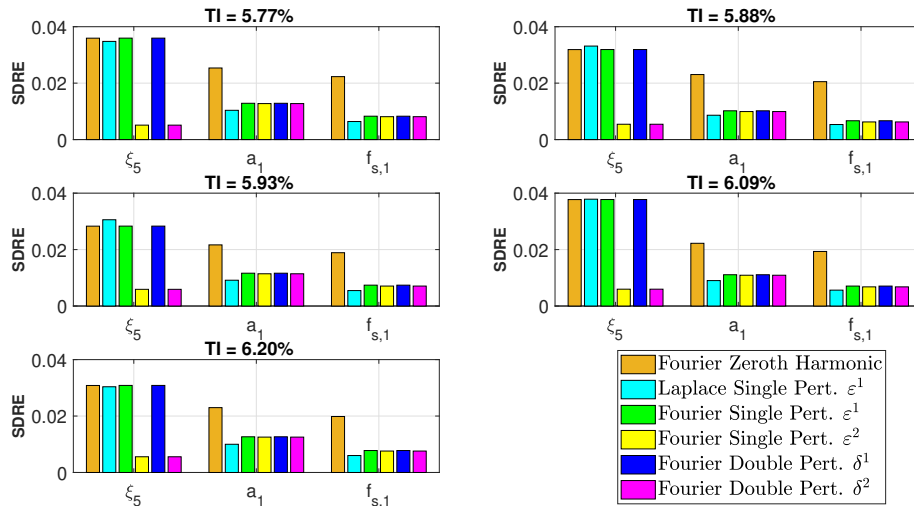

**Figure C1.** Standard Deviation Relative Error (SDRE) for load case C turbulence intensity (TI) variations and response channels. The analyzed fast response methods are the Fourier zeroth harmonic, as well as the double and single perturbation (Pert.) methods.

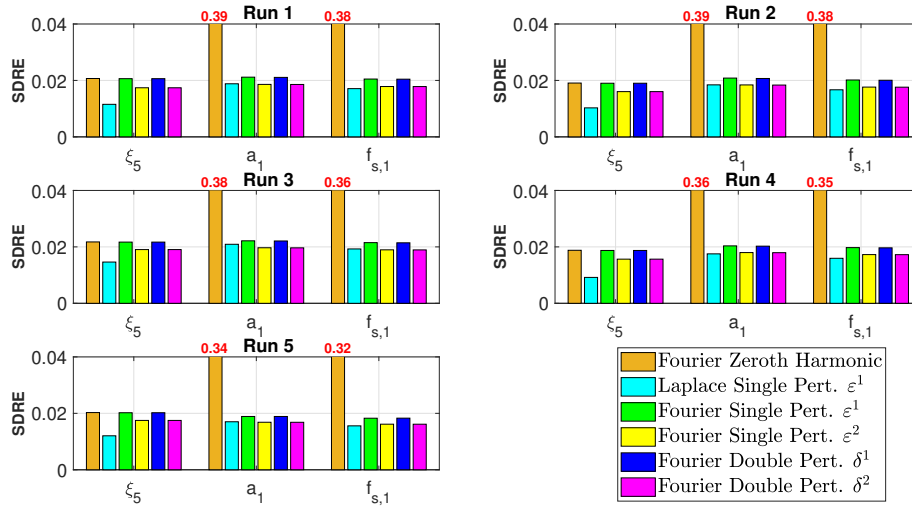

**Figure C2.** Standard Deviation Relative Error (SDRE) for load case  $D$  multiple runs with different stochastic floater pitch moment and response channels. The analyzed fast response methods are the Fourier zeroth harmonic, as well as the double and single perturbation (Pert.) methods.

**Appendix D: Simulation protocols for Seeds 1 and 2**

The simulations protocols are summarized with the following steps for the zeroth harmonic and higher-order perturbation (Pert.) methods:

**Appendix: Zeroth Harmonic**

- 1070 Seed 1: (a) Compute  $F_{B,L}$  and store  $M_S^{-1}$  (Eq. (21)).
- (b) Calculate  $A_{L,0}$  via Hill decomposition (Eq. (27)).
- Seed 2: (a) Compute  $F_{B,L}$  using stored  $M_S^{-1}$ .
- (b) Use stored  $A_{L,0}$ .

**Appendix: Single Pert.**

- 1075 Seed 1: (a) Compute  $F_{B,L}$  and store  $M_S^{-1}$ .
- (b) Calculate average  $A_{L,0}$  and higher first-order harmonic  $\tilde{A}_L = A_L - A_{L,0}$  for time series (Eq. (27)).
- Seed 2: (a) Compute  $F_{B,L}$  using stored  $M_S^{-1}$ .
- (b) Use stored  $A_{L,0}$  and  $\tilde{A}_L$ .

**Appendix: Double Pert.**

- 1080 Seed 1: (a) Compute  $\mathbf{F}_{B,L}$  and store  $\mathbf{M}_S^{-1}$ .  
 (b) Calculate  $\mathbf{A}_{L,0}$  and harmonics  $\mathbf{A}_{L,j}$  ( $j > 0$ ) via Hill decomposition (Eq. (27)).  
 (c) Compute  $\tilde{\mathbf{A}}_{L,j}$  for time series using  $\mathbf{A}_{L,j}$  (Eq. (27)).
- Seed 2: (a) Compute  $\mathbf{F}_{B,L}$  using stored  $\mathbf{M}_S^{-1}$ .  
 (b) Use stored  $\mathbf{A}_{L,0}$  and  $\tilde{\mathbf{A}}_{L,j}$ .

1085 **Appendix: Laplace Single Pert.**

- Seed 1: (a) Compute  $\mathbf{F}_{B,L}$  and store  $\mathbf{M}_S^{-1}$ .  
 (b) Simplify symbolic  $s$ -domain Eq. (36) and compute time solution via inverse Laplace (Eqs. (37) and (38)).
- Seed 2: (a) Compute  $\mathbf{F}_{B,L}$  using stored  $\mathbf{M}_S^{-1}$ .  
 (b) Use stored time-domain solution (Eqs. (37) and (38)).

1090 **Appendix E: Nomenclature**

|                         |                                              |                               |                                                                               |
|-------------------------|----------------------------------------------|-------------------------------|-------------------------------------------------------------------------------|
|                         |                                              | $\delta a_l(t)$               | Blade displacement amplitude virtual work                                     |
| 1f                      | Blade first flapwise mode                    | 1105 $\delta u_l(r,t)$        | Blade displacement virtual work                                               |
| $\alpha_l$              | Airfoil angle of attack as blade variable    | $\Delta V_{0,\text{turb}}$    | Rotor spatially coherent turbulence inflow velocity variation                 |
| $\beta_l$               | Airfoil twist angle as blade variable        | $\Delta V_{0,l,\text{shear}}$ | Blade shear inflow velocity variation                                         |
| 1095 $\mathbf{0}$       | Zero vector or zero matrix                   | $\Delta V_{0,l}$              | Blade inflow velocity variation                                               |
| $\mathbf{F}_B$          | State-space forcing input vector             | 1110 $\delta^n$               | Perturbation of order $n$                                                     |
| $\mathbf{F}_L$          | Linear model forcing vector                  | $\delta_k$                    | Logarithmic decrement for a $k^{\text{th}}$ degree of freedom                 |
| $\mathbf{F}_T$          | Time-domain model forcing vector             | $\epsilon_{\text{wave},j}$    | Wave spectrum stochastic phase shift                                          |
| $\mathbf{F}_{B,L}$      | Linear model state-space forcing vector      | $\gamma$                      | JONSWAP spectrum enhancement factor                                           |
| 1100 $\mathbf{F}_{B,T}$ | Time-domain model state-space forcing vector | $\hat{A}_l(r,t)$              | Blade element acceleration tracked in $\hat{x}' - \hat{y}'$ coordinate system |
| $\mathbf{q}$            | State vector                                 | 1115 $\hat{D}_l(r,t)$         | Blade element position tracked in $\hat{x}' - \hat{y}'$ coordinate system     |
| $\mathbf{x}$            | Structural degrees of freedom vector         |                               |                                                                               |
| $\delta \xi_5(t)$       | Floater pitch angle virtual work             |                               |                                                                               |

|      |                   |                                                                           |                  |                                                                                  |
|------|-------------------|---------------------------------------------------------------------------|------------------|----------------------------------------------------------------------------------|
|      | $\hat{V}_l(r, t)$ | Blade element velocity tracked in $\hat{x}' - \hat{y}'$ coordinate system | QuLAF            | Quick Load Analysis of Floating wind turbines                                    |
|      |                   |                                                                           | RAFT             | Response Amplitudes of Floating Turbines                                         |
| 1120 | $\hat{x}_{Bot}$   | Spar-buoy submerged underwater draft                                      | RK4              | Fourth-order Runge-Kutta                                                         |
|      | <b>A</b>          | State-space system matrix                                                 | 1145             | SDRE Standard Deviation Relative Error                                           |
|      | $\mathbf{A}_L$    | Linear model system matrix                                                |                  | SLOW Simplified Low-Order Wind turbine                                           |
|      | $\mathbf{A}_T$    | Time-domain model system matrix                                           | st               | Steady value of variable                                                         |
|      | $\mathbf{C}_A$    | Aerodynamic damping matrix                                                | TDM              | Time-Domain Model                                                                |
| 1125 | $\mathbf{C}_S$    | Structural damping matrix                                                 | TI               | Turbulence Intensity                                                             |
|      | <b>I</b>          | Identity matrix                                                           | 1150             | WAMIT Wave Analysis MIT                                                          |
|      | $\mathbf{K}_S$    | Structural stiffness matrix                                               | $\mu$            | Structural stiffness matrix scaling factor for Rayleigh damping characterization |
|      | $\mathbf{M}_S$    | Structural mass matrix                                                    | $\nu_{shear}$    | Wind shear exponent                                                              |
|      | ANOVA             | Analysis of Variance                                                      | $\Omega$         | Constant rotational speed                                                        |
| 1130 | DOF               | Degree of Freedom                                                         | 1155             | $\Omega_M$ Floater pitch moment excitation frequency                             |
|      | EOM               | Equation of Motion                                                        | $\omega_{1f}$    | Blade first flapwise mode natural frequency                                      |
|      | FFT               | Fast Fourier Transform                                                    | $\omega_{wave}$  | JONSWAP spectrum wave frequency                                                  |
|      | FOWT              | Floating Offshore Wind Turbine                                            | $\omega_{\xi_5}$ | Floater pitch natural frequency                                                  |
|      | IAG               | Institute of Aerodynamics and Gas Dynamics                                | $\phi_l$         | Airfoil inflow angle as blade variable                                           |
| 1135 | iFFT              | Inverse Fast Fourier Transform                                            | 1160             | $\phi_{1f}$ Blade first flapwise mode shape                                      |
|      | lin               | Linearized variable                                                       | $\Psi_l(t)$      | Blade azimuthal angular position                                                 |
|      | LM                | Linear Model                                                              | $\rho$           | Air density                                                                      |
|      | LPT               | Linear Potential Theory                                                   | $\rho_{water}$   | Water density                                                                    |
|      | LTI               | Linear Time-Invariant                                                     | $\tau$           | Dynamic stall time constant                                                      |
| 1140 | ODE               | Ordinary Differential Equation                                            | 1165             | $\tau_{hydro}$ Hydrodynamic moment                                               |
|      | PSD               | Power Spectral Density                                                    | $\xi_5$          | Floater pitching angle                                                           |
|      |                   |                                                                           | $\zeta_k$        | Damping ratio for a $k^{th}$ degree of freedom                                   |

|      |                         |                                                            |      |                     |                                             |
|------|-------------------------|------------------------------------------------------------|------|---------------------|---------------------------------------------|
|      | $a$                     | Axial induction factor normal to rotor plane               |      | $H$                 | Hub height                                  |
|      | $a'$                    | Tangential induction factor                                |      | $h$                 | Water depth                                 |
| 1170 | $a_l$                   | Blade deflection amplitude                                 |      | $H_s$               | JONSWAP spectrum significant wave height    |
|      | $A_M$                   | Floater pitch moment amplitude                             |      | $k(r)$              | Blade sectional stiffness                   |
|      | $A_{\text{Spar}}$       | Spar-buoy cylinder cross-sectional area                    | 1195 | $k_{\text{wave},j}$ | Wave number                                 |
|      | $A_{\text{wave},j}$     | JONSWAP spectrum wave amplitude                            |      | $l$                 | Blade index                                 |
|      | $c$                     | Airfoil chord length                                       |      | $L_b$               | Blade length                                |
| 1175 | $C_a$                   | Hydrodynamic added mass coefficient                        |      | $L_l$               | Blade lift force per unit length            |
|      | $C_m$                   | Hydrodynamic inertia coefficient                           |      | $M$                 | Combined mass of nacelle and hub            |
|      | $C_{L,\text{inv}}$      | Airfoil inviscid flow lift coefficient                     | 1200 | $m(r)$              | Blade mass per unit length                  |
|      | $C_{L,\text{stall}}$    | Airfoil fully separated flow lift coefficient              |      | $M_F$               | Floater pitch moment                        |
|      | $C_{L,\text{static}}$   | Airfoil static lift coefficient                            |      | $M_{\text{aero}}$   | Aerodynamic moment for floater pitch motion |
| 1180 | $C_{L,l}$               | Airfoil dynamic lift coefficient as blade variable         |      | $N_b$               | Number of blades                            |
|      | $d$                     | Blade reference radial position from the root              |      | $N_s$               | Number of states, or the system dimension   |
|      | $D_l(r,t)$              | Blade element distance from the floater basis              | 1205 | $p_l(r,t)$          | Blade rate of change of angular momentum    |
|      | $D_{\text{Spar}}$       | Spar-buoy diameter                                         |      | $r$                 | Blade radial position from the root         |
|      | $F_{\text{hydro}}$      | Hydrodynamic force                                         |      | $t$                 | Time                                        |
| 1185 | $F_{l,\text{aero}}$     | Blade aerodynamic load                                     |      | $t_i$               | Time step of index $i$                      |
|      | $f_{s,\text{static},l}$ | Dynamic stall static separation function as blade variable |      | $T_p$               | JONSWAP spectrum peak period                |
|      |                         |                                                            | 1210 | $u_l(r,t)$          | Blade deflection                            |
|      | $f_{s,l}$               | Dynamic stall separation function as blade variable        |      | $V_0(H)$            | Rotor constant inflow at hub height         |
|      | $g$                     | Gravitational constant                                     |      | $V_r$               | Rated wind speed                            |
| 1190 | $GF_{a_l}$              | Generalized aerodynamic blade force                        |      | $V_{\text{rel},l}$  | Airfoil relative velocity as blade variable |

## References

- 1215 Abdelmoteleb, S.-E. and Bachynski-Polić, E. E.: Evaluating Different Approaches for Modelling Rotor Aero-servo-dynamics in Frequency-Domain Analysis of Floating Wind Turbines, Authorea, <https://doi.org/10.22541/au.171011099.94143130/v1>, 2024.
- Abdelmoteleb, S.-E. and Bachynski-Polić, E. E.: A frequency-domain optimization procedure for catenary and semi-taut mooring systems of floating wind turbines, *Marine Structures*, 101, 103 768, <https://doi.org/https://doi.org/10.1016/j.marstruc.2024.103768>, 2025.
- 1220 Bak, C., Zahle, F., Bitsche, R., Kim, T., Yde, A., Henriksen, L. C., Natarajan, A., and Hansen, M.: Description of the DTU 10 MW reference wind turbine, DTU Wind Energy Report-I-0092, 5, 2013.
- Bangga, G., Parkinson, S., and Collier, W.: Development and Validation of the IAG Dynamic Stall Model in State-Space Representation for Wind Turbine Airfoils, *Energies*, 16, <https://doi.org/10.3390/en16103994>, 2023.
- Bender, C. M. and Orszag, S. A.: *Advanced Mathematical Methods for Scientists and Engineers I: Asymptotic Methods and Perturbation Theory*, Springer, New York, NY, 1 edn., ISBN 978-0-387-98931-0, <https://doi.org/10.1007/978-1-4757-3069-2>, originally published by McGraw Hill, 1978. Part of the Springer Book Archive. Perturbation theory is covered in Part III, titled "Perturbation Methods". Chapter 7, "Perturbation Series", spans pages 319–367., 1999.
- 1225 Bir, G.: Multi-Blade Coordinate Transformation and its Application to Wind Turbine Analysis, <https://doi.org/10.2514/6.2008-1300>, 2008.
- Borg, M., Pegalajar-Jurado, A., Stiesdal, H., Madsen, F., Nielsen, T., Mikkelsen, R., Mirzaei, M., Lomholt, A., and Bredmose, H.: Dynamic response analysis of the TetraSpar floater in waves: Experiment and numerical reproduction, *Marine Structures*, 94, <https://doi.org/10.1016/j.marstruc.2023.103546>, 2024.
- 1230 Coleman, R., Feingold, A., and for Aeronautics, U. S. N. A. C.: *Theory of Self-excited Mechanical Oscillations of Helicopter Rotors with Hinged Blades*, NACA R-1351, National Advisory Committee for Aeronautics, 1957.
- Coolley, J. W. and Tukey, J. W.: An Algorithm for the Machine Calculation of Complex Fourier Series, *Mathematics of Computation*, 19, 297–301, <https://doi.org/10.2307/2003354>, 1965.
- 1235 de Hoog, F. R., Knight, J. H., and Stokes, A. N.: An Improved Method for Numerical Inversion of Laplace Transforms, *SIAM Journal on Scientific and Statistical Computing*, 3, 357–366, <https://doi.org/10.1137/0903022>, 1982.
- Floquet, G.: Sur les équations différentielles linéaires à coefficients périodiques, *Annales scientifiques de l'École Normale Supérieure*, 2e série, 12, 47–88, <https://doi.org/10.24033/asens.220>, 1883.
- 1240 Hall, M., Housner, S., Zalkind, D., Bortolotti, P., Ogden, D., and Barter, G.: An Open-Source Frequency-Domain Model for Floating Wind Turbine Design Optimization, *Journal of Physics: Conference Series*, 2265, 042 020, <https://doi.org/10.1088/1742-6596/2265/4/042020>, 2022.
- Hall, M., West, W., Housner, S., and Lozon, E.: Efficient Modeling of Floating Wind Arrays Including Current Loads and Seabed Bathymetry, in: *Proceedings of the ASME 2023 International Offshore Wind Technical Conference*, vol. 1, pp. 1–9, American Society of Mechanical Engineers, <https://doi.org/https://doi.org/10.1115/IOWTC2023-119447>, 2023.
- 1245 Hansen, M.: *Aerodynamics of wind turbines*, Earthscan, 3 edn., ISBN 9781138775077, 2015.
- Hansen, M. H.: Modal dynamics of structures with bladed isotropic rotors and its complexity for two-bladed rotors, *Wind Energy Science*, 1, 271–296, <https://doi.org/10.5194/wes-1-271-2016>, 2016.
- Hill, G. W.: On the part of the motion of the lunar perigee which is a function of the mean motions of the sun and moon, *Acta Mathematica*, 36, 1871–2509, <https://doi.org/https://doi.org/10.1007/BF02417081>, 1886.

- 1250 Larsen, T. J. and Hanson, T. D.: A method to avoid negative damped low frequent tower vibrations for a floating, pitch controlled wind turbine, *Journal of Physics: Conference Series*, 75, 012 073, <https://doi.org/10.1088/1742-6596/75/1/012073>, 2007.
- Leishman, J. G. and Beddoes, T. S.: A Generalised Model for Airfoil Unsteady Aerodynamic Behaviour and Dynamic Stall Using the Indicical Method, in: *Proceedings of the 42nd Annual Forum of the American Helicopter Society*, pp. 1–23, presented at the 42nd Annual Forum, American Helicopter Society, Washington, D.C., USA, 1986.
- 1255 Lemmer, F., Müller, K., Yu, W., Schlipf, D., and Cheng, P. W.: Optimization of Floating Offshore Wind Turbine Platforms with a Self-Tuning Controller, in: *Proceedings of the ASME 2017 36th International Conference on Ocean, Offshore and Arctic Engineering*, vol. 10, pp. 1–8, American Society of Mechanical Engineers, <https://doi.org/http://dx.doi.org/10.18419/opus-9174>, 2017.
- Lemmer, F., Yu, W., Luhmann, B., Schlipf, D., and Cheng, P. W.: Multibody modeling for concept-level floating offshore wind turbine design, *Multibody System Dynamics*, 49, 203–236, <https://doi.org/10.1007/s11044-020-09729-x>, 2020a.
- 1260 Lemmer, F., Yu, W., Schlipf, D., and Cheng, P. W.: Robust gain scheduling baseline controller for floating offshore wind turbines, *Wind Energy*, 23, 17–30, <https://doi.org/https://doi.org/10.1002/we.2408>, 2020b.
- Lemmer, F., Yu, W., Steinacker, H., Skandali, D., and Raach, S.: Advances on Reduced-Order Modeling of Floating Offshore Wind Turbines, Volume 9: *Ocean Renewable Energy*, V009T09A034, <https://doi.org/10.1115/OMAE2021-63701>, 2021.
- Lozon, E., Hall, M., and Mahfouz, M. Y.: Coupled modeling of wake steering and platform offsets for floating wind arrays, *Journal of Physics: Conference Series*, 2767, 062 035, <https://doi.org/10.1088/1742-6596/2767/6/062035>, 2024.
- 1265 Madsen, F. J., Pegalajar-Jurado, A., and Bredmose, H.: Performance study of the QuLAF pre-design model for a 10 MW floating wind turbine, *Wind Energy Science*, 4, 527–547, <https://doi.org/10.5194/wes-4-527-2019>, 2019.
- Mann, J.: The spatial structure of neutral atmospheric surface-layer turbulence, *Journal of Fluid Mechanics*, 273, 141–168, <https://doi.org/10.1017/S0022112094001886>, 1994.
- 1270 Pamfil, B.: Linearized aero-hydro-servo-elastic modelling of floating wind turbines, Ph.D. thesis, 2025.
- Pamfil, B., Bredmose, H., and Kim, T.: Floating wind turbine stability and time response analysis with rotating modes, *Journal of Physics: Conference Series*, 2767, 022 057, <https://doi.org/10.1088/1742-6596/2767/2/022057>, 2024.
- Pamfil, B., Bredmose, H., and Kim, T.: Coleman-free aero-elastic stability methods for three- and two-bladed floating wind turbines, *Wind Energy Science*, 10, 827–856, <https://doi.org/10.5194/wes-10-827-2025>, 2025.
- 1275 Pegalajar-Jurado, A., Borg, M., and Bredmose, H.: An efficient frequency-domain model for quick load analysis of floating offshore wind turbines, *Wind Energy Science*, 3, 693–712, <https://doi.org/10.5194/wes-3-693-2018>, 2018.
- Pollini, N., Pegalajar-Jurado, A., and Bredmose, H.: Design optimization of a TetraSpar-type floater and tower for the IEA Wind 15 MW reference wind turbine, *Marine Structures*, 90, <https://doi.org/10.1016/j.marstruc.2023.103437>, 2023.
- Schlipf, D., Schlipf, D., and Kühn, M.: Nonlinear Model Predictive Control of Wind Turbines Using LIDAR, *Wind Energy*, 16, <https://doi.org/10.1002/we.1533>, 2013.
- 1280 Skjoldan, P.: Modal Dynamics of Wind Turbines with Anisotropic Rotors, <https://doi.org/10.2514/6.2009-1036>, 2009.
- Stehfest, H.: Algorithm 368: Numerical Inversion of Laplace Transforms [D5], *Communications of the ACM*, 13, 47–49, <https://doi.org/10.1145/361953.361969>, 1970.
- Talbot, A.: The accurate numerical inversion of Laplace transforms, *Journal of the Institute of Mathematics and Its Applications*, 23, 97–120, <https://doi.org/10.1093/imamat/23.1.97>, 1979.
- 1285 Zalkind, D. and Bortolotti, P.: Control Co-Design Studies for a 22 MW Semisubmersible Floating Wind Turbine Platform, *Journal of Physics: Conference Series*, 2767, 082 020, <https://doi.org/10.1088/1742-6596/2767/8/082020>, 2024.

Øye, S.: Dynamic stall, simulated as a time lag of separation', K.F. McAnulty (ed) Proceedings of the 4th IEA Symposium on the Aerodynamics of Wind Turbines, ETSU-N-118, 1991.
